# Supplementary material
Source: publisher site journal article supplement (https://mycokeys.pensoft.net/article/4852/download/suppl/37/)
Supplement: Supplementary file 1

## Sheet: Sheet1
Figure S7. Taxonomic classification of fungal shotgun metagenome samples.
sampleID	Region	Sequence ID	Ph	Cl	O	Best match	E-value	similarity (%)	ITS species hypothesis
G2653	SSU	G2653__RIB_10241	Ascomycota	Fungi other	Eurotiales	AF245259	1e-67	99.3
G2653	SSU	G2653__RIB_10317	Ascomycota	Archaeorhizomycetes	Archaeorhizomycetales	EU179935	2e-119	97.61
G2653	SSU	G2653__RIB_10362	Ascomycota	Fungi other		JF836020	2e-75	94.15
G2653	SSU	G2653__RIB_10423	Ascomycota	Fungi other		JF836023	3e-93	93.89
G2653	SSU	G2653__RIB_10467	Ascomycota	Fungi other		KF993708	9e-104	94.02
G2653	SSU	G2653__RIB_10671	Ascomycota	Archaeorhizomycetes		JF836023	0	97.15
G2653	SSU	G2653__RIB_1404	Ascomycota	Archaeorhizomycetes		KF993708	1e-117	97.21
G2653	SSU	G2653__RIB_1424	Ascomycota	Sordariomycetes	Sordariales	AB278186	1e-122	98.41
G2653	SSU	G2653__RIB_1565	Basidiomycota	Agaricomycetes	Agaricales	AEOK01000250	0	98.77
G2653	SSU	G2653__RIB_1724	Basidiomycota	Agaricomycetes	Trechisporales	GU576574	2e-71	99.33
G2653	SSU	G2653__RIB_1833	Ascomycota	Archaeorhizomycetes		KF993708	0	96.27
G2653	SSU	G2653__RIB_1881	Basidiomycota	Agaricomycetes	Polyporales	AEOV01000708	1e-108	99.54
G2653	SSU	G2653__RIB_1938	Ascomycota	Eurotiomycetes	Eurotiales	M83260	0	99.72
G2653	SSU	G2653__RIB_2020	Ascomycota	Archaeorhizomycetes		JF836023	0	98.71
G2653	SSU	G2653__RIB_2049	Basidiomycota	Agaricomycetes	Trechisporales	JQ689450	2e-127	98.46
G2653	SSU	G2653__RIB_2272	Ascomycota	Fungi other	Hypocreales	KC672743	2e-66	99.29
G2653	SSU	G2653__RIB_2478	Ascomycota	Fungi other	Xylariales	Z49785	2e-50	99.11
G2653	SSU	G2653__RIB_281	Ascomycota	Sordariomycetes	Sordariales	CP003011	0	98.9
G2653	SSU	G2653__RIB_326	Ascomycota	Archaeorhizomycetes		JF836023	2e-124	98.8
G2653	SSU	G2653__RIB_3688	Ascomycota	Archaeorhizomycetes		KF993708	0	98.61
G2653	SSU	G2653__RIB_3802	Ascomycota	Archaeorhizomycetes		KF993708	2e-114	96.41
G2653	SSU	G2653__RIB_3810	Ascomycota	Archaeorhizomycetes		JF836020	9e-84	97.79
G2653	SSU	G2653__RIB_392	Basidiomycota	Agaricomycetes	Agaricales	DQ457646	0	99.16
G2653	SSU	G2653__RIB_3946	Ascomycota	Archaeorhizomycetes		JF836020	1e-112	96.02
G2653	SSU	G2653__RIB_4479	Ascomycota	Saccharomycetes	Saccharomycetales	FJ763545	2e-104	95.42
G2653	SSU	G2653__RIB_4665	ascomycota	Fungi other		AF534711	9e-64	97.89
G2653	SSU	G2653__RIB_5060	Ascomycota	Archaeorhizomycetes		KF993708	1e-157	98.12
G2653	SSU	G2653__RIB_5141	Ascomycota	Archaeorhizomycetes		KF993708	5e-157	99.67
G2653	SSU	G2653__RIB_5534	Ascomycota	Archaeorhizomycetes		JF836020	1e-97	95.54
G2653	SSU	G2653__RIB_5545	Basidiomycota	Agaricomycetes	Trechisporales	AY803753	0	98.22
G2653	SSU	G2653__RIB_5677	Ascomycota	Archaeorhizomycetes		JF836023	1e-169	99.1
G2653	SSU	G2653__RIB_5700	Ascomycota	Fungi other		KF993708	7e-105	94.38
G2653	SSU	G2653__RIB_5726	Ascomycota	Archaeorhizomycetes		JF836023	0	97.89
G2653	SSU	G2653__RIB_59	Ascomycota	Fungi other		JF836020	3e-50	90.45
G2653	SSU	G2653__RIB_6203	Ascomycota	Fungi other		JF836020	7e-126	93.73
G2653	SSU	G2653__RIB_6247	Ascomycota	Fungi other		EU863581	5e-129	94.1
G2653	SSU	G2653__RIB_6397	Basidiomycota	Agaricomycetes	Hymenochaetales	U59064	2e-150	97.74
G2653	SSU	G2653__RIB_6546	Ascomycota	Archaeorhizomycetes		JF836023	5e-126	99.2
G2653	SSU	G2653__RIB_6880	Ascomycota	Archaeorhizomycetes		KF993708	0	99.15
G2653	SSU	G2653__RIB_7065	Ascomycota	Archaeorhizomycetes		KF993708	0	96.59
G2653	SSU	G2653__RIB_7108	Ascomycota	Eurotiomycetes	Eurotiales	GU824070	0	99.29
G2653	SSU	G2653__RIB_7195	Ascomycota	Eurotiomycetes		EF659775	5e-113	96.75
G2653	SSU	G2653__RIB_7249	Ascomycota	Archaeorhizomycetes	Archaeorhizomycetales	EU179935	9e-119	97.6
G2653	SSU	G2653__RIB_725	Ascomycota	Dothideomycetes	Capnodiales	KC674593	7e-120	98.37
G2653	SSU	G2653__RIB_7279	Ascomycota	Archaeorhizomycetes		JF836023	5e-121	98.01
G2653	SSU	G2653__RIB_7323	Ascomycota	Archaeorhizomycetes		KF993708	1e-111	98.27
G2653	SSU	G2653__RIB_7354	Ascomycota	Archaeorhizomycetes		KF993708	0	96.88
G2653	SSU	G2653__RIB_7492	Ascomycota	Archaeorhizomycetes		JF836023	0	97.89
G2653	SSU	G2653__RIB_7510	Basidiomycota	Agaricomycetes	Atheliales	JF819726	1e-101	99.03
G2653	SSU	G2653__RIB_7999	Ascomycota	Sordariomycetes	Diaporthales	DQ862047	5e-116	96.81
G2653	SSU	G2653__RIB_8030	Ascomycota	Archaeorhizomycetes		JF836020	3e-79	98.8
G2653	SSU	G2653__RIB_8048	Mortierellomycota	Mortierellomycetes		DQ510805	9e-119	97.6
G2653	SSU	G2653__RIB_8065	Ascomycota	Dothideomycetes	Dothideales	EU167562	5e-126	99.2
G2653	SSU	G2653__RIB_811	Ascomycota	Geoglossomycetes	Geoglossales	KC671703	1e-142	100
G2653	SSU	G2653__RIB_8773	Ascomycota	Sordariomycetes		GALN01475575	4e-124	96.97
G2653	SSU	G2653__RIB_8788	Ascomycota	Sordariomycetes	Ophiostomatales	HQ634826	7e-72	98.09
G2653	SSU	G2653__RIB_8842	Ascomycota	Archaeorhizomycetes		KF993708	7e-126	96.38
G2653	SSU	G2653__RIB_8878	Basidiomycota	Agaricomycetes		AY544697	2e-109	96.65
G2653	SSU	G2653__RIB_8933	Ascomycota	Archaeorhizomycetes		JF836023	3e-129	99.61
G2653	SSU	G2653__RIB_8976	Ascomycota	Archaeorhizomycetes		KF993708	0	98.98
G2653	SSU	G2653__RIB_9085	Ascomycota	Fungi other		GU568140	6e-61	95.89
G2653	SSU	G2653__RIB_914	Ascomycota	Archaeorhizomycetes		KF993708	2e-119	97.61
G2653	SSU	G2653__RIB_9286	Ascomycota	Sordariomycetes	Hypocreales	ABDF02000071	0	99.74
G2653	SSU	G2653__RIB_9530	Basidiomycota	Agaricomycetes		KC670634	1e-112	96.02
G2653	SSU	G2653__RIB_9551	Ascomycota	Archaeorhizomycetes		JF836020	9e-72	97.5
G2653	SSU	G2653__RIB_9678	Ascomycota	Archaeorhizomycetes		JF836020	1e-116	98.33
G2653	SSU	G2653__RIB_9680	Basidiomycota	Microbotryomycetes	Sporidiobolales	HM030914	1e-90	98.43
G2653	SSU	G2653__RIB_970	Basidiomycota	Fungi other		AY544697	1e-96	92.46
G2653	SSU	G2653__RIB_9814	Ascomycota	Sordariomycetes	Hypocreales	GU823680	0	96.17
G2653	SSU	G2653__RIB_9989	Ascomycota	Fungi other		JF836020	9e-146	92.33
G2655	SSU	G2655__RIB_1004	Ascomycota	Eurotiomycetes	Onygenales	AB075362	5e-108	97.4
G2655	SSU	G2655__RIB_1124	Basidiomycota	Agaricomycetes	Agaricales	DQ851574	5e-121	98.01
G2655	SSU	G2655__RIB_1136	Ascomycota	Leotiomycetes	Thelebolales	AEFC01000786	0	98.92
G2655	SSU	G2655__RIB_114	Mucoromycota	Mucoromycetes	Mucorales	JN604987	4e-122	98.4
G2655	SSU	G2655__RIB_119	Ascomycota	Geoglossomycetes	Geoglossales	KC672479	2e-90	97
G2655	SSU	G2655__RIB_1249	Ascomycota	Eurotiomycetes	Chaetothyriales	JN856013	0	98.03
G2655	SSU	G2655__RIB_1258	Ascomycota	Archaeorhizomycetes		JF836023	9e-119	97.61
G2655	SSU	G2655__RIB_1279	Ascomycota	Fungi other	Onygenales	M83264	2e-66	99.3
G2655	SSU	G2655__RIB_1376	Ascomycota	Fungi other		KF282678	7e-55	99.17
G2655	SSU	G2655__RIB_1397	Basidiomycota	Agaricomycetes	Boletales	DQ534694	5e-116	96.46
G2655	SSU	G2655__RIB_1444	Ascomycota	Leotiomycetes	Helotiales	AY342013	9e-140	95.79
G2655	SSU	G2655__RIB_149	Basidiomycota	Agaricomycetes	Agaricales	AF334916	2e-125	98.8
G2655	SSU	G2655__RIB_1542	Ascomycota	Eurotiomycetes	Onygenales	AB075362	3e-100	98.56
G2655	SSU	G2655__RIB_1667	Basidiomycota	Agaricomycetes	Boletales	AEQB01000388	3e-94	98.02
G2655	SSU	G2655__RIB_1823	Ascomycota	Eurotiomycetes		DQ986709	9e-124	98.8
G2655	SSU	G2655__RIB_1909	Basidiomycota	Tremellomycetes	Filobasidiales	JX159443	2e-124	98.8
G2655	SSU	G2655__RIB_2039	Ascomycota	Fungi other	Helotiales	AY706320	3e-63	99.26
G2655	SSU	G2655__RIB_2087	Basidiomycota	Agaricomycetes		KC670548	0	100
G2655	SSU	G2655__RIB_2088	Ascomycota	Eurotiomycetes	Chaetothyriales	FJ358326	8e-77	99.38
G2655	SSU	G2655__RIB_2172	Ascomycota	Eurotiomycetes	Onygenales	ABKI01000611	7e-120	98.77
G2655	SSU	G2655__RIB_2457	Basidiomycota	Agaricomycetes	Agaricales	JF706311	1e-127	99.6
G2655	SSU	G2655__RIB_2765	Ascomycota	Eurotiomycetes	Eurotiales	JX396260	2e-129	100
G2655	SSU	G2655__RIB_2853	ascomycota	Sordariomycetes		U20379	3e-128	99.6
G2655	SSU	G2655__RIB_3544	Mortierellomycota	Mortierellomycetes	Mortierellales	JN054669	0	99.72
G2655	SSU	G2655__RIB_3569	Ascomycota	Archaeorhizomycetes		KF993708	3e-113	98.7
G2655	SSU	G2655__RIB_3575	Basidiomycota	Agaricomycetes		EF024964	1e-127	99.6
G2655	SSU	G2655__RIB_3761	Ascomycota	Geoglossomycetes	Geoglossales	KC672479	9e-129	100
G2655	SSU	G2655__RIB_3799	Ascomycota	Archaeorhizomycetes		KF993708	2e-162	96.29
G2655	SSU	G2655__RIB_3826	Ascomycota	Fungi other		EF638687	1e-127	94.88
G2655	SSU	G2655__RIB_3855	Ascomycota	Fungi other		AB278196	2e-141	93.53
G2655	SSU	G2655__RIB_387	Basidiomycota	Agaricomycetes		KC671360	5e-167	99.38
G2655	SSU	G2655__RIB_3995	Basidiomycota	Agaricomycetes		AY382467	0	95.06
G2655	SSU	G2655__RIB_4020	Ascomycota	Sordariomycetes	Diaporthales	FJ392654	5e-126	99.2
G2655	SSU	G2655__RIB_4113	Basidiomycota	Tremellomycetes	Tremellales	EF023350	2e-125	99.2
G2655	SSU	G2655__RIB_4426	Ascomycota	Archaeorhizomycetes	Archaeorhizomycetales	EU179935	1e-173	95.78
G2655	SSU	G2655__RIB_4534	Basidiomycota	Agaricomycetes	Trechisporales	AY657012	0	99.51
G2655	SSU	G2655__RIB_4568	Basidiomycota	Tremellomycetes	Tremellales	FJ592404	1e-127	99.6
G2655	SSU	G2655__RIB_4584	Basidiomycota	Agaricomycetes		EF023830	9e-79	100
G2655	SSU	G2655__RIB_4712	Ascomycota	Fungi other	Chaetothyriales	FJ358326	3e-52	99.14
G2655	SSU	G2655__RIB_4932	Ascomycota	Fungi other	Erysiphales	AOLT01018271	3e-64	99.27
G2655	SSU	G2655__RIB_494	Ascomycota	Pezizomycetes	Pezizales	Z49754	2e-109	96.28
G2655	SSU	G2655__RIB_4940	Ascomycota	Sordariomycetes	Sordariales	AY706333	4e-143	99.64
G2655	SSU	G2655__RIB_5064	Ascomycota	Eurotiomycetes	Eurotiales	JN256017	4e-75	96.53
G2655	SSU	G2655__RIB_5085	Ascomycota	Archaeorhizomycetes		JF836020	9e-116	97.93
G2655	SSU	G2655__RIB_520	Ascomycota	Sordariomycetes	Calosphaeriales	JX073269	5e-126	99.2
G2655	SSU	G2655__RIB_5284	Ascomycota	Leotiomycetes	Thelebolales	JQ627475	8e-161	99.68
G2655	SSU	G2655__RIB_5325	Ascomycota	Sordariomycetes	Sordariales	AJ496245	1e-127	99.6
G2655	SSU	G2655__RIB_5355	Ascomycota	Sordariomycetes		JX066707	4e-169	95.01
G2655	SSU	G2655__RIB_5579	Basidiomycota	Agaricomycetes	Agaricales	JF706318	1e-127	99.6
G2655	SSU	G2655__RIB_5715	Ascomycota	Archaeorhizomycetes		KF993708	5e-173	98.01
G2655	SSU	G2655__RIB_5783	Ascomycota	Fungi other		KC672723	3e-125	94.85
G2655	SSU	G2655__RIB_6060	Basidiomycota	Agaricomycetes		AY544697	1e-112	99.12
G2655	SSU	G2655__RIB_621	Ascomycota	Leotiomycetes	Helotiales	HQ609486	1e-122	98.41
G2655	SSU	G2655__RIB_6520	Ascomycota	Dothideomycetes	Pleosporales	JN020207	1e-127	99.21
G2655	SSU	G2655__RIB_6575	Glomeromycota	Glomeromycetes	Glomerales	EF023845	1e-126	99.6
G2655	SSU	G2655__RIB_6587	Basidiomycota	Agaricomycetes	Agaricales	KF291053	1e-127	99.6
G2655	SSU	G2655__RIB_6591	Basidiomycota	Agaricomycetes		EF024891	0	98.78
G2655	SSU	G2655__RIB_6723	Ascomycota	Orbiliomycetes	Orbiliales	EF024651	0	97.83
G2655	SSU	G2655__RIB_6803	Ascomycota	Eurotiomycetes	Chaetothyriales	FJ358326	2e-162	97.89
G2655	SSU	G2655__RIB_6853	Basidiomycota	Fungi other		AFRT01001168	6e-123	94.46
G2655	SSU	G2655__RIB_7065	Ascomycota	Fungi other	Hypocreales	KC670704	2e-62	99.25
G2655	SSU	G2655__RIB_7263	Ascomycota	Fungi other		DQ248314	2e-61	99.25
G2655	SSU	G2655__RIB_7273	Basidiomycota	Fungi other	Platygloeales	AY123302	2e-55	96.92
G2655	SSU	G2655__RIB_74	Basidiomycota	Agaricomycetes	Agaricales	GU187659	0	98.32
G2655	SSU	G2655__RIB_7452	Mortierellomycota	Mortierellomycetes	Mortierellales	EF023934	2e-129	100
G2655	SSU	G2655__RIB_7631	Basidiomycota	Mixiomycetes	Mixiales	BABT02000083	3e-89	94.09
G2655	SSU	G2655__RIB_7641	Ascomycota	Dothideomycetes		EF638687	4e-112	96.02
G2655	SSU	G2655__RIB_7704	Basidiomycota	Agaricomycetes	Corticiales	AF334910	4e-115	99.56
G2655	SSU	G2655__RIB_771	Ascomycota	Leotiomycetes	Helotiales	AJ496249	4e-134	98.53
G2655	SSU	G2655__RIB_7738	Basidiomycota	Agaricomycetes	Boletales	AEQB01000388	1e-108	98.25
G2655	SSU	G2655__RIB_7767	Ascomycota	Sordariomycetes		AB220227	1e-158	95.99
G2655	SSU	G2655__RIB_7772	Basidiomycota	Agaricomycetes	Polyporales	GU187611	7e-115	96.44
G2655	SSU	G2655__RIB_7948	Glomeromycota	Glomeromycetes	Glomerales	DQ336448	0	98.45
G2655	SSU	G2655__RIB_8290	Ascomycota	Sordariomycetes		GALN01475575	5e-121	98.39
G2655	SSU	G2655__RIB_8300	Ascomycota	Fungi other		GQ154634	7e-50	99.1
G2655	SSU	G2655__RIB_8518	Ascomycota	Archaeorhizomycetes		JF836023	0	98.35
G2655	SSU	G2655__RIB_855	Ascomycota	Geoglossomycetes	Geoglossales	KC672479	3e-113	98.7
G2657	SSU	G2657__RIB_1004	Basidiomycota	Agaricomycetes	Russulales	U59093	0	99.27
G2657	SSU	G2657__RIB_103	Basidiomycota	Agaricomycetes		AY382472	4e-122	98.79
G2657	SSU	G2657__RIB_1080	Basidiomycota	Agaricomycetes	Russulales	DQ457626	2e-87	97.87
G2657	SSU	G2657__RIB_1082	Basidiomycota	Agaricomycetes	Russulales	DQ911615	6e-136	97.54
G2657	SSU	G2657__RIB_11	Basidiomycota	Agaricomycetes	Russulales	AY293156	6e-141	99.64
G2657	SSU	G2657__RIB_1122	Basidiomycota	Agaricomycetes	Russulales	AY707093	0	98.24
G2657	SSU	G2657__RIB_1195	Basidiomycota	Agaricomycetes		KC673286	9e-129	100
G2657	SSU	G2657__RIB_1250	Basidiomycota	Agaricomycetes	Boletales	DQ534689	1e-122	98.41
G2657	SSU	G2657__RIB_1276	Basidiomycota	Agaricomycetes	Russulales	AY293156	0	99.21
G2657	SSU	G2657__RIB_130	Basidiomycota	Agaricomycetes	Agaricales	AY752967	2e-124	98.8
G2657	SSU	G2657__RIB_1306	Ascomycota	Eurotiomycetes	Chaetothyriales	KC672693	4e-137	100
G2657	SSU	G2657__RIB_1568	Basidiomycota	Agaricomycetes	Russulales	AEOJ01000011	4e-102	97.29
G2657	SSU	G2657__RIB_1639	Basidiomycota	Agaricomycetes	Russulales	AF334918	0	97.2
G2657	SSU	G2657__RIB_1657	Ascomycota	Sordariomycetes		KC790496	1e-153	99.01
G2657	SSU	G2657__RIB_166	Ascomycota	Eurotiomycetes		KC337077	2e-129	100
G2657	SSU	G2657__RIB_1775	Basidiomycota	Agaricomycetes	Russulales	AEOJ01000011	3e-113	97.5
G2657	SSU	G2657__RIB_1787	Ascomycota	Dothideomycetes	Botryosphaeriales	DQ678000	0	99.74
G2657	SSU	G2657__RIB_1865	Basidiomycota	Agaricomycetes	Agaricales	U62538	2e-80	98.26
G2657	SSU	G2657__RIB_188	Basidiomycota	Agaricomycetes	Trechisporales	AY657012	5e-121	98.39
G2657	SSU	G2657__RIB_1939	Ascomycota	Eurotiomycetes	Eurotiales	KC670680	1e-127	99.6
G2657	SSU	G2657__RIB_1955	Basidiomycota	Agaricomycetes	Russulales	AY707093	0	98.29
G2657	SSU	G2657__RIB_1969	Basidiomycota	Agaricomycetes	Agaricales	L36659	3e-166	98.5
G2657	SSU	G2657__RIB_2025	Basidiomycota	Agaricomycetes		KC672636	0	99.72
G2657	SSU	G2657__RIB_2028	Basidiomycota	Agaricomycetes	Russulales	AY293156	1e-127	99.6
G2657	SSU	G2657__RIB_2066	Basidiomycota	Agaricomycetes	Russulales	AY293156	4e-122	98.4
G2657	SSU	G2657__RIB_2096	Ascomycota	Sordariomycetes		AJ301954	5e-116	99.14
G2657	SSU	G2657__RIB_2123	Basidiomycota	Agaricomycetes	Russulales	U59093	1e-127	99.6
G2657	SSU	G2657__RIB_2126	Basidiomycota	Fungi other		KC671442	3e-68	99.31
G2657	SSU	G2657__RIB_2137	Basidiomycota	Agaricomycetes	Russulales	U59093	0	99.55
G2657	SSU	G2657__RIB_2154	Basidiomycota	Agaricomycetes		AY382472	6e-76	100
G2657	SSU	G2657__RIB_2174	Basidiomycota	Agaricomycetes	Russulales	AY293156	1e-139	97.3
G2657	SSU	G2657__RIB_2187	Basidiomycota	Agaricomycetes	Agaricales	L36658	1e-127	99.6
G2657	SSU	G2657__RIB_2257	Basidiomycota	Agaricomycetes		HQ728539	4e-153	99.66
G2657	SSU	G2657__RIB_236	Chytridiomycota	Chytridiomycetes	Chytridiales	AY635825	2e-109	96.28
G2657	SSU	G2657__RIB_2459	Basidiomycota	Agaricomycetes	Russulales	AY293156	1e-178	99.71
G2657	SSU	G2657__RIB_2479	Basidiomycota	Agaricomycetes	Russulales	U59093	3e-128	99.6
G2657	SSU	G2657__RIB_2579	Basidiomycota	Agaricomycetes	Agaricales	KF291205	4e-142	98.94
G2657	SSU	G2657__RIB_2604	Basidiomycota	Agaricomycetes	Russulales	AEOJ01000011	2e-86	96.89
G2657	SSU	G2657__RIB_2622	Basidiomycota	Agaricomycetes	Russulales	AY665778	3e-165	97.38
G2657	SSU	G2657__RIB_2722	Ascomycota	Geoglossomycetes	Geoglossales	KC671703	2e-120	98
G2657	SSU	G2657__RIB_2839	Chytridiomycota	Chytridiomycetes	Rhizophlyctidales	DQ244014	5e-126	99.2
G2657	SSU	G2657__RIB_2873	Basidiomycota	Fungi other	Atheliales	M55638	3e-64	99.27
G2657	SSU	G2657__RIB_2887	Basidiomycota	Tremellomycetes	Tremellales	GU327540	2e-114	96.41
G2657	SSU	G2657__RIB_2965	Neocallimastigomycota	Neocallimastigomycetes	Neocallimastigales	EU910609	4e-102	93.68
G2657	SSU	G2657__RIB_2985	Basidiomycota	Agaricomycetes	Russulales	AY707093	5e-126	97.72
G2657	SSU	G2657__RIB_3024	Basidiomycota	Agaricomycetes	Russulales	AY293156	2e-126	97.04
G2657	SSU	G2657__RIB_3059	Basidiomycota	Agaricomycetes	Russulales	DQ457626	1e-168	95.21
G2657	SSU	G2657__RIB_3074	Basidiomycota	Agaricomycetes	Russulales	AY707093	0	99.17
G2657	SSU	G2657__RIB_3082	Basidiomycota	Fungi other		DQ873646	4e-62	94.84
G2657	SSU	G2657__RIB_31	Basidiomycota	Agaricomycetes		AY382472	2e-155	99.67
G2657	SSU	G2657__RIB_3200	Chytridiomycota	Chytridiomycetes	Rhizophydiales	DQ536479	2e-119	97.61
G2657	SSU	G2657__RIB_3203	Ascomycota	Sordariomycetes	Xylariales	AB274812	2e-166	97.39
G2657	SSU	G2657__RIB_3241	Basidiomycota	Agaricomycetes	Corticiales	DQ915464	3e-128	99.6
G2657	SSU	G2657__RIB_3259	Basidiomycota	Agaricomycetes	Russulales	U59093	4e-127	99.6
G2657	SSU	G2657__RIB_3263	Chytridiomycota	Chytridiomycetes		KC670541	5e-126	99.2
G2657	SSU	G2657__RIB_3270	Basidiomycota	Agaricomycetes	Agaricales	DQ444855	1e-117	97.21
G2657	SSU	G2657__RIB_3273	Basidiomycota	Agaricomycetes	Agaricales	DQ851577	7e-110	95.93
G2657	SSU	G2657__RIB_3315	Ascomycota	Dothideomycetes	Pleosporales	KC670783	0	99.53
G2657	SSU	G2657__RIB_3324	Basidiomycota	Agaricomycetes		AF026627	0	99.53
G2657	SSU	G2657__RIB_3381	Ascomycota	Dothideomycetes	Pleosporales	U04202	1e-126	99.6
G2657	SSU	G2657__RIB_3382	Basidiomycota	Agaricomycetes	Agaricales	KF291167	2e-124	98.81
G2657	SSU	G2657__RIB_3387	Basidiomycota	Agaricomycetes	Russulales	AY293156	0	97.64
G2657	SSU	G2657__RIB_36	Basidiomycota	Agaricomycetes	Russulales	AY707093	1e-132	98.87
G2657	SSU	G2657__RIB_3604	Basidiomycota	Agaricomycetes	Russulales	AY707093	3e-143	99.64
G2657	SSU	G2657__RIB_3915	Basidiomycota	Agaricomycetes		KC672517	1e-127	99.6
G2657	SSU	G2657__RIB_3923	Mortierellomycota	Mortierellomycetes	Mortierellales	KC215422	2e-129	100
G2657	SSU	G2657__RIB_3950	Basidiomycota	Agaricomycetes		DQ092920	0	99.18
G2657	SSU	G2657__RIB_4006	Basidiomycota	Agaricomycetes		KC672651	2e-105	99.53
G2657	SSU	G2657__RIB_4013	Basidiomycota	Agaricomycetes	Russulales	U59093	1e-152	99.66
G2657	SSU	G2657__RIB_4055	Basidiomycota	Agaricomycetes	Russulales	DQ911615	2e-113	97.5
G2657	SSU	G2657__RIB_4079	Basidiomycota	Agaricomycetes		KC672651	2e-125	99.2
G2657	SSU	G2657__RIB_4166	Basidiomycota	Agaricomycetes		AY382468	2e-104	96.14
G2657	SSU	G2657__RIB_4167	Chytridiomycota	Chytridiomycetes	Chytridiales	DQ536487	3e-58	99.21
G2657	SSU	G2657__RIB_419	Basidiomycota	Agaricomycetes	Agaricales	AF076381	5e-91	99.46
G2657	SSU	G2657__RIB_4262	Basidiomycota	Agaricomycetes		AY382472	1e-127	99.6
G2657	SSU	G2657__RIB_4325	Basidiomycota	Agaricomycetes		KC673286	7e-95	100
G2657	SSU	G2657__RIB_437	Basidiomycota	Agaricomycetes	Russulales	U59093	1e-127	99.6
G2657	SSU	G2657__RIB_4476	Basidiomycota	Agaricomycetes		KC672651	5e-126	99.2
G2657	SSU	G2657__RIB_4539	Basidiomycota	Agaricomycetes	Agaricales	L36658	8e-155	100
G2657	SSU	G2657__RIB_4565	Ascomycota	Sordariomycetes	Sordariales	GALN01477166	0	99.28
G2657	SSU	G2657__RIB_4796	Basidiomycota	Agaricomycetes	Agaricales	AF287834	0	98.98
G2657	SSU	G2657__RIB_4846	Basidiomycota	Agaricomycetes	Russulales	AF026605	1e-122	96.3
G2657	SSU	G2657__RIB_4966	Basidiomycota	Tremellomycetes	Tremellales	EF023723	1e-127	99.6
G2657	SSU	G2657__RIB_4977	Basidiomycota	Agaricomycetes		EF053586	1e-127	99.6
G2657	SSU	G2657__RIB_5006	Basidiomycota	Agaricomycetes	Russulales	AY293156	0	99.76
G2657	SSU	G2657__RIB_5072	Basidiomycota	Agaricomycetes	Russulales	AY293156	0	99.18
G2657	SSU	G2657__RIB_5140	Basidiomycota	Agaricomycetes	Russulales	AY707093	7e-100	99.5
G2657	SSU	G2657__RIB_5181	Basidiomycota	Agaricomycetes	Russulales	AEOJ01000011	2e-77	96.61
G2657	SSU	G2657__RIB_5230	Basidiomycota	Agaricomycetes	Russulales	U59093	0	99.32
G2657	SSU	G2657__RIB_5307	Mortierellomycota	Mortierellomycetes	Mortierellales	EF024997	2e-91	100
G2657	SSU	G2657__RIB_5327	Ascomycota	Sordariomycetes	Sordariales	AY706333	0	99.37
G2657	SSU	G2657__RIB_538	Basidiomycota	Agaricomycetes	Russulales	AY707093	1e-127	99.6
G2657	SSU	G2657__RIB_5635	Basidiomycota	Agaricomycetes	Agaricales	DQ444861	0	98.38
G2657	SSU	G2657__RIB_5734	Basidiomycota	Agaricomycetes	Russulales	U59093	1e-127	99.6
G2657	SSU	G2657__RIB_5795	Basidiomycota	Agaricomycetes		AY916439	4e-127	99.6
G2657	SSU	G2657__RIB_5998	Basidiomycota	Fungi other		EF023509	5e-99	94.85
G2657	SSU	G2657__RIB_6002	Basidiomycota	Agaricomycetes	Russulales	AY293156	3e-149	99.66
G2657	SSU	G2657__RIB_6075	Basidiomycota	Agaricomycetes	Russulales	U59093	1e-173	98.55
G2657	SSU	G2657__RIB_6139	Basidiomycota	Agaricomycetes	Polyporales	AEOV01000708	1e-160	98.16
G2657	SSU	G2657__RIB_6194	Basidiomycota	Agaricomycetes		DQ511039	4e-127	99.6
G2657	SSU	G2657__RIB_6206	Basidiomycota	Wallemiomycetes	Geminibasidiales	JX242894	1e-127	99.6
G2657	SSU	G2657__RIB_6316	Ascomycota	Sordariomycetes		AJ301941	3e-146	98.32
G2657	SSU	G2657__RIB_6362	Basidiomycota	Agaricomycetes	Russulales	AY707093	0	99.71
G2657	SSU	G2657__RIB_651	Basidiomycota	Agaricomycetes	Russulales	AY293156	1e-87	99.44
G2657	SSU	G2657__RIB_655	Basidiomycota	Agaricomycetes	Russulales	AY293156	0	99.54
G2657	SSU	G2657__RIB_657	Ascomycota	Fungi other	Lecanorales	AF455132	7e-55	92.21
G2657	SSU	G2657__RIB_6718	Chytridiomycota	Chytridiomycetes	Rhizophydiales	GQ995437	4e-127	99.6
G2657	SSU	G2657__RIB_676	Basidiomycota	Fungi other	Russulales	U59068	3e-63	97.22
G2657	SSU	G2657__RIB_6768	Ascomycota	Dothideomycetes	Pleosporales	DQ678032	1e-127	99.6
G2657	SSU	G2657__RIB_6792	Basidiomycota	Agaricomycetes	Russulales	AY293156	0	99.45
G2657	SSU	G2657__RIB_6829	Basidiomycota	Agaricomycetes	Agaricales	L36659	1e-138	97.26
G2657	SSU	G2657__RIB_6916	Basidiomycota	Agaricomycetes	Russulales	AY707093	5e-157	99.67
G2657	SSU	G2657__RIB_6967	Ascomycota	Eurotiomycetes	Eurotiales	ACJE01000015	2e-87	99.44
G2657	SSU	G2657__RIB_7074	Basidiomycota	Agaricomycetes	Russulales	AY293156	3e-139	98.92
G2657	SSU	G2657__RIB_7079	Chytridiomycota	Chytridiomycetes		KC670541	1e-121	98.39
G2657	SSU	G2657__RIB_7087	Mortierellomycota	Mortierellomycetes	Mortierellales	JN054669	0	99.76
G2657	SSU	G2657__RIB_7127	Basidiomycota	Agaricomycetes		KC672636	2e-129	100
G2657	SSU	G2657__RIB_7158	Basidiomycota	Tremellomycetes	Tremellales	AY766081	6e-81	91.78
G2657	SSU	G2657__RIB_7254	Basidiomycota	Agaricomycetes	Russulales	AY707093	3e-179	98.6
G2657	SSU	G2657__RIB_7339	Basidiomycota	Fungi other		KC672516	9e-52	99.13
G2657	SSU	G2657__RIB_7382	Basidiomycota	Agaricomycetes	Russulales	AY293156	0	99.22
G2657	SSU	G2657__RIB_7475	Basidiomycota	Agaricomycetes		JN368229	6e-76	99.37
G2657	SSU	G2657__RIB_748	Ascomycota	Pezizomycetes	Pezizales	AM748735	0	99.48
G2657	SSU	G2657__RIB_7547	Basidiomycota	Wallemiomycetes	Geminibasidiales	JX242894	0	99.73
G2657	SSU	G2657__RIB_7554	Ascomycota	Fungi other	Sordariales	ADUW01000001	9e-59	99.21
G2657	SSU	G2657__RIB_7591	Basidiomycota	Agaricomycetes		AY382472	1e-127	99.6
G2657	SSU	G2657__RIB_811	Basidiomycota	Tremellomycetes		DQ511017	1e-127	99.6
G2657	SSU	G2657__RIB_8134	Basidiomycota	Agaricomycetes	Russulales	AY293156	0	99.74
G2657	SSU	G2657__RIB_8174	Basidiomycota	Agaricomycetes		KC671360	0	99.12
G2657	SSU	G2657__RIB_819	Basidiomycota	Agaricomycetes	Russulales	AY707093	9e-119	97.98
G2657	SSU	G2657__RIB_82	Basidiomycota	Agaricomycetes		EF053586	1e-127	99.6
G2657	SSU	G2657__RIB_8215	Basidiomycota	Agaricomycetes	Russulales	AY293156	0	99.14
G2657	SSU	G2657__RIB_8390	Basidiomycota	Agaricomycetes		KC672517	2e-130	99.61
G2657	SSU	G2657__RIB_8463	Chytridiomycota	Chytridiomycetes	Rhizophydiales	DQ536479	4e-72	96.93
G2657	SSU	G2657__RIB_8507	Ascomycota	Geoglossomycetes	Geoglossales	KC671703	1e-127	99.6
G2657	SSU	G2657__RIB_8598	Basidiomycota	Agaricomycetes	Russulales	AY293156	0	98.01
G2657	SSU	G2657__RIB_8612	Chytridiomycota	Chytridiomycetes	Chytridiales	AY635825	7e-105	94.07
G2657	SSU	G2657__RIB_8778	Basidiomycota	Agaricomycetes		AY654890	0	99.39
G2657	SSU	G2657__RIB_8862	Mortierellomycota	Mortierellomycetes	Mortierellales	EF024467	1e-127	99.6
G2657	SSU	G2657__RIB_923	Basidiomycota	Agaricomycetes	Agaricales	KF291205	0	99.22
G2657	SSU	G2657__RIB_959	Chytridiomycota	Chytridiomycetes	Chytridiales	AY635825	1e-90	96.12
G2658	SSU	G2658__RIB_10053	Basidiomycota	Agaricomycetes		AY757265	0	99.09
G2658	SSU	G2658__RIB_10069	Ascomycota	Eurotiomycetes	Eurotiales	FJ947527	1e-89	99.45
G2658	SSU	G2658__RIB_10143	Basidiomycota	Agaricomycetes		AY916428	4e-127	99.6
G2658	SSU	G2658__RIB_10158	Ascomycota	Eurotiomycetes		KC337077	2e-129	100
G2658	SSU	G2658__RIB_10182	Basidiomycota	Agaricomycetes		KC670548	0	99.33
G2658	SSU	G2658__RIB_1027	Basidiomycota	Agaricomycetes	Corticiales	EU622847	3e-73	99.35
G2658	SSU	G2658__RIB_10461	Ascomycota	Archaeorhizomycetes		JF836020	3e-94	97.54
G2658	SSU	G2658__RIB_10475	Ascomycota	Lecanoromycetes	Lecanorales	L37532	3e-94	98
G2658	SSU	G2658__RIB_10478	Ascomycota	Sordariomycetes	Hypocreales	AB003950	0	99.8
G2658	SSU	G2658__RIB_10580	Basidiomycota	Tremellomycetes	Tremellales	AY766081	3e-89	99.45
G2658	SSU	G2658__RIB_10610	Chytridiomycota	Chytridiomycetes	Cladochytriales	AY635835	2e-115	96.81
G2658	SSU	G2658__RIB_10626	Basidiomycota	Agaricomycetes	Russulales	AY707093	7e-145	99.65
G2658	SSU	G2658__RIB_10739	Ascomycota	Eurotiomycetes	Eurotiales	AAKD03000144	7e-115	99.13
G2658	SSU	G2658__RIB_10825	Basidiomycota	Agaricomycetes		U09535	7e-115	99.13
G2658	SSU	G2658__RIB_11043	Basidiomycota	Fungi other	Trechisporales	JQ689450	2e-55	99.17
G2658	SSU	G2658__RIB_11174	Basidiomycota	Agaricomycetes		EF024470	1e-79	99.39
G2658	SSU	G2658__RIB_11193	Basidiomycota	Agaricomycetes	Agaricales	KF291181	3e-149	96.85
G2658	SSU	G2658__RIB_11222	Ascomycota	Fungi other		KC670704	8e-171	93.58
G2658	SSU	G2658__RIB_11281	Ascomycota	Geoglossomycetes	Geoglossales	KC672479	5e-116	97.19
G2658	SSU	G2658__RIB_1132	Basidiomycota	Agaricomycetes	Russulales	AY707093	2e-124	98.8
G2658	SSU	G2658__RIB_11339	Basidiomycota	Agaricomycetes		AY916431	1e-127	99.6
G2658	SSU	G2658__RIB_11445	Basidiomycota	Fungi other	Agaricales	L36658	6e-51	100
G2658	SSU	G2658__RIB_11507	Ascomycota	Eurotiomycetes	Chaetothyriales	AJ972862	0	99.35
G2658	SSU	G2658__RIB_11515	Chytridiomycota	Chytridiomycetes	Chytridiales	AY635825	1e-112	96.03
G2658	SSU	G2658__RIB_11544	Ascomycota	Dothideomycetes		L76614	4e-127	99.6
G2658	SSU	G2658__RIB_11553	Ascomycota	Eurotiomycetes	Eurotiales	GU823984	8e-165	99.69
G2658	SSU	G2658__RIB_1164	Glomeromycota	Glomeromycetes	Glomerales	Y17652	1e-121	98.39
G2658	SSU	G2658__RIB_11679	Ascomycota	Fungi other		AF548084	6e-101	91.45
G2658	SSU	G2658__RIB_11726	Basidiomycota	Agaricomycetes	Trechisporales	AY657012	1e-127	99.6
G2658	SSU	G2658__RIB_11804	Ascomycota	Pezizomycetes		AJ496238	0	99.5
G2658	SSU	G2658__RIB_11856	Basidiomycota	Agaricomycetes	Agaricales	DQ457646	0	99.73
G2658	SSU	G2658__RIB_11908	Ascomycota	Leotiomycetes	Helotiales	GQ280420	0	98.91
G2658	SSU	G2658__RIB_11968	Basidiomycota	Agaricomycetes		GU568136	5e-116	97.56
G2658	SSU	G2658__RIB_12009	Basidiomycota	Agaricomycetes	Russulales	AY293156	6e-177	98.85
G2658	SSU	G2658__RIB_12095	Ascomycota	Fungi other		DQ646535	6e-168	91.3
G2658	SSU	G2658__RIB_12103	Basidiomycota	Agaricomycetes	Atheliales	M55638	3e-75	99.36
G2658	SSU	G2658__RIB_12122	Rozellomycota	Rozellomycetes		JN054654	2e-130	97.12
G2658	SSU	G2658__RIB_12356	Ascomycota	Fungi other		FP929119	2e-70	92.11
G2658	SSU	G2658__RIB_12392	Ascomycota	Fungi other		GQ154634	2e-81	94.03
G2658	SSU	G2658__RIB_12453	Ascomycota	Eurotiomycetes	Chaetothyriales	X91898	9e-131	99.61
G2658	SSU	G2658__RIB_12593	Basidiomycota	Agaricomycetes		AY544697	8e-110	99.1
G2658	SSU	G2658__RIB_12644	Ascomycota	Eurotiomycetes		GQ154635	7e-85	99.43
G2658	SSU	G2658__RIB_1266	Ascomycota	Fungi other		KC674734	4e-87	91.85
G2658	SSU	G2658__RIB_12753	Ascomycota	Pezizomycetes	Pezizales	AF104344	1e-177	99.71
G2658	SSU	G2658__RIB_1303	Ascomycota	Sordariomycetes	Sordariales	KC672421	4e-110	98.25
G2658	SSU	G2658__RIB_13060	Ascomycota	Saccharomycetes		DQ519010	3e-89	92.27
G2658	SSU	G2658__RIB_13099	Basidiomycota	Agaricomycetes		EF024735	2e-80	98.82
G2658	SSU	G2658__RIB_13157	Ascomycota	Sordariomycetes	Xylariales	AY722101	5e-96	98.03
G2658	SSU	G2658__RIB_13160	Basidiomycota	Fungi other	Cantharellales	DQ898727	7e-50	97.44
G2658	SSU	G2658__RIB_13191	Ascomycota	Fungi other	Geoglossales	KC672479	6e-61	95.89
G2658	SSU	G2658__RIB_13199	Basidiomycota	Agaricomycetes	Agaricales	HM562282	2e-124	98.8
G2658	SSU	G2658__RIB_13295	Ascomycota	Eurotiomycetes	Eurotiales	EF395944	2e-124	98.8
G2658	SSU	G2658__RIB_13469	Basidiomycota	Agaricomycetes		EF053586	0	99.32
G2658	SSU	G2658__RIB_13739	Basidiomycota	Agaricomycetes	Russulales	AY293156	2e-124	98.8
G2658	SSU	G2658__RIB_13786	Basidiomycota	Agaricomycetes		KC670682	1e-117	97.58
G2658	SSU	G2658__RIB_13791	Basidiomycota	Agaricomycetes	Hymenochaetales	AY771599	0	99.48
G2658	SSU	G2658__RIB_13888	Basidiomycota	Agaricomycetes	Russulales	AY293156	0	99.31
G2658	SSU	G2658__RIB_13895	Ascomycota	Sordariomycetes	Microascales	AY271804	9e-109	95.55
G2658	SSU	G2658__RIB_13924	Basidiomycota	Agaricomycetes		AY544697	0	99.75
G2658	SSU	G2658__RIB_14193		Fungi other		JN054669	1e-106	94.53
G2658	SSU	G2658__RIB_14483	Ascomycota	Dothideomycetes	Pleosporales	U04202	1e-127	99.6
G2658	SSU	G2658__RIB_14567	Basidiomycota	Tremellomycetes	Tremellales	GU568124	0	97.18
G2658	SSU	G2658__RIB_14629	Ascomycota	Fungi other		ABPE01001453	0	93.23
G2658	SSU	G2658__RIB_14679	Basidiomycota	Wallemiomycetes	Geminibasidiales	JX242890	1e-127	99.6
G2658	SSU	G2658__RIB_14753	Basidiomycota	Agaricomycetes	Trechisporales	AY657012	0	98.73
G2658	SSU	G2658__RIB_14774	Ascomycota	Eurotiomycetes	Eurotiales	EF395944	4e-127	99.6
G2658	SSU	G2658__RIB_14783	Basidiomycota	Agaricomycetes	Agaricales	L36659	0	97.36
G2658	SSU	G2658__RIB_14846	Basidiomycota	Fungi other		AY293156	4e-159	94.09
G2658	SSU	G2658__RIB_14940	Ascomycota	Dothideomycetes	Pleosporales	U43463	1e-163	95.82
G2658	SSU	G2658__RIB_14980	Basidiomycota	Agaricomycetes	Russulales	AY293156	0	99.22
G2658	SSU	G2658__RIB_15175	Basidiomycota	Agaricomycetes		AY382458	9e-94	95.81
G2658	SSU	G2658__RIB_15184	Ascomycota	Dothideomycetes		L76618	4e-163	99.37
G2658	SSU	G2658__RIB_15202	Ascomycota	Dothideomycetes		L76616	3e-84	99.42
G2658	SSU	G2658__RIB_15396	Mucoromycota	Mucoromycetes	Endogonales	JF414210	1e-168	91.86
G2658	SSU	G2658__RIB_15418	Ascomycota	Eurotiomycetes	Chaetothyriales	AB007685	3e-170	98.53
G2658	SSU	G2658__RIB_15512	Ascomycota	Sordariomycetes	uncultured	AY382465	0	99.72
G2658	SSU	G2658__RIB_15650	Ascomycota	Dothideomycetes	Mytilinidiales	GU250923	3e-155	95.16
G2658	SSU	G2658__RIB_15674	Basidiomycota	Agaricomycetes	Russulales	AY707093	2e-171	98.27
G2658	SSU	G2658__RIB_15677	Ascomycota	Geoglossomycetes	Geoglossales	KC671703	1e-127	99.6
G2658	SSU	G2658__RIB_15708	Basidiomycota	Fungi other		GU568151	6e-177	93.93
G2658	SSU	G2658__RIB_15855	Ascomycota	Fungi other		KC670704	4e-138	92.94
G2658	SSU	G2658__RIB_15928	Basidiomycota	Agaricomycetes		AY916428	5e-126	99.2
G2658	SSU	G2658__RIB_15960	Ascomycota	Dothideomycetes		GU296171	2e-125	99.2
G2658	SSU	G2658__RIB_16061	Basidiomycota	Agaricomycetes		AY916732	0	99.09
G2658	SSU	G2658__RIB_16096	Chytridiomycota	Chytridiomycetes	Chytridiales	DQ536486	2e-171	96.69
G2658	SSU	G2658__RIB_16274	Ascomycota	Fungi other		KF152942	0	94.44
G2658	SSU	G2658__RIB_16282	Basidiomycota	Agaricomycetes		KC671421	4e-72	98.7
G2658	SSU	G2658__RIB_1632	Basidiomycota	Agaricomycetes	Russulales	AY707093	5e-121	98.39
G2658	SSU	G2658__RIB_16374	Basidiomycota	Agaricomycetes	Gomphales	AY293138	7e-125	99.2
G2658	SSU	G2658__RIB_16474	Ascomycota	Sordariomycetes		JX066710	2e-109	98.24
G2658	SSU	G2658__RIB_16516	Basidiomycota	Agaricomycetes		DQ092920	7e-95	95.43
G2658	SSU	G2658__RIB_1662	Basidiomycota	Wallemiomycetes	Geminibasidiales	JX242890	0	99.78
G2658	SSU	G2658__RIB_16699	Ascomycota	Eurotiomycetes	Eurotiales	AAKD03000144	5e-86	98.35
G2658	SSU	G2658__RIB_16737	Basidiomycota	Agaricomycetes	Agaricales	AF076381	3e-89	99.45
G2658	SSU	G2658__RIB_16789	Basidiomycota	Agaricomycetes	Russulales	DQ457626	3e-170	98.25
G2658	SSU	G2658__RIB_16802	Ascomycota	Dothideomycetes	Pleosporales	DQ341091	0	97.14
G2658	SSU	G2658__RIB_16878	Basidiomycota	Agaricostilbomycetes	Agaricostilbales	D64122	2e-151	94.8
G2658	SSU	G2658__RIB_16927	Ascomycota	Sordariomycetes	Hypocreales	AY489680	6e-141	96.1
G2658	SSU	G2658__RIB_1714	Ascomycota	Archaeorhizomycetes		JF836023	0	97.13
G2658	SSU	G2658__RIB_1899	Basidiomycota	Agaricomycetes	Trechisporales	AY803753	2e-105	96.94
G2658	SSU	G2658__RIB_1906	Basidiomycota	Fungi other		U09537	3e-58	99.21
G2658	SSU	G2658__RIB_2061	Ascomycota	Fungi other	Diaporthales	AEGN01000925	3e-69	99.32
G2658	SSU	G2658__RIB_2094	Basidiomycota	Agaricomycetes		DQ511033	2e-124	98.8
G2658	SSU	G2658__RIB_2120	Ascomycota	Archaeorhizomycetes		JF836023	0	99.72
G2658	SSU	G2658__RIB_2134	Basidiomycota	Agaricomycetes	Polyporales	AY336769	4e-122	98.4
G2658	SSU	G2658__RIB_2322	Basidiomycota	Agaricomycetes	Russulales	AY293156	6e-156	99.34
G2658	SSU	G2658__RIB_246	Ascomycota	Eurotiomycetes	Eurotiales	JN397370	2e-129	100
G2658	SSU	G2658__RIB_2520	Basidiomycota	Agaricomycetes	Polyporales	AY336769	0	99.77
G2658	SSU	G2658__RIB_2544	Ascomycota	Sordariomycetes	Microascales	HQ908495	9e-160	97.3
G2658	SSU	G2658__RIB_2844	Basidiomycota	Agaricomycetes		EF023488	2e-117	98.35
G2658	SSU	G2658__RIB_285	Basidiomycota	Agaricomycetes		AY382472	0	99.73
G2658	SSU	G2658__RIB_2853	Ascomycota	Fungi other	Chaetothyriales	U42473	5e-67	97.97
G2658	SSU	G2658__RIB_2911	Basidiomycota	Agaricomycetes	Russulales	DQ457626	3e-121	98.02
G2658	SSU	G2658__RIB_3037	Ascomycota	Sordariomycetes	Hypocreales	KC670551	2e-75	97.6
G2658	SSU	G2658__RIB_3062	Ascomycota	Sordariomycetes	Microascales	AF050482	4e-122	98.41
G2658	SSU	G2658__RIB_3288	Ascomycota	Dothideomycetes		EU442278	1e-122	98.41
G2658	SSU	G2658__RIB_3479	Basidiomycota	Agaricomycetes		EF024011	2e-125	99.2
G2658	SSU	G2658__RIB_3783	Basidiomycota	Tremellomycetes	Tremellales	GU568124	3e-133	99.24
G2658	SSU	G2658__RIB_3948	Ascomycota	Dothideomycetes	Mytilinidiales	DQ678030	3e-98	95.96
G2658	SSU	G2658__RIB_3980	Ascomycota	Eurotiomycetes	Eurotiales	GU568129	1e-127	99.6
G2658	SSU	G2658__RIB_3988	Basidiomycota	Agaricomycetes	Russulales	AY707093	0	99.09
G2658	SSU	G2658__RIB_4098	Basidiomycota	Agaricomycetes	Russulales	AY293156	5e-136	99.62
G2658	SSU	G2658__RIB_4136	Ascomycota	Eurotiomycetes	Chaetothyriales	KC672693	4e-84	100
G2658	SSU	G2658__RIB_4279	Ascomycota	Sordariomycetes	Hypocreales	AM114817	7e-127	99.21
G2658	SSU	G2658__RIB_4347	Ascomycota	Eurotiomycetes	Onygenales	AB075362	1e-70	98.68
G2658	SSU	G2658__RIB_4429	Basidiomycota	Agaricomycetes		EF023488	5e-152	99.66
G2658	SSU	G2658__RIB_4460	Basidiomycota	Agaricomycetes	Russulales	AY293156	6e-136	98.9
G2658	SSU	G2658__RIB_4516	Kickxellomycota	Kickxellomycetes	Kickxellales	AB287987	0	99.72
G2658	SSU	G2658__RIB_4564	Basidiomycota	Agaricomycetes		KC673393	6e-76	97.6
G2658	SSU	G2658__RIB_4609	Basidiomycota	Agaricomycetes	Cantharellales	AY757262	1e-143	97.65
G2658	SSU	G2658__RIB_4778	Ascomycota	Fungi other	Chaetothyriales	KC672693	2e-50	100
G2658	SSU	G2658__RIB_480	Ascomycota	Eurotiomycetes	Chaetothyriales	FJ358326	0	98.97
G2658	SSU	G2658__RIB_4977	Basidiomycota	Agaricomycetes	Russulales	U59093	0	98.43
G2658	SSU	G2658__RIB_5123	Ascomycota	Eurotiomycetes	Onygenales	AY177295	0	98.3
G2658	SSU	G2658__RIB_5178	Rozellomycota	Rozellomycetes		HM628670	0	98.13
G2658	SSU	G2658__RIB_5244	Ascomycota	Fungi other	Onygenales	ABIS01004081	4e-67	97.97
G2658	SSU	G2658__RIB_529	Basidiomycota	Agaricomycetes	Agaricales	DQ851572	2e-124	98.8
G2658	SSU	G2658__RIB_5418	Ascomycota	Eurotiomycetes	Eurotiales	AB003945	4e-122	99.18
G2658	SSU	G2658__RIB_55	Basidiomycota	Fungi other	Russulales	DQ457626	1e-58	97.06
G2658	SSU	G2658__RIB_5535	Basidiomycota	Agaricomycetes	Trechisporales	AY657012	0	98.47
G2658	SSU	G2658__RIB_5611	Mortierellomycota	Mortierellomycetes	Mortierellales	EF023186	0	95.8
G2658	SSU	G2658__RIB_5627	Basidiomycota	Tremellomycetes		HM136632	3e-79	98.8
G2658	SSU	G2658__RIB_5683	Basidiomycota	Agaricomycetes	Trechisporales	JQ689450	1e-106	99.53
G2658	SSU	G2658__RIB_5770	Basidiomycota	Fungi other	Agaricales	AF076384	2e-62	99.25
G2658	SSU	G2658__RIB_5831	Basidiomycota	Agaricomycetes	Russulales	AY707093	1e-127	99.6
G2658	SSU	G2658__RIB_5835	Basidiomycota	Agaricomycetes		KC670548	3e-179	99.71
G2658	SSU	G2658__RIB_5869	Ascomycota	Fungi other		JQ747492	6e-61	92.73
G2658	SSU	G2658__RIB_5888	Basidiomycota	Agaricomycetes		EF023646	5e-126	99.2
G2658	SSU	G2658__RIB_5898	Ascomycota	Fungi other	Chaetothyriales	KC672693	9e-69	99.31
G2658	SSU	G2658__RIB_6032	Ascomycota	Sordariomycetes	Ophiostomatales	M85053	1e-77	99.38
G2658	SSU	G2658__RIB_6045	Basidiomycota	Agaricomycetes	Russulales	AY707093	0	99.02
G2658	SSU	G2658__RIB_6062	Basidiomycota	Agaricomycetes	Russulales	DQ457626	5e-92	97.96
G2658	SSU	G2658__RIB_6141	Basidiomycota	Agaricomycetes		KC672636	1e-127	99.6
G2658	SSU	G2658__RIB_6186	Ascomycota	Fungi other	Eurotiales	AB033528	2e-55	98.39
G2658	SSU	G2658__RIB_6197	Basidiomycota	Agaricomycetes	Russulales	U59093	3e-88	99.44
G2658	SSU	G2658__RIB_6420	Basidiomycota	Agaricomycetes	Russulales	AY707093	1e-117	97.22
G2658	SSU	G2658__RIB_653	Ascomycota	Dothideomycetes	Pleosporales	KC674481	2e-119	97.61
G2658	SSU	G2658__RIB_6559	Mucoromycota	Mucoromycetes	Endogonales	DQ536471	5e-173	95.78
G2658	SSU	G2658__RIB_6776	Basidiomycota	Agaricomycetes	Russulales	AY293156	3e-103	95
G2658	SSU	G2658__RIB_682	Basidiomycota	Agaricomycetes		DQ511230	1e-127	99.6
G2658	SSU	G2658__RIB_6938	Basidiomycota	Agaricomycetes	Trechisporales	AY657012	0	99.46
G2658	SSU	G2658__RIB_699	Ascomycota	Archaeorhizomycetes		JF836023	8e-111	98.26
G2658	SSU	G2658__RIB_6999	Entomophthoromycota	Entomophthoromycetes	Entomophthorales	AF368507	0	98.22
G2658	SSU	G2658__RIB_7009	Basidiomycota	Agaricomycetes	Russulales	AY707093	3e-174	99.41
G2658	SSU	G2658__RIB_7014	Basidiomycota	Agaricomycetes	Russulales	AY707093	2e-124	98.8
G2658	SSU	G2658__RIB_7208	Basidiomycota	Agaricomycetes		JN940322	1e-127	99.6
G2658	SSU	G2658__RIB_7271	Basidiomycota	Agaricomycetes	Trechisporales	GU576574	0	99.74
G2658	SSU	G2658__RIB_7341	Basidiomycota	Tremellomycetes	Tremellales	EF023923	4e-82	94.9
G2658	SSU	G2658__RIB_7352	Ascomycota	Leotiomycetes	Helotiales	AY524843	3e-174	99.41
G2658	SSU	G2658__RIB_7412	Basidiomycota	Agaricomycetes		EF024735	5e-108	98.65
G2658	SSU	G2658__RIB_742	Glomeromycota	Glomeromycetes	Diversisporales	AM418543	5e-101	93.57
G2658	SSU	G2658__RIB_7525	Basidiomycota	Agaricomycetes	Trechisporales	GU568151	1e-152	99.66
G2658	SSU	G2658__RIB_7538	Ascomycota	Fungi other	Erysiphales	AOLT01018271	2e-61	97.18
G2658	SSU	G2658__RIB_7632	Ascomycota	Fungi other		KF993708	1e-57	98.44
G2658	SSU	G2658__RIB_7693	Ascomycota	Fungi other		DQ248314	1e-64	96.08
G2658	SSU	G2658__RIB_796	Ascomycota	Eurotiomycetes	Eurotiales	AB008413	1e-121	99.58
G2658	SSU	G2658__RIB_8006	Basidiomycota	Agaricomycetes		KC672636	1e-127	99.6
G2658	SSU	G2658__RIB_807	Basidiomycota	Fungi other	Russulales	U59093	9e-59	99.21
G2658	SSU	G2658__RIB_8225	Basidiomycota	Agaricomycetes		AY544697	1e-127	99.6
G2658	SSU	G2658__RIB_8231	Basidiomycota	Agaricomycetes	Agaricales	L36659	0	98.1
G2658	SSU	G2658__RIB_8232	Basidiomycota	Agaricomycetes	Russulales	AY293156	5e-126	99.2
G2658	SSU	G2658__RIB_8308	Ascomycota	Fungi other	Eurotiales	AJ005446	4e-62	96.58
G2658	SSU	G2658__RIB_8398	Ascomycota	Dothideomycetes	Pleosporales	KC674568	1e-127	99.6
G2658	SSU	G2658__RIB_8464	Basidiomycota	Agaricomycetes	Agaricales	HM562282	7e-161	99.05
G2658	SSU	G2658__RIB_8465	Basidiomycota	Agaricomycetes		AY916428	4e-127	99.6
G2658	SSU	G2658__RIB_8493	Ascomycota	Sordariomycetes	Hypocreales	KC670876	2e-129	100
G2658	SSU	G2658__RIB_8642	Basidiomycota	Agaricomycetes	Boletales	M94340	1e-178	98.32
G2658	SSU	G2658__RIB_865	Basidiomycota	Fungi other	Russulales	U59093	7e-55	99.17
G2658	SSU	G2658__RIB_8729	Basidiomycota	Agaricomycetes		KC670548	0	99.59
G2658	SSU	G2658__RIB_8775	Basidiomycota	Tremellomycetes	Tremellales	AY766081	0	99.18
G2658	SSU	G2658__RIB_8783	Basidiomycota	Agaricomycetes	Agaricales	HM562280	9e-109	95.22
G2658	SSU	G2658__RIB_8901	Ascomycota	Eurotiomycetes	Eurotiales	JN397370	2e-124	99.19
G2658	SSU	G2658__RIB_898	Basidiomycota	Agaricomycetes	Russulales	AY707093	1e-102	99.51
G2658	SSU	G2658__RIB_9099	Basidiomycota	Agaricomycetes	Russulales	AY707093	1e-173	98.84
G2658	SSU	G2658__RIB_9219	Ascomycota	Sordariomycetes	Diaporthales	AB278197	9e-95	96.7
G2658	SSU	G2658__RIB_9251	Glomeromycota	Glomeromycetes	Archaeosporales	KC708375	1e-127	99.6
G2658	SSU	G2658__RIB_9253	Basidiomycota	Tremellomycetes	Tremellales	EF023377	0	99.57
G2658	SSU	G2658__RIB_9368	Basidiomycota	Agaricomycetes		AF026627	0	99.33
G2658	SSU	G2658__RIB_9443	Ascomycota	Fungi other	Pleosporales	KC670583	3e-54	99.16
G2658	SSU	G2658__RIB_9492	Basidiomycota	Agaricomycetes		KC670548	1e-117	97.21
G2658	SSU	G2658__RIB_9560	Basidiomycota	Agaricomycetes	Russulales	DQ457626	0	96.47
G2658	SSU	G2658__RIB_9656	Basidiomycota	Fungi other	Agaricales	JF706311	7e-50	98.25
G2658	SSU	G2658__RIB_9889	Basidiomycota	Agaricomycetes	Trechisporales	AY657012	5e-126	99.2
G2659	SSU	G2659__RIB_1212	Basidiomycota	Agaricomycetes	Boletales	DQ534694	5e-126	99.2
G2659	SSU	G2659__RIB_1588	Ascomycota	Eurotiomycetes		DQ093695	1e-107	98.21
G2659	SSU	G2659__RIB_2155	Basidiomycota	Agaricomycetes	Cantharellales	AFRT01001168	1e-80	99.4
G2659	SSU	G2659__RIB_230	Ascomycota	Sordariomycetes	Hypocreales	AY489696	0	99.72
G2659	SSU	G2659__RIB_2413	Basidiomycota	Agaricomycetes	Boletales	DQ534694	5e-121	98.39
G2659	SSU	G2659__RIB_2760	Basidiomycota	Agaricomycetes	Agaricales	KF381535	0	99.73
G2659	SSU	G2659__RIB_3322	Ascomycota	Archaeorhizomycetes		KF993708	5e-126	99.2
G2659	SSU	G2659__RIB_3333	Ascomycota	Eurotiomycetes	Eurotiales	AB033528	9e-150	98.99
G2659	SSU	G2659__RIB_3597	Basidiomycota	Agaricomycetes	Boletales	DQ534694	2e-125	99.2
G2659	SSU	G2659__RIB_3612	Ascomycota	Fungi other	Ophiostomatales	HQ634826	3e-64	96.05
G2659	SSU	G2659__RIB_4028	Ascomycota	Sordariomycetes	Hypocreales	KC672415	4e-127	99.6
G2659	SSU	G2659__RIB_4395	Basidiomycota	Tremellomycetes	Tremellales	DQ521409	4e-119	98.37
G2659	SSU	G2659__RIB_451	Basidiomycota	Agaricomycetes	Cantharellales	DQ898714	1e-127	99.6
G2659	SSU	G2659__RIB_4791	Ascomycota	Archaeorhizomycetes		JF836023	0	98.88
G2659	SSU	G2659__RIB_5059	Ascomycota	Eurotiomycetes	Onygenales	AY177295	1e-122	98.41
G2659	SSU	G2659__RIB_509	Ascomycota	Sordariomycetes	Hypocreales	ABDF02000071	0	100
G2659	SSU	G2659__RIB_5138	Ascomycota	Eurotiomycetes	Eurotiales	GQ458035	0	99.78
G2659	SSU	G2659__RIB_5340	Basidiomycota	Agaricomycetes		EF024735	8e-166	98.21
G2659	SSU	G2659__RIB_5635	Basidiomycota	Agaricomycetes		AY544697	0	99.79
G2659	SSU	G2659__RIB_5913	Ascomycota	Eurotiomycetes	Eurotiales	AAHF01000017	2e-162	97.61
G2659	SSU	G2659__RIB_596	Ascomycota	Sordariomycetes	Hypocreales	HQ232191	0	99.05
G2659	SSU	G2659__RIB_6066	Basidiomycota	Agaricomycetes	Agaricales	AY657007	2e-124	98.8
G2659	SSU	G2659__RIB_628	Ascomycota	Fungi other		JQ747492	5e-123	92.58
G2659	SSU	G2659__RIB_6516	Basidiomycota	Agaricomycetes	Polyporales	AEOV01000708	1e-164	97.65
G2659	SSU	G2659__RIB_7492	Basidiomycota	Agaricomycetes	Agaricales	KF291053	0	99.52
G2659	SSU	G2659__RIB_815	Ascomycota	Sordariomycetes	Hypocreales	EU710820	0	99.78
G2659	SSU	G2659__RIB_850	Basidiomycota	Agaricomycetes	Cantharellales	AF289662	9e-124	98.8
G2660	SSU	G2660__RIB_0	Ascomycota	Sordariomycetes	Sordariales	KC672421	1e-126	99.6
G2660	SSU	G2660__RIB_10155	Ascomycota	Eurotiomycetes	Eurotiales	KF152942	6e-138	99.63
G2660	SSU	G2660__RIB_10164	Ascomycota	Sordariomycetes	Hypocreales	JX121089	0	99.73
G2660	SSU	G2660__RIB_1017	Basidiomycota	Agaricomycetes	Polyporales	U59082	1e-127	99.6
G2660	SSU	G2660__RIB_10357	Ascomycota	Fungi other	Saccharomycetales	KC674736	4e-60	99.23
G2660	SSU	G2660__RIB_10515	Basidiomycota	Agaricomycetes		EF024608	0	98.27
G2660	SSU	G2660__RIB_10588	Chytridiomycota	Chytridiomycetes		GU568148	1e-127	99.6
G2660	SSU	G2660__RIB_10717	Ascomycota	Sordariomycetes	Sordariales	JQ067909	0	99.39
G2660	SSU	G2660__RIB_10853	Ascomycota	Sordariomycetes	Hypocreales	AB074659	0	99.26
G2660	SSU	G2660__RIB_10952	basidiomycota	Agaricomycetes		KJ417170	5e-121	98.02
G2660	SSU	G2660__RIB_10994	Ascomycota	Lecanoromycetes	Teloschistales	JQ301602	1e-97	92.46
G2660	SSU	G2660__RIB_11333	Ascomycota	Fungi other	Saccharomycetales	KC674736	4e-60	99.23
G2660	SSU	G2660__RIB_11356	Ascomycota	Eurotiomycetes	Eurotiales	JN397370	0	100
G2660	SSU	G2660__RIB_11497	Basidiomycota	Tremellomycetes	Tremellales	AY766081	0	99.15
G2660	SSU	G2660__RIB_1150	Basidiomycota	Agaricomycetes	Agaricales	KF291119	4e-97	96.76
G2660	SSU	G2660__RIB_11552	Basidiomycota	Agaricomycetes		AY544697	3e-128	99.6
G2660	SSU	G2660__RIB_1176	Ascomycota	Sordariomycetes	Hypocreales	GU305992	1e-127	99.6
G2660	SSU	G2660__RIB_11908	Basidiomycota	Agaricomycetes	Agaricales	DQ444856	1e-137	99.63
G2660	SSU	G2660__RIB_12025	Ascomycota	Pezizomycetes	Pezizales	FJ790647	0	95.12
G2660	SSU	G2660__RIB_12214	Basidiomycota	Tremellomycetes	Tremellales	DQ520095	0	99.73
G2660	SSU	G2660__RIB_12382	Ascomycota	Dothideomycetes	Capnodiales	GU250322	2e-171	95.73
G2660	SSU	G2660__RIB_12390	Basidiomycota	Agaricomycetes		EF023509	0	99.75
G2660	SSU	G2660__RIB_12469	Ascomycota	Leotiomycetes	Helotiales	AY256855	2e-120	98.38
G2660	SSU	G2660__RIB_1268	Basidiomycota	Agaricomycetes		DQ092920	0	98.79
G2660	SSU	G2660__RIB_1281	Basidiomycota	Agaricomycetes		KC672636	0	99.72
G2660	SSU	G2660__RIB_1394	Ascomycota	Eurotiomycetes	Eurotiales	JN397370	0	100
G2660	SSU	G2660__RIB_1489	Basidiomycota	Tremellomycetes	Tremellales	GU576573	1e-127	99.6
G2660	SSU	G2660__RIB_1515	Basidiomycota	Tremellomycetes	Tremellales	GU568124	0	99.18
G2660	SSU	G2660__RIB_1602	Ascomycota	Archaeorhizomycetes		KF993708	1e-122	98.41
G2660	SSU	G2660__RIB_1625	Basidiomycota	Agaricomycetes		KC671360	0	98.35
G2660	SSU	G2660__RIB_1630	Basidiomycota	Agaricomycetes	Agaricales	AY705959	4e-112	96.02
G2660	SSU	G2660__RIB_166	Basidiomycota	Agaricomycetes	Agaricales	GU187661	3e-116	98.34
G2660	SSU	G2660__RIB_1779	Basidiomycota	Agaricomycetes	Agaricales	DQ851574	0	96.9
G2660	SSU	G2660__RIB_1826	Mortierellomycota	Mortierellomycetes	Mortierellales	EF024997	2e-178	98.86
G2660	SSU	G2660__RIB_1871	Glomeromycota	Glomeromycetes	Glomerales	AB594850	0	97.32
G2660	SSU	G2660__RIB_2126	Ascomycota	Eurotiomycetes	Onygenales	AB075362	6e-97	98.99
G2660	SSU	G2660__RIB_221	Ascomycota	Fungi other	Chaetothyriales	X91898	6e-66	97.95
G2660	SSU	G2660__RIB_2268	Ascomycota	Pezizomycetes	Pezizales	AF133156	0	99.75
G2660	SSU	G2660__RIB_2328	Basidiomycota	Wallemiomycetes	Geminibasidiales	JX242892	9e-124	99.19
G2660	SSU	G2660__RIB_2345	Ascomycota	Eurotiomycetes	Eurotiales	AB008398	1e-116	97.94
G2660	SSU	G2660__RIB_2417	Basidiomycota	Agaricomycetes	Agaricales	KF291167	1e-127	99.6
G2660	SSU	G2660__RIB_2424	Ascomycota	Eurotiomycetes	Onygenales	AB075362	0	97.03
G2660	SSU	G2660__RIB_243	Basidiomycota	Agaricomycetes	Agaricales	KF291167	3e-118	98.75
G2660	SSU	G2660__RIB_2566	Ascomycota	Eurotiomycetes	Onygenales	U29389	6e-97	99.49
G2660	SSU	G2660__RIB_2917	Basidiomycota	Agaricomycetes	Agaricales	KF291119	0	99.55
G2660	SSU	G2660__RIB_2938	Basidiomycota	Agaricomycetes		EF024735	2e-124	99.59
G2660	SSU	G2660__RIB_2941	Basidiomycota	Agaricomycetes		AY382458	0	95.35
G2660	SSU	G2660__RIB_3076	Glomeromycota	Glomeromycetes	Glomerales	AB556916	1e-100	96.43
G2660	SSU	G2660__RIB_3159	Basidiomycota	Agaricomycetes	Hymenochaetales	AY771599	9e-119	97.6
G2660	SSU	G2660__RIB_317	Basidiomycota	Agaricomycetes		KC672636	2e-129	100
G2660	SSU	G2660__RIB_3217	Basidiomycota	Agaricomycetes	Agaricales	AY657016	2e-124	98.8
G2660	SSU	G2660__RIB_3233	Basidiomycota	Fungi other	Trechisporales	AY803753	1e-67	99.31
G2660	SSU	G2660__RIB_3371	Ascomycota	Sordariomycetes	Sordariales	DQ471032	9e-109	98.65
G2660	SSU	G2660__RIB_3416	Ascomycota	Dothideomycetes	Pleosporales	AY518668	1e-92	98.95
G2660	SSU	G2660__RIB_345	Basidiomycota	Agaricomycetes		KC671360	1e-127	99.6
G2660	SSU	G2660__RIB_3560	Ascomycota	Archaeorhizomycetes		KF993708	2e-109	95.92
G2660	SSU	G2660__RIB_3588	Ascomycota	Fungi other	Eurotiales	GU573850	6e-66	99.29
G2660	SSU	G2660__RIB_3753	Basidiomycota	Agaricomycetes		KC671360	1e-178	99.71
G2660	SSU	G2660__RIB_40	Ascomycota	Pezizomycetes	Pezizales	FJ790652	5e-126	99.2
G2660	SSU	G2660__RIB_4056	Basidiomycota	Agaricomycetes	Agaricales	KF291125	5e-126	99.2
G2660	SSU	G2660__RIB_4139	Ascomycota	Eurotiomycetes	Chaetothyriales	X91898	1e-96	97.58
G2660	SSU	G2660__RIB_4275	Ascomycota	Pezizomycetes	Pezizales	AY544712	0	99.76
G2660	SSU	G2660__RIB_4303	Basidiomycota	Fungi other		AY382467	0	93.97
G2660	SSU	G2660__RIB_4385	Glomeromycota	Glomeromycetes	Glomerales	KC708357	0	99.37
G2660	SSU	G2660__RIB_4408	Ascomycota	Pezizomycetes	Pezizales	U42666	0	99.79
G2660	SSU	G2660__RIB_446	Basidiomycota	Agaricomycetes	Agaricales	KF291132	4e-127	99.6
G2660	SSU	G2660__RIB_4577	Ascomycota	Fungi other		ABKH01000792	1e-98	90.68
G2660	SSU	G2660__RIB_4579	Basidiomycota	Tremellomycetes	Tremellales	DQ520095	1e-127	99.6
G2660	SSU	G2660__RIB_4735	Mortierellomycota	Mortierellomycetes	Mortierellales	EF023142	0	96.68
G2660	SSU	G2660__RIB_4762	Basidiomycota	Tremellomycetes	Tremellales	DQ520095	1e-127	99.6
G2660	SSU	G2660__RIB_4825	Ascomycota	Dothideomycetes	Dothideales	AY016348	2e-82	97.77
G2660	SSU	G2660__RIB_4858	Glomeromycota	Glomeromycetes	Glomerales	EF023845	1e-133	97.83
G2660	SSU	G2660__RIB_4979	Ascomycota	Fungi other		EU940046	7e-50	99.1
G2660	SSU	G2660__RIB_5107	Ascomycota	Eurotiomycetes	Onygenales	FJ358353	7e-121	98.01
G2660	SSU	G2660__RIB_5146	Ascomycota	Eurotiomycetes	Eurotiales	AAHF01000017	0	97.08
G2660	SSU	G2660__RIB_5166	Ascomycota	Eurotiomycetes	Chaetothyriales	FJ358326	0	99.44
G2660	SSU	G2660__RIB_5236	Ascomycota	Pezizomycetes	Pezizales	FJ848471	4e-148	99.31
G2660	SSU	G2660__RIB_5253	Ascomycota	Sordariomycetes	Sordariales	JQ067908	5e-126	99.6
G2660	SSU	G2660__RIB_5320	Basidiomycota	Wallemiomycetes	Geminibasidiales	JX242892	0	99.47
G2660	SSU	G2660__RIB_5454	Basidiomycota	Agaricomycetes		KC670791	3e-123	99.59
G2660	SSU	G2660__RIB_5505	Ascomycota	Eurotiomycetes	Eurotiales	EU136028	7e-120	99.58
G2660	SSU	G2660__RIB_5568	Ascomycota	Sordariomycetes	Hypocreales	AB237663	1e-138	97.26
G2660	SSU	G2660__RIB_5641	Basidiomycota	Wallemiomycetes	Geminibasidiales	JX242894	0	99.1
G2660	SSU	G2660__RIB_5665	Ascomycota	Dothideomycetes	Pleosporales	U04202	7e-120	99.17
G2660	SSU	G2660__RIB_5686	Ascomycota	Pezizomycetes		JN938743	1e-122	98.41
G2660	SSU	G2660__RIB_5715	Rozellomycota	Rozellomycetes		GU568155	4e-127	99.6
G2660	SSU	G2660__RIB_5726	Basidiomycota	Tremellomycetes	Tremellales	AY766081	7e-171	99.7
G2660	SSU	G2660__RIB_5991	Basidiomycota	Agaricomycetes		KJ137268	1e-117	97.21
G2660	SSU	G2660__RIB_6136	Basidiomycota	Agaricomycetes		EF023646	0	99.45
G2660	SSU	G2660__RIB_6155	Chytridiomycota	Chytridiomycetes		GU568170	8e-150	99.66
G2660	SSU	G2660__RIB_6419	Ascomycota	Dothideomycetes	Capnodiales	AY016349	1e-178	95.9
G2660	SSU	G2660__RIB_6592	Basidiomycota	Agaricomycetes		EF023646	0	96.53
G2660	SSU	G2660__RIB_6594	Ascomycota	Lecanoromycetes	Lecanorales	AF221063	4e-107	99.53
G2660	SSU	G2660__RIB_6658	Basidiomycota	Agaricomycetes		EF023646	0	99.73
G2660	SSU	G2660__RIB_6758	Basidiomycota	Agaricomycetes	Agaricales	KF291205	2e-124	98.8
G2660	SSU	G2660__RIB_6776	Basidiomycota	Agaricomycetes		EF024011	0	99.02
G2660	SSU	G2660__RIB_6785	Basidiomycota	Agaricomycetes	Agaricales	DQ435814	9e-166	97.94
G2660	SSU	G2660__RIB_6812	Basidiomycota	Agaricomycetes	Russulales	AY707093	0	98.43
G2660	SSU	G2660__RIB_6814	Mortierellomycota	Mortierellomycetes	Mortierellales	EF023142	3e-78	98.8
G2660	SSU	G2660__RIB_74	Ascomycota	Eurotiomycetes	Eurotiales	GU823984	0	99.51
G2660	SSU	G2660__RIB_7433	Basidiomycota	Agaricomycetes	Agaricales	DQ089019	0	99.71
G2660	SSU	G2660__RIB_7434	Basidiomycota	Agaricomycetes	Agaricales	KF291119	0	99.3
G2660	SSU	G2660__RIB_7626	Basidiomycota	Tremellomycetes	Tremellales	AY766081	0	99.08
G2660	SSU	G2660__RIB_7645	Ascomycota	Dothideomycetes	Pleosporales	U42483	1e-127	99.6
G2660	SSU	G2660__RIB_7736	Basidiomycota	Tremellomycetes	Tremellales	AY766081	3e-130	98.49
G2660	SSU	G2660__RIB_7754	Ascomycota	Eurotiomycetes	Eurotiales	AF245266	0	99.73
G2660	SSU	G2660__RIB_7784	Basidiomycota	Agaricomycetes	Agaricales	DQ092911	0	96.95
G2660	SSU	G2660__RIB_7914	Basidiomycota	Fungi other	Agaricales	U62538	3e-59	99.22
G2660	SSU	G2660__RIB_8020	Ascomycota	Fungi other		DQ248313	4e-54	99.17
G2660	SSU	G2660__RIB_8115	Ascomycota	Sordariomycetes	Hypocreales	KC670876	4e-163	99.68
G2660	SSU	G2660__RIB_8132	Basidiomycota	Tremellomycetes	Tremellales	DQ457627	4e-127	99.6
G2660	SSU	G2660__RIB_8214	Glomeromycota	Glomeromycetes	Glomerales	EU417640	5e-121	98.01
G2660	SSU	G2660__RIB_8219	Basidiomycota	Fungi other		AAAA02041554	4e-52	99.13
G2660	SSU	G2660__RIB_8247	Ascomycota	Dothideomycetes	Pleosporales	AY864822	1e-105	99.53
G2660	SSU	G2660__RIB_848	Ascomycota	Geoglossomycetes	Geoglossales	KC672479	1e-178	96.82
G2660	SSU	G2660__RIB_8552	Ascomycota	Geoglossomycetes	Geoglossales	AY544694	5e-126	99.2
G2660	SSU	G2660__RIB_8642	Basidiomycota	Agaricomycetes	Agaricales	KF291119	0	99.72
G2660	SSU	G2660__RIB_8659	Basidiomycota	Tremellomycetes	Tremellales	GU568124	0	99.27
G2660	SSU	G2660__RIB_8707	Ascomycota	Dothideomycetes		GU250315	1e-74	98.74
G2660	SSU	G2660__RIB_8906	Ascomycota	Pezizomycetes	Pezizales	U42666	1e-126	99.6
G2660	SSU	G2660__RIB_8934	Basidiomycota	Tremellomycetes	Tremellales	DQ520095	1e-127	99.6
G2660	SSU	G2660__RIB_8994	Basidiomycota	Fungi other		GU568161	2e-51	96.03
G2660	SSU	G2660__RIB_9013	Ascomycota	Pezizomycetes	Pezizales	DQ646533	1e-121	99.58
G2660	SSU	G2660__RIB_9055	Ascomycota	Lecanoromycetes	Lecanorales	JQ301651	1e-127	99.6
G2660	SSU	G2660__RIB_9172	Ascomycota	Dothideomycetes		DQ912313	1e-82	99.41
G2660	SSU	G2660__RIB_9244	Ascomycota	Fungi other	Onygenales	AF238302	2e-68	99.31
G2660	SSU	G2660__RIB_9387	Basidiomycota	Agaricomycetes	Hymenochaetales	AY771611	5e-126	99.21
G2660	SSU	G2660__RIB_9506	Ascomycota	Pezizomycetes	Pezizales	DQ787825	5e-126	99.6
G2660	SSU	G2660__RIB_9541	Ascomycota	Eurotiomycetes	Eurotiales	JX396260	4e-127	99.6
G2660	SSU	G2660__RIB_956	Ascomycota	Eurotiomycetes		KC337077	9e-129	100
G2660	SSU	G2660__RIB_9624	Basidiomycota	Agaricomycetes	Agaricales	KF291167	3e-146	99.65
G2660	SSU	G2660__RIB_9701	Basidiomycota	Agaricomycetes		EF023646	0	99.48
G2660	SSU	G2660__RIB_9775	Basidiomycota	Agaricomycetes	Agaricales	DQ444858	0	99.29
G2660	SSU	G2660__RIB_986	Chytridiomycota	Chytridiomycetes		GU568148	5e-116	96.81
G2660	SSU	G2660__RIB_9989	Ascomycota	Dothideomycetes	Capnodiales	KC674702	3e-89	99.45
G2661	SSU	G2661__RIB_1341	Ascomycota	Sordariomycetes	Hypocreales	ABDF02000071	1e-127	99.6
G2661	SSU	G2661__RIB_1459	Basidiomycota	Agaricomycetes		EF023646	1e-127	99.6
G2661	SSU	G2661__RIB_1902	Basidiomycota	Exobasidiomycetes	Exobasidiales	DQ667152	1e-117	97.21
G2661	SSU	G2661__RIB_1944	Ascomycota	Eurotiomycetes	Eurotiales	GU825367	1e-127	99.6
G2661	SSU	G2661__RIB_2906	Ascomycota	Eurotiomycetes		KC337077	2e-129	100
G2661	SSU	G2661__RIB_3067	Ascomycota	Sordariomycetes	Hypocreales	KC987194	1e-127	99.6
G2661	SSU	G2661__RIB_3173	Ascomycota	Sordariomycetes	Xylariales	JN166015	2e-165	99.08
G2661	SSU	G2661__RIB_3446	Ascomycota	Archaeorhizomycetes		JF836023	4e-117	97.21
G2661	SSU	G2661__RIB_3478	Chytridiomycota	Chytridiomycetes	Rhizophydiales	HM487044	0	96.06
G2661	SSU	G2661__RIB_4016	Ascomycota	Eurotiomycetes	Eurotiales	GU733361	4e-122	98.79
G2661	SSU	G2661__RIB_4350	Ascomycota	Sordariomycetes	Diaporthales	DQ173150	1e-122	98.41
G2661	SSU	G2661__RIB_473	Basidiomycota	Agaricomycetes	Agaricales	HM562266	3e-174	99.7
G2661	SSU	G2661__RIB_4763	Basidiomycota	Agaricomycetes	Agaricales	AEOK01000250	2e-105	99.07
G2661	SSU	G2661__RIB_4800	Ascomycota	Fungi other	Archaeorhizomycetales	EU179935	4e-57	99.19
G2661	SSU	G2661__RIB_5233	Ascomycota	Sordariomycetes	Hypocreales	EF638698	5e-126	99.2
G2661	SSU	G2661__RIB_534	Ascomycota	Sordariomycetes	Hypocreales	EF397557	7e-157	97.28
G2661	SSU	G2661__RIB_54	Chytridiomycota	Chytridiomycetes	Chytridiales	EU162638	2e-81	92.31
G2661	SSU	G2661__RIB_5429	Ascomycota	Sordariomycetes	Hypocreales	AAXH01001063	0	99.56
G2661	SSU	G2661__RIB_5451	Ascomycota	Eurotiomycetes	Eurotiales	GU573850	6e-71	99.33
G2661	SSU	G2661__RIB_603	Ascomycota	Sordariomycetes	Hypocreales	JX967533	0	100
G2661	SSU	G2661__RIB_6104	Ascomycota	Sordariomycetes	Sordariales	KC790427	1e-127	99.6
G2661	SSU	G2661__RIB_6803	Basidiomycota	Agaricomycetes	Agaricales	DQ457644	0	99.73
G2661	SSU	G2661__RIB_7075	Ascomycota	Sordariomycetes	Sordariales	CABT02000149	0	98.64
G2661	SSU	G2661__RIB_761	Ascomycota	Sordariomycetes	Sordariales	KC672698	0	98.73
G2661	SSU	G2661__RIB_7724	Ascomycota	Eurotiomycetes		KC337077	2e-129	100
G2661	SSU	G2661__RIB_7794	Basidiomycota	Agaricomycetes		KC672636	1e-127	99.6
G2661	SSU	G2661__RIB_7912	Ascomycota	Dothideomycetes	Pleosporales	AB534319	0	99.58
G2661	SSU	G2661__RIB_7933	Basidiomycota	Agaricomycetes		KC670909	5e-126	99.2
G2661	SSU	G2661__RIB_8356	Ascomycota	Sordariomycetes	Hypocreales	KC670704	6e-76	99.37
G2661	SSU	G2661__RIB_8427	Basidiomycota	Agaricomycetes		U09535	1e-89	96.5
G2661	SSU	G2661__RIB_8943	Basidiomycota	Agaricomycetes		DQ457622	9e-114	97.13
G2661	SSU	G2661__RIB_946	Basidiomycota	Tremellomycetes	Tremellales	EF053557	6e-177	95.43
G2661	SSU	G2661__RIB_947	Ascomycota	Fungi other	Sordariales	AJ496243	2e-65	99.28
G2661	SSU	G2661__RIB_9567	Ascomycota	Fungi other		JF836020	7e-55	93.29
G2661	SSU	G2661__RIB_9667	Ascomycota	Sordariomycetes	Hypocreales	HQ232214	5e-126	99.6
G2664	SSU	G2664__RIB_10066	Ascomycota	Eurotiomycetes	Eurotiales	KC842215	0	99.74
G2664	SSU	G2664__RIB_10087	Ascomycota	Eurotiomycetes	Eurotiales	AAKD03000144	2e-110	99.55
G2664	SSU	G2664__RIB_10133	Ascomycota	Sordariomycetes	Hypocreales	ABDF02000071	5e-126	99.2
G2664	SSU	G2664__RIB_1014	Ascomycota	Eurotiomycetes	Eurotiales	AAKD03000144	7e-112	99.12
G2664	SSU	G2664__RIB_10162	Ascomycota	Fungi other		HM590654	3e-88	94.37
G2664	SSU	G2664__RIB_10188	Ascomycota	Eurotiomycetes		KC337077	2e-129	100
G2664	SSU	G2664__RIB_10191	Ascomycota	Eurotiomycetes	Eurotiales	JN397370	2e-124	98.8
G2664	SSU	G2664__RIB_10237	Ascomycota	Eurotiomycetes	Eurotiales	JN397370	1e-127	99.6
G2664	SSU	G2664__RIB_10294	Ascomycota	Eurotiomycetes	Eurotiales	GU825367	1e-127	99.6
G2664	SSU	G2664__RIB_10295	Ascomycota	Fungi other	Eurotiales	GU573850	4e-57	99.19
G2664	SSU	G2664__RIB_10306	Ascomycota	Eurotiomycetes	Eurotiales	AAJN01000138	2e-91	99.46
G2664	SSU	G2664__RIB_10323	Basidiomycota	Agaricomycetes	Agaricales	AF076381	1e-79	99.39
G2664	SSU	G2664__RIB_10345	Basidiomycota	Fungi other		AY293156	0	94.76
G2664	SSU	G2664__RIB_10351	Ascomycota	Eurotiomycetes	Eurotiales	AB008413	9e-175	99.7
G2664	SSU	G2664__RIB_10365	Ascomycota	Eurotiomycetes	Eurotiales	JN397370	0	99.74
G2664	SSU	G2664__RIB_10366	Ascomycota	Eurotiomycetes	Eurotiales	KC670776	2e-135	99.62
G2664	SSU	G2664__RIB_10426	Basidiomycota	Agaricomycetes	Russulales	DQ457626	5e-86	99.43
G2664	SSU	G2664__RIB_10427	Ascomycota	Eurotiomycetes	Eurotiales	JN397370	1e-127	99.6
G2664	SSU	G2664__RIB_10429	Basidiomycota	Fungi other	Gomphales	AF026637	7e-65	96.69
G2664	SSU	G2664__RIB_10441	Basidiomycota	Agaricomycetes		KC672636	3e-89	99.45
G2664	SSU	G2664__RIB_10443	Ascomycota	Eurotiomycetes	Eurotiales	KC842215	0	99.74
G2664	SSU	G2664__RIB_10466	Basidiomycota	Fungi other	Russulales	U59060	6e-61	98.51
G2664	SSU	G2664__RIB_10487	Ascomycota	Eurotiomycetes	Eurotiales	AB245443	0	99.77
G2664	SSU	G2664__RIB_10520	Ascomycota	Eurotiomycetes	Eurotiales	AB003808	0	99.73
G2664	SSU	G2664__RIB_10543	Basidiomycota	Agaricomycetes		DQ511032	1e-127	99.6
G2664	SSU	G2664__RIB_10559	Ascomycota	Eurotiomycetes	Eurotiales	JN397370	1e-127	99.6
G2664	SSU	G2664__RIB_10594	Basidiomycota	Agaricomycetes	Russulales	U59093	0	99.06
G2664	SSU	G2664__RIB_106	Ascomycota	Fungi other	Hypocreales	AB490176	1e-50	99.12
G2664	SSU	G2664__RIB_1060	Mucoromycota	Mucoromycetes	Endogonales	KC708419	1e-178	95.66
G2664	SSU	G2664__RIB_10698	Ascomycota	Eurotiomycetes	Eurotiales	AP007172	4e-92	99.47
G2664	SSU	G2664__RIB_10703	Ascomycota	Eurotiomycetes	Eurotiales	KF152942	2e-124	98.8
G2664	SSU	G2664__RIB_10744	Ascomycota	Eurotiomycetes	Eurotiales	JN397370	5e-116	96.81
G2664	SSU	G2664__RIB_10758	Basidiomycota	Agaricomycetes	Russulales	AY707093	4e-92	99.47
G2664	SSU	G2664__RIB_10777	Ascomycota	Eurotiomycetes	Eurotiales	JN397370	5e-126	99.2
G2664	SSU	G2664__RIB_10799	Basidiomycota	Agaricomycetes	Russulales	AY293156	9e-175	99.7
G2664	SSU	G2664__RIB_10814	Ascomycota	Eurotiomycetes	Eurotiales	AAKD03000144	3e-100	99.02
G2664	SSU	G2664__RIB_10828	Ascomycota	Eurotiomycetes	Eurotiales	GU823984	1e-106	99.53
G2664	SSU	G2664__RIB_1087	Ascomycota	Eurotiomycetes	Eurotiales	JN397370	2e-129	100
G2664	SSU	G2664__RIB_10882	Ascomycota	Eurotiomycetes	Eurotiales	KF758784	2e-114	96.41
G2664	SSU	G2664__RIB_10892	Ascomycota	Leotiomycetes	Helotiales	AY903749	0	98.62
G2664	SSU	G2664__RIB_10927	Ascomycota	Eurotiomycetes	Eurotiales	JN397370	4e-127	99.6
G2664	SSU	G2664__RIB_10931	Ascomycota	Leotiomycetes		AB015776	1e-138	99.27
G2664	SSU	G2664__RIB_1094	Ascomycota	Eurotiomycetes	Eurotiales	GU823984	2e-86	99.44
G2664	SSU	G2664__RIB_10955	Ascomycota	Fungi other	Chaetothyriales	KC672693	6e-56	100
G2664	SSU	G2664__RIB_10956	Ascomycota	Eurotiomycetes	Eurotiales	JN397370	2e-129	100
G2664	SSU	G2664__RIB_11008	Ascomycota	Eurotiomycetes	Eurotiales	JN397370	1e-127	99.6
G2664	SSU	G2664__RIB_1101	Ascomycota	Eurotiomycetes	Eurotiales	EU136028	5e-153	99.66
G2664	SSU	G2664__RIB_11062	Basidiomycota	Agaricomycetes	Russulales	AY293156	4e-147	99.65
G2664	SSU	G2664__RIB_1108	Ascomycota	Eurotiomycetes		KC337077	9e-84	100
G2664	SSU	G2664__RIB_11137	Ascomycota	Eurotiomycetes		KC337077	0	99.76
G2664	SSU	G2664__RIB_11183	Ascomycota	Eurotiomycetes	Eurotiales	AORT01023440	1e-122	98.41
G2664	SSU	G2664__RIB_11191	Basidiomycota	Agaricomycetes	Polyporales	AF334914	1e-97	95.96
G2664	SSU	G2664__RIB_11221	Basidiomycota	Agaricomycetes	Gomphales	AY707095	0	99.72
G2664	SSU	G2664__RIB_1123	Ascomycota	Eurotiomycetes	Eurotiales	JN397370	2e-105	100
G2664	SSU	G2664__RIB_11244	Ascomycota	Sordariomycetes	Xylariales	EU089663	0	99.16
G2664	SSU	G2664__RIB_11378	Ascomycota	Eurotiomycetes	Eurotiales	KF758801	1e-127	99.6
G2664	SSU	G2664__RIB_11406	Ascomycota	Eurotiomycetes	Eurotiales	KF152942	5e-167	99.09
G2664	SSU	G2664__RIB_11410	Ascomycota	Eurotiomycetes	Eurotiales	AGII01000282	7e-115	99.56
G2664	SSU	G2664__RIB_11439	Ascomycota	Eurotiomycetes	Eurotiales	FJ947527	1e-126	99.6
G2664	SSU	G2664__RIB_11442	Ascomycota	Eurotiomycetes	Eurotiales	GU824070	0	100
G2664	SSU	G2664__RIB_11446	Basidiomycota	Agaricomycetes	Russulales	DQ457626	8e-146	98.63
G2664	SSU	G2664__RIB_11459	Ascomycota	Eurotiomycetes	Eurotiales	JX396260	1e-127	99.6
G2664	SSU	G2664__RIB_11531	Ascomycota	Eurotiomycetes	Eurotiales	M83260	5e-172	99.7
G2664	SSU	G2664__RIB_11536	Basidiomycota	Agaricomycetes	Agaricales	L36659	5e-112	98.69
G2664	SSU	G2664__RIB_1154	Ascomycota	Eurotiomycetes	Eurotiales	JN397370	2e-119	97.61
G2664	SSU	G2664__RIB_11543	Ascomycota	Eurotiomycetes	Eurotiales	JN397370	1e-127	99.6
G2664	SSU	G2664__RIB_11557	Ascomycota	Eurotiomycetes	Eurotiales	KF758801	2e-129	100
G2664	SSU	G2664__RIB_11572	Ascomycota	Eurotiomycetes	Eurotiales	M83260	3e-174	99.7
G2664	SSU	G2664__RIB_11592	Basidiomycota	Agaricomycetes	Russulales	U59093	9e-89	99.45
G2664	SSU	G2664__RIB_11610	Basidiomycota	Fungi other	Russulales	AEOJ01000011	1e-57	97.01
G2664	SSU	G2664__RIB_11636	Ascomycota	Eurotiomycetes	Eurotiales	KF152942	5e-106	99.53
G2664	SSU	G2664__RIB_11690	Basidiomycota	Agaricomycetes	Russulales	AY293156	3e-78	98.79
G2664	SSU	G2664__RIB_11706	Ascomycota	Eurotiomycetes		KC337077	2e-95	100
G2664	SSU	G2664__RIB_11716	Ascomycota	Eurotiomycetes	Eurotiales	GU823984	3e-164	100
G2664	SSU	G2664__RIB_11734	Ascomycota	Eurotiomycetes	Eurotiales	KF152942	0	99.78
G2664	SSU	G2664__RIB_11735	Ascomycota	Eurotiomycetes		KC337077	1e-126	100
G2664	SSU	G2664__RIB_11770	Ascomycota	Orbiliomycetes	Orbiliales	AJ001990	5e-172	98.54
G2664	SSU	G2664__RIB_11775	Ascomycota	Eurotiomycetes	Eurotiales	AB003946	9e-119	99.57
G2664	SSU	G2664__RIB_11796	Ascomycota	Eurotiomycetes	Eurotiales	AY256241	1e-127	99.6
G2664	SSU	G2664__RIB_11844	Ascomycota	Eurotiomycetes	Eurotiales	HQ263114	0	99.78
G2664	SSU	G2664__RIB_11847	Ascomycota	Eurotiomycetes	Eurotiales	GU825333	2e-129	100
G2664	SSU	G2664__RIB_11869	Ascomycota	Xylonomycetes		DQ248314	2e-88	99.45
G2664	SSU	G2664__RIB_1191	Ascomycota	Eurotiomycetes	Eurotiales	KC962231	0	99.71
G2664	SSU	G2664__RIB_11929	Ascomycota	Eurotiomycetes	Eurotiales	JN397370	1e-127	99.6
G2664	SSU	G2664__RIB_11940	Ascomycota	Eurotiomycetes	Eurotiales	JX396260	4e-127	99.6
G2664	SSU	G2664__RIB_11946	Basidiomycota	Agaricomycetes	Russulales	DQ911615	8e-135	98.88
G2664	SSU	G2664__RIB_1199	Ascomycota	Eurotiomycetes	Chaetothyriales	JN856010	3e-144	99.64
G2664	SSU	G2664__RIB_11992	Ascomycota	Eurotiomycetes		KC337077	2e-125	99.2
G2664	SSU	G2664__RIB_11997	Ascomycota	Eurotiomycetes		KC337077	2e-129	100
G2664	SSU	G2664__RIB_12	Ascomycota	Eurotiomycetes	Eurotiales	JN397370	2e-129	100
G2664	SSU	G2664__RIB_12000	Ascomycota	Eurotiomycetes	Eurotiales	GU733351	1e-127	99.6
G2664	SSU	G2664__RIB_12008	Ascomycota	Eurotiomycetes	Chaetothyriales	KF155204	5e-126	99.21
G2664	SSU	G2664__RIB_12011	Ascomycota	Eurotiomycetes	Eurotiales	AGII01000282	2e-85	98.34
G2664	SSU	G2664__RIB_1202	Ascomycota	Eurotiomycetes		KC337077	2e-129	100
G2664	SSU	G2664__RIB_12027	Basidiomycota	Agaricomycetes		AY916719	0	99.77
G2664	SSU	G2664__RIB_12030	Ascomycota	Eurotiomycetes		KC337077	1e-122	98.41
G2664	SSU	G2664__RIB_12065	Ascomycota	Eurotiomycetes	Eurotiales	KF849480	1e-127	99.6
G2664	SSU	G2664__RIB_12067	Basidiomycota	Agaricomycetes	Russulales	AF334918	2e-91	98.44
G2664	SSU	G2664__RIB_12107	Ascomycota	Eurotiomycetes		KC337077	9e-180	100
G2664	SSU	G2664__RIB_12110	Ascomycota	Eurotiomycetes	Eurotiales	FJ379537	0	96.95
G2664	SSU	G2664__RIB_12115	Ascomycota	Eurotiomycetes	Eurotiales	KF758801	0	99.79
G2664	SSU	G2664__RIB_12116	Ascomycota	Eurotiomycetes	Eurotiales	GU825367	2e-129	100
G2664	SSU	G2664__RIB_12120	Ascomycota	Eurotiomycetes	Eurotiales	KF152942	3e-93	99.47
G2664	SSU	G2664__RIB_12137	Ascomycota	Eurotiomycetes	Eurotiales	KF152942	1e-127	99.6
G2664	SSU	G2664__RIB_12175	Ascomycota	Fungi other	Eurotiales	AAKD03000144	8e-51	99.12
G2664	SSU	G2664__RIB_12183	Ascomycota	Eurotiomycetes	Eurotiales	EU136028	3e-113	99.56
G2664	SSU	G2664__RIB_12204	Ascomycota	Eurotiomycetes	Eurotiales	EU136028	1e-128	99.6
G2664	SSU	G2664__RIB_1221	Basidiomycota	Agaricomycetes	Polyporales	FJ379281	2e-105	99.53
G2664	SSU	G2664__RIB_12213	Basidiomycota	Agaricomycetes	Hymenochaetales	U59064	0	96.03
G2664	SSU	G2664__RIB_12215	Ascomycota	Eurotiomycetes		KC337077	6e-161	100
G2664	SSU	G2664__RIB_12219	Ascomycota	Fungi other	Eurotiales	X78537	3e-63	98.56
G2664	SSU	G2664__RIB_12235	Basidiomycota	Agaricomycetes	Russulales	AY707093	0	99.2
G2664	SSU	G2664__RIB_12279	Ascomycota	Eurotiomycetes	Eurotiales	JN397370	1e-127	99.6
G2664	SSU	G2664__RIB_12294	Ascomycota	Eurotiomycetes	Eurotiales	KF152942	4e-127	99.6
G2664	SSU	G2664__RIB_1230	Ascomycota	Eurotiomycetes	Eurotiales	KF776917	0	99.76
G2664	SSU	G2664__RIB_12322	Ascomycota	Eurotiomycetes	Eurotiales	GU568129	0	99.75
G2664	SSU	G2664__RIB_12330	Ascomycota	Eurotiomycetes		KC337077	1e-127	99.6
G2664	SSU	G2664__RIB_1235	Basidiomycota	Agaricomycetes	Agaricales	KF291252	2e-80	98.82
G2664	SSU	G2664__RIB_12354	Ascomycota	Sordariomycetes	Hypocreales	AB112030	7e-130	99.22
G2664	SSU	G2664__RIB_12397	Ascomycota	Fungi other	Hypocreales	ABDF02000071	1e-53	100
G2664	SSU	G2664__RIB_12410	Ascomycota	Eurotiomycetes	Eurotiales	JX396260	1e-127	99.6
G2664	SSU	G2664__RIB_12428	Ascomycota	Eurotiomycetes	Eurotiales	FJ430768	0	99.59
G2664	SSU	G2664__RIB_1243	Ascomycota	Eurotiomycetes	Eurotiales	FJ545752	1e-127	99.6
G2664	SSU	G2664__RIB_12435	Ascomycota	Eurotiomycetes	Eurotiales	FR774046	0	99.76
G2664	SSU	G2664__RIB_12442	Ascomycota	Lecanoromycetes		JQ004726	0	98.18
G2664	SSU	G2664__RIB_12452	Ascomycota	Eurotiomycetes	Eurotiales	JN886804	1e-127	99.6
G2664	SSU	G2664__RIB_12462	Basidiomycota	Agaricomycetes	Hymenochaetales	AY771611	7e-105	95.42
G2664	SSU	G2664__RIB_12481	Ascomycota	Eurotiomycetes	Eurotiales	AAKD03000144	2e-110	99.55
G2664	SSU	G2664__RIB_12498	Ascomycota	Sordariomycetes	Microascales	JN941647	4e-97	96.31
G2664	SSU	G2664__RIB_1250	Ascomycota	Eurotiomycetes	Eurotiales	KF776917	0	99.76
G2664	SSU	G2664__RIB_1252	Ascomycota	Eurotiomycetes		KC337077	2e-129	100
G2664	SSU	G2664__RIB_12585	Mucoromycota	Mucoromycetes	Mucorales	HM161751	0	96.77
G2664	SSU	G2664__RIB_12595	Basidiomycota	Agaricomycetes	Polyporales	U59089	5e-121	99.58
G2664	SSU	G2664__RIB_12627	Basidiomycota	Agaricomycetes	Russulales	AY293156	2e-124	98.8
G2664	SSU	G2664__RIB_12634	Ascomycota	Eurotiomycetes	Eurotiales	AB032070	0	99.51
G2664	SSU	G2664__RIB_12648	Ascomycota	Eurotiomycetes		KC337077	2e-129	100
G2664	SSU	G2664__RIB_12664	Basidiomycota	Fungi other		KC673286	2e-51	97.5
G2664	SSU	G2664__RIB_12673	Ascomycota	Eurotiomycetes		KC337077	0	100
G2664	SSU	G2664__RIB_12714	Ascomycota	Eurotiomycetes	Eurotiales	EU136028	4e-129	99.22
G2664	SSU	G2664__RIB_12717	Basidiomycota	Agaricomycetes	Russulales	U59093	9e-180	99.15
G2664	SSU	G2664__RIB_12741	Basidiomycota	Agaricomycetes	Russulales	AY293156	2e-76	98.77
G2664	SSU	G2664__RIB_12756	Basidiomycota	Fungi other	Agaricales	HM562280	1e-62	99.25
G2664	SSU	G2664__RIB_12775	Ascomycota	Eurotiomycetes	Eurotiales	GU568129	1e-127	99.6
G2664	SSU	G2664__RIB_12786	Ascomycota	Eurotiomycetes	Eurotiales	AB003946	3e-111	99.55
G2664	SSU	G2664__RIB_12789	Basidiomycota	Agaricomycetes	Russulales	AY293156	1e-127	99.6
G2664	SSU	G2664__RIB_1282	Basidiomycota	Agaricomycetes	Russulales	AY707093	0	98.15
G2664	SSU	G2664__RIB_12862	Basidiomycota	Agaricomycetes	Russulales	DQ911615	2e-90	99.46
G2664	SSU	G2664__RIB_12888	Ascomycota	Eurotiomycetes	Eurotiales	KF758801	6e-151	100
G2664	SSU	G2664__RIB_12903	Ascomycota	Sordariomycetes	Xylariales	FJ430577	0	99.56
G2664	SSU	G2664__RIB_12929	Ascomycota	Eurotiomycetes	Eurotiales	KF758801	0	99.75
G2664	SSU	G2664__RIB_12936	Basidiomycota	Agaricomycetes	Russulales	AY707093	0	98.95
G2664	SSU	G2664__RIB_12951	Ascomycota	Sordariomycetes	Hypocreales	GU823680	8e-150	99.66
G2664	SSU	G2664__RIB_12977	Ascomycota	Eurotiomycetes	Eurotiales	GU825367	4e-147	99.65
G2664	SSU	G2664__RIB_12981	Ascomycota	Eurotiomycetes		KC337077	4e-127	99.6
G2664	SSU	G2664__RIB_1300	Basidiomycota	Fungi other	Russulales	AY293156	6e-56	99.18
G2664	SSU	G2664__RIB_13018	Ascomycota	Eurotiomycetes	Eurotiales	KF849480	2e-129	100
G2664	SSU	G2664__RIB_13100	Basidiomycota	Agaricomycetes	Russulales	AF334918	0	97.65
G2664	SSU	G2664__RIB_13129	Ascomycota	Eurotiomycetes		KC337077	2e-125	99.2
G2664	SSU	G2664__RIB_13130	Ascomycota	Dothideomycetes		FJ161133	1e-127	99.6
G2664	SSU	G2664__RIB_13146	Ascomycota	Eurotiomycetes	Eurotiales	KF152942	0	99.74
G2664	SSU	G2664__RIB_1315	Ascomycota	Eurotiomycetes	Eurotiales	GU824070	5e-126	99.2
G2664	SSU	G2664__RIB_13205	Ascomycota	Eurotiomycetes	Eurotiales	ABAR01000155	2e-124	99.19
G2664	SSU	G2664__RIB_13221	Ascomycota	Fungi other		JN397370	1e-102	93.63
G2664	SSU	G2664__RIB_13270	Ascomycota	Sordariomycetes	Hypocreales	AY357275	2e-175	98.84
G2664	SSU	G2664__RIB_13279	Ascomycota	Eurotiomycetes	Eurotiales	GU823984	8e-150	100
G2664	SSU	G2664__RIB_13292	Ascomycota	Eurotiomycetes	Eurotiales	JN397370	4e-148	99.65
G2664	SSU	G2664__RIB_13295	Ascomycota	Eurotiomycetes	Eurotiales	M83260	0	99.77
G2664	SSU	G2664__RIB_13304	Ascomycota	Eurotiomycetes	Eurotiales	KF152942	0	99.74
G2664	SSU	G2664__RIB_13309	Ascomycota	Eurotiomycetes	Eurotiales	KF758801	3e-113	99.56
G2664	SSU	G2664__RIB_13333	Ascomycota	Eurotiomycetes	Eurotiales	GU823984	0	100
G2664	SSU	G2664__RIB_13334	Ascomycota	Eurotiomycetes		KC337077	9e-129	100
G2664	SSU	G2664__RIB_13372	Ascomycota	Fungi other	Eurotiales	KF152942	1e-58	97.76
G2664	SSU	G2664__RIB_1339	Ascomycota	Eurotiomycetes	Eurotiales	JN397370	0	99.79
G2664	SSU	G2664__RIB_13390	Ascomycota	Sordariomycetes	Xylariales	AF346558	0	99.15
G2664	SSU	G2664__RIB_13412	Ascomycota	Eurotiomycetes	Eurotiales	JX396260	1e-127	99.6
G2664	SSU	G2664__RIB_13416	Ascomycota	Eurotiomycetes	Eurotiales	EU136028	0	99.45
G2664	SSU	G2664__RIB_13465	Ascomycota	Eurotiomycetes		KC337077	2e-129	100
G2664	SSU	G2664__RIB_13466	Basidiomycota	Wallemiomycetes	Geminibasidiales	JX242894	5e-126	99.2
G2664	SSU	G2664__RIB_13479	Ascomycota	Eurotiomycetes	Eurotiales	JX396260	4e-127	99.6
G2664	SSU	G2664__RIB_13508	Ascomycota	Eurotiomycetes		DQ093693	5e-121	98.39
G2664	SSU	G2664__RIB_13516	Basidiomycota	Fungi other		AAAA02041554	1e-52	99.14
G2664	SSU	G2664__RIB_13526	Ascomycota	Eurotiomycetes	Eurotiales	GU823984	2e-129	100
G2664	SSU	G2664__RIB_13535	Ascomycota	Dothideomycetes	Dothideales	EU167562	2e-156	99.67
G2664	SSU	G2664__RIB_13586	Ascomycota	Eurotiomycetes	Eurotiales	JN397370	1e-127	99.6
G2664	SSU	G2664__RIB_13606	Basidiomycota	Wallemiomycetes	Geminibasidiales	JX242894	1e-127	99.6
G2664	SSU	G2664__RIB_13636	Ascomycota	Eurotiomycetes	Eurotiales	GU823984	5e-126	99.2
G2664	SSU	G2664__RIB_13650	Ascomycota	Eurotiomycetes	Eurotiales	AB003952	1e-127	99.6
G2664	SSU	G2664__RIB_13719	Ascomycota	Sordariomycetes	Hypocreales	GU823680	2e-180	99.71
G2664	SSU	G2664__RIB_13761	Basidiomycota	Agaricomycetes		AEWW01038292	9e-99	96.77
G2664	SSU	G2664__RIB_13769	Ascomycota	Eurotiomycetes	Eurotiales	GU823984	5e-126	99.2
G2664	SSU	G2664__RIB_13786	Basidiomycota	Agaricomycetes	Polyporales	AY293149	0	99.52
G2664	SSU	G2664__RIB_13802	Ascomycota	Eurotiomycetes	Eurotiales	JN397370	7e-130	100
G2664	SSU	G2664__RIB_13813	Ascomycota	Eurotiomycetes	Eurotiales	JN397370	4e-122	99.18
G2664	SSU	G2664__RIB_13825	Basidiomycota	Agaricomycetes	Russulales	U59093	4e-127	99.6
G2664	SSU	G2664__RIB_13834	Ascomycota	Eurotiomycetes		KC337077	0	99.76
G2664	SSU	G2664__RIB_13839	Ascomycota	Eurotiomycetes	Eurotiales	KF758801	3e-128	99.6
G2664	SSU	G2664__RIB_13861	Ascomycota	Eurotiomycetes	Eurotiales	KC670680	0	99.78
G2664	SSU	G2664__RIB_13882	Ascomycota	Sordariomycetes	Hypocreales	ABDF02000071	0	100
G2664	SSU	G2664__RIB_13893	Ascomycota	Eurotiomycetes	Eurotiales	KF849480	1e-126	99.6
G2664	SSU	G2664__RIB_13947	Ascomycota	Eurotiomycetes	Eurotiales	JX396260	1e-127	99.6
G2664	SSU	G2664__RIB_13967	Basidiomycota	Agaricomycetes	Russulales	AY293156	1e-122	98.41
G2664	SSU	G2664__RIB_13971	Basidiomycota	Agaricomycetes	Russulales	AY293156	0	98.71
G2664	SSU	G2664__RIB_14038	Ascomycota	Eurotiomycetes	Eurotiales	KF849480	0	99.44
G2664	SSU	G2664__RIB_14080	Ascomycota	Eurotiomycetes	Eurotiales	KF849480	1e-127	99.6
G2664	SSU	G2664__RIB_1409	Ascomycota	Eurotiomycetes	Eurotiales	GU823984	1e-127	99.6
G2664	SSU	G2664__RIB_14097	Ascomycota	Sordariomycetes	Hypocreales	ABDF02000071	0	100
G2664	SSU	G2664__RIB_14164	Ascomycota	Eurotiomycetes	Eurotiales	JN397370	2e-129	100
G2664	SSU	G2664__RIB_14165	Ascomycota	Eurotiomycetes	Eurotiales	AAKD03000144	5e-126	99.2
G2664	SSU	G2664__RIB_14192	Ascomycota	Eurotiomycetes	Eurotiales	KF758801	0	99.72
G2664	SSU	G2664__RIB_14263	Basidiomycota	Agaricomycetes	Russulales	AY293156	5e-126	99.2
G2664	SSU	G2664__RIB_14303	Ascomycota	Eurotiomycetes		KC337077	3e-98	100
G2664	SSU	G2664__RIB_14338	Ascomycota	Eurotiomycetes	Eurotiales	KF849480	1e-132	100
G2664	SSU	G2664__RIB_14348	Ascomycota	Eurotiomycetes	Eurotiales	JN397370	2e-129	100
G2664	SSU	G2664__RIB_14460	Ascomycota	Eurotiomycetes	Eurotiales	AAJN01000138	4e-102	99.51
G2664	SSU	G2664__RIB_14472	Ascomycota	Eurotiomycetes	Eurotiales	JN397370	2e-129	100
G2664	SSU	G2664__RIB_14474	Ascomycota	Eurotiomycetes	Eurotiales	JN397370	2e-129	100
G2664	SSU	G2664__RIB_14492	Ascomycota	Eurotiomycetes	Eurotiales	KF758801	0	99.79
G2664	SSU	G2664__RIB_14512	Ascomycota	Fungi other	Chaetothyriales	KF155192	3e-59	99.22
G2664	SSU	G2664__RIB_14516	Ascomycota	Eurotiomycetes	Eurotiales	KF758801	1e-127	99.6
G2664	SSU	G2664__RIB_14538	Ascomycota	Eurotiomycetes	Eurotiales	GU825367	2e-129	100
G2664	SSU	G2664__RIB_14558	Ascomycota	Sordariomycetes	Lulworthiales	AY879034	1e-127	99.6
G2664	SSU	G2664__RIB_14588	Ascomycota	Eurotiomycetes	Eurotiales	KF758801	1e-127	99.6
G2664	SSU	G2664__RIB_14592	Ascomycota	Eurotiomycetes	Eurotiales	AB003946	4e-87	99.44
G2664	SSU	G2664__RIB_14593	Ascomycota	Eurotiomycetes	Eurotiales	JN397370	4e-112	98.28
G2664	SSU	G2664__RIB_14603	Ascomycota	Eurotiomycetes	Eurotiales	JN397370	1e-127	99.6
G2664	SSU	G2664__RIB_14605	Ascomycota	Eurotiomycetes		KC337077	0	99.77
G2664	SSU	G2664__RIB_14609	Ascomycota	Fungi other	Eurotiales	AP007172	4e-67	99.3
G2664	SSU	G2664__RIB_14623	Ascomycota	Sordariomycetes	Hypocreales	ABDF02000071	2e-166	100
G2664	SSU	G2664__RIB_14639	Ascomycota	Eurotiomycetes	Eurotiales	GU733365	9e-139	99.63
G2664	SSU	G2664__RIB_14645	Ascomycota	Fungi other	Eurotiales	GU573850	4e-62	99.25
G2664	SSU	G2664__RIB_14690	Ascomycota	Eurotiomycetes	Eurotiales	GU824070	5e-126	99.2
G2664	SSU	G2664__RIB_14707	Basidiomycota	Agaricomycetes	Russulales	U59093	0	99.3
G2664	SSU	G2664__RIB_14734	Ascomycota	Eurotiomycetes	Eurotiales	KF758801	4e-122	98.4
G2664	SSU	G2664__RIB_14750	Ascomycota	Eurotiomycetes		KC337077	1e-117	97.23
G2664	SSU	G2664__RIB_14753	Basidiomycota	Agaricomycetes	Boletales	M94340	3e-98	99.49
G2664	SSU	G2664__RIB_14762	Ascomycota	Eurotiomycetes	Eurotiales	KF152942	0	99.79
G2664	SSU	G2664__RIB_14780	Ascomycota	Eurotiomycetes		KC337077	2e-76	100
G2664	SSU	G2664__RIB_14790	Basidiomycota	Agaricomycetes	Russulales	AY293156	0	99.5
G2664	SSU	G2664__RIB_14794	Basidiomycota	Agaricomycetes	Agaricales	AF076381	3e-76	99.37
G2664	SSU	G2664__RIB_14796	Ascomycota	Eurotiomycetes	Eurotiales	EF411061	0	99.36
G2664	SSU	G2664__RIB_14841	Ascomycota	Eurotiomycetes	Eurotiales	KF849480	8e-150	100
G2664	SSU	G2664__RIB_14885	Basidiomycota	Agaricomycetes		KC671252	2e-109	95.22
G2664	SSU	G2664__RIB_14896	Basidiomycota	Fungi other	Hymenochaetales	DQ873638	6e-51	99.12
G2664	SSU	G2664__RIB_1490	Ascomycota	Eurotiomycetes	Eurotiales	KF758801	5e-126	99.2
G2664	SSU	G2664__RIB_14916	Ascomycota	Eurotiomycetes	Eurotiales	AB003808	2e-119	97.61
G2664	SSU	G2664__RIB_14923	Ascomycota	Eurotiomycetes	Eurotiales	KF758801	5e-121	98.01
G2664	SSU	G2664__RIB_14940	Ascomycota	Fungi other	Eurotiales	EU889250	3e-68	99.31
G2664	SSU	G2664__RIB_14967	Basidiomycota	Agaricomycetes		DQ511033	2e-125	99.2
G2664	SSU	G2664__RIB_15015	Ascomycota	Eurotiomycetes	Eurotiales	JN397370	9e-129	100
G2664	SSU	G2664__RIB_15035	Ascomycota	Eurotiomycetes	Eurotiales	JN397370	1e-127	99.6
G2664	SSU	G2664__RIB_15038	Basidiomycota	Agaricomycetes		JN940333	2e-124	98.8
G2664	SSU	G2664__RIB_15050	Ascomycota	Eurotiomycetes		KC337077	8e-160	99.68
G2664	SSU	G2664__RIB_15072	Basidiomycota	Agaricomycetes	Russulales	AY707093	3e-83	99.42
G2664	SSU	G2664__RIB_15077	Ascomycota	Eurotiomycetes	Eurotiales	JX396260	1e-127	99.6
G2664	SSU	G2664__RIB_15110	Ascomycota	Eurotiomycetes	Chaetothyriales	KC672693	2e-86	100
G2664	SSU	G2664__RIB_15168	Ascomycota	Eurotiomycetes	Eurotiales	KF849480	1e-127	100
G2664	SSU	G2664__RIB_15184	Basidiomycota	Agaricomycetes	Russulales	AY293156	1e-127	99.6
G2664	SSU	G2664__RIB_15201	Mucoromycota	Mucoromycetes	Mucorales	X89435	4e-127	99.6
G2664	SSU	G2664__RIB_1522	Basidiomycota	Fungi other	Gomphales	AY707095	6e-66	99.29
G2664	SSU	G2664__RIB_15230	Ascomycota	Eurotiomycetes	Eurotiales	GU825367	2e-129	100
G2664	SSU	G2664__RIB_15257	Ascomycota	Eurotiomycetes	Eurotiales	GU568129	1e-127	99.6
G2664	SSU	G2664__RIB_15263	Ascomycota	Eurotiomycetes	Eurotiales	AAKD03000144	3e-88	99.44
G2664	SSU	G2664__RIB_15293	Basidiomycota	Agaricomycetes	Gomphales	AF026637	4e-118	99.57
G2664	SSU	G2664__RIB_15294	Ascomycota	Eurotiomycetes	Eurotiales	AAJN01000138	4e-104	99.52
G2664	SSU	G2664__RIB_15301	Ascomycota	Eurotiomycetes	Eurotiales	JN397370	4e-127	99.6
G2664	SSU	G2664__RIB_1535	Ascomycota	Eurotiomycetes	Eurotiales	GU823984	2e-114	100
G2664	SSU	G2664__RIB_15355	Ascomycota	Sordariomycetes	Hypocreales	EF211127	1e-99	96.41
G2664	SSU	G2664__RIB_15382	Ascomycota	Eurotiomycetes	Eurotiales	KF758801	1e-127	99.6
G2664	SSU	G2664__RIB_15384	Ascomycota	Eurotiomycetes	Eurotiales	AAKD03000144	7e-105	99.52
G2664	SSU	G2664__RIB_15396	Ascomycota	Eurotiomycetes		KC337077	1e-127	99.6
G2664	SSU	G2664__RIB_15405	Basidiomycota	Agaricomycetes	Agaricales	AF076381	2e-75	99.36
G2664	SSU	G2664__RIB_15409	Ascomycota	Pezizomycetes	Pezizales	DQ646546	0	98.77
G2664	SSU	G2664__RIB_15433	Basidiomycota	Agaricomycetes	Russulales	U59093	4e-147	99.65
G2664	SSU	G2664__RIB_15450	Ascomycota	Eurotiomycetes		KC337077	2e-110	100
G2664	SSU	G2664__RIB_15469	Ascomycota	Sordariomycetes	Hypocreales	GU823680	0	100
G2664	SSU	G2664__RIB_15479	Ascomycota	Eurotiomycetes	Eurotiales	JN397370	9e-129	100
G2664	SSU	G2664__RIB_1550	Chytridiomycota	Chytridiomycetes		AY987437	9e-119	97.61
G2664	SSU	G2664__RIB_15504	Ascomycota	Eurotiomycetes	Eurotiales	M60300	1e-127	99.6
G2664	SSU	G2664__RIB_15556	Ascomycota	Eurotiomycetes	Eurotiales	KF152942	6e-118	99.57
G2664	SSU	G2664__RIB_15561	Ascomycota	Eurotiomycetes	Eurotiales	GQ458035	0	99.77
G2664	SSU	G2664__RIB_15634	Basidiomycota	Agaricomycetes		EF023592	3e-79	98.24
G2664	SSU	G2664__RIB_15647	Ascomycota	Eurotiomycetes		KC337077	2e-129	100
G2664	SSU	G2664__RIB_15656	Basidiomycota	Agaricomycetes	Agaricales	KF291211	7e-80	99.39
G2664	SSU	G2664__RIB_15668	Basidiomycota	Fungi other	Polyporales	FJ171729	7e-60	99.22
G2664	SSU	G2664__RIB_15723	Ascomycota	Eurotiomycetes		KC337077	4e-127	99.6
G2664	SSU	G2664__RIB_15730	Ascomycota	Eurotiomycetes	Eurotiales	ABAR01000155	0	99.78
G2664	SSU	G2664__RIB_15748	Ascomycota	Eurotiomycetes	Eurotiales	KF758801	5e-126	99.2
G2664	SSU	G2664__RIB_15762	Basidiomycota	Agaricomycetes	Hymenochaetales	AY771611	0	95.67
G2664	SSU	G2664__RIB_15781	Ascomycota	Eurotiomycetes	Eurotiales	KF152942	2e-161	99.06
G2664	SSU	G2664__RIB_15782	Basidiomycota	Agaricomycetes	Russulales	AY293156	1e-127	99.6
G2664	SSU	G2664__RIB_15783	Ascomycota	Eurotiomycetes		KC337077	1e-122	98.41
G2664	SSU	G2664__RIB_1582	Ascomycota	Eurotiomycetes	Eurotiales	GU823984	2e-134	99.62
G2664	SSU	G2664__RIB_1585	Ascomycota	Eurotiomycetes		KC337077	1e-72	100
G2664	SSU	G2664__RIB_15872	Ascomycota	Dothideomycetes	Myriangiales	EU304349	5e-148	98.02
G2664	SSU	G2664__RIB_15946	Ascomycota	Eurotiomycetes	Eurotiales	AAKD03000144	2e-107	99.53
G2664	SSU	G2664__RIB_15948	Ascomycota	Eurotiomycetes	Eurotiales	JN397370	1e-127	99.6
G2664	SSU	G2664__RIB_15954	Ascomycota	Eurotiomycetes	Eurotiales	ABAS01000265	0	98.15
G2664	SSU	G2664__RIB_15970	Ascomycota	Eurotiomycetes	Eurotiales	JN397370	0	99.76
G2664	SSU	G2664__RIB_16035	Basidiomycota	Agaricomycetes	Russulales	AY707093	0	99.18
G2664	SSU	G2664__RIB_16040	Basidiomycota	Agaricomycetes	Russulales	AY293156	9e-124	98.8
G2664	SSU	G2664__RIB_16126	Basidiomycota	Fungi other		AAAA02041554	9e-52	99.13
G2664	SSU	G2664__RIB_16241	Basidiomycota	Agaricomycetes	Russulales	AY707093	4e-102	99.04
G2664	SSU	G2664__RIB_16246	Ascomycota	Eurotiomycetes		KC337077	5e-86	99.43
G2664	SSU	G2664__RIB_16254	Basidiomycota	Agaricomycetes		DQ511036	5e-126	99.21
G2664	SSU	G2664__RIB_16277	Ascomycota	Eurotiomycetes	Eurotiales	KF849480	0	99.8
G2664	SSU	G2664__RIB_16288	Ascomycota	Eurotiomycetes	Eurotiales	JN397370	5e-106	99.53
G2664	SSU	G2664__RIB_16299	Ascomycota	Fungi other	Chaetothyriales	KC672706	3e-68	99.31
G2664	SSU	G2664__RIB_16340	Ascomycota	Sordariomycetes	Hypocreales	ABDF02000071	1e-127	99.6
G2664	SSU	G2664__RIB_16359	Basidiomycota	Agaricomycetes	Russulales	U59093	1e-157	99.04
G2664	SSU	G2664__RIB_16365	Ascomycota	Eurotiomycetes	Eurotiales	AOTG01000575	0	98.35
G2664	SSU	G2664__RIB_16388	Ascomycota	Sordariomycetes	Hypocreales	ABDF02000071	2e-129	100
G2664	SSU	G2664__RIB_16389	Ascomycota	Eurotiomycetes		KC337077	4e-127	99.6
G2664	SSU	G2664__RIB_16403	Ascomycota	Eurotiomycetes	Eurotiales	KC962231	9e-175	99.7
G2664	SSU	G2664__RIB_16419	Ascomycota	Eurotiomycetes	Eurotiales	AB032070	0	99.73
G2664	SSU	G2664__RIB_1642	Ascomycota	Eurotiomycetes		KC337077	1e-127	100
G2664	SSU	G2664__RIB_16425	Ascomycota	Eurotiomycetes		KC337077	1e-127	99.6
G2664	SSU	G2664__RIB_16480	Ascomycota	Eurotiomycetes		KC337077	4e-127	99.6
G2664	SSU	G2664__RIB_16558	Ascomycota	Eurotiomycetes		KC337077	2e-129	100
G2664	SSU	G2664__RIB_16580	Ascomycota	Eurotiomycetes		KC337077	3e-154	100
G2664	SSU	G2664__RIB_1660	Ascomycota	Eurotiomycetes	Eurotiales	JN397370	2e-124	98.8
G2664	SSU	G2664__RIB_16643	Ascomycota	Eurotiomycetes	Eurotiales	JN397370	2e-129	100
G2664	SSU	G2664__RIB_16693	Basidiomycota	Agaricomycetes	Polyporales	AF518577	4e-112	97.11
G2664	SSU	G2664__RIB_16698	Ascomycota	Sordariomycetes	Hypocreales	ABDF02000071	2e-129	100
G2664	SSU	G2664__RIB_16710	Basidiomycota	Agaricomycetes	Russulales	U59093	1e-92	99.47
G2664	SSU	G2664__RIB_16718	Ascomycota	Eurotiomycetes	Eurotiales	AAHF01000017	0	98.46
G2664	SSU	G2664__RIB_16756	Ascomycota	Dothideomycetes	Capnodiales	KC674593	3e-79	100
G2664	SSU	G2664__RIB_16766	Ascomycota	Sordariomycetes	Hypocreales	JF807400	0	99.78
G2664	SSU	G2664__RIB_16826	Basidiomycota	Agaricomycetes	Agaricales	JF706314	4e-92	98.95
G2664	SSU	G2664__RIB_16852	Basidiomycota	Agaricomycetes	Agaricales	KF471312	1e-149	98.04
G2664	SSU	G2664__RIB_16863	Ascomycota	Eurotiomycetes	Eurotiales	GU823984	5e-131	100
G2664	SSU	G2664__RIB_16866	Ascomycota	Eurotiomycetes	Eurotiales	KF758801	2e-129	100
G2664	SSU	G2664__RIB_16913	Basidiomycota	Agaricomycetes	Russulales	U59093	0	99.05
G2664	SSU	G2664__RIB_16955	Basidiomycota	Agaricomycetes	Russulales	AY293156	5e-126	99.2
G2664	SSU	G2664__RIB_17008	Ascomycota	Eurotiomycetes	Eurotiales	KF758801	1e-127	99.6
G2664	SSU	G2664__RIB_17016	Ascomycota	Eurotiomycetes	Eurotiales	JN397370	2e-129	100
G2664	SSU	G2664__RIB_17030	Ascomycota	Eurotiomycetes	Eurotiales	EU136028	0	99.2
G2664	SSU	G2664__RIB_17064	Ascomycota	Eurotiomycetes	Eurotiales	KC842215	0	99.73
G2664	SSU	G2664__RIB_1709	Ascomycota	Eurotiomycetes	Eurotiales	KF776917	0	99.8
G2664	SSU	G2664__RIB_17133	Ascomycota	Eurotiomycetes	Eurotiales	AOTG01000575	4e-127	99.6
G2664	SSU	G2664__RIB_17210	Ascomycota	Eurotiomycetes	Eurotiales	EU136028	7e-137	99.63
G2664	SSU	G2664__RIB_17217	Ascomycota	Eurotiomycetes		KC337077	2e-129	100
G2664	SSU	G2664__RIB_17218	Ascomycota	Sordariomycetes	Hypocreales	KC670876	1e-127	99.6
G2664	SSU	G2664__RIB_17249	Ascomycota	Eurotiomycetes	Eurotiales	GU824070	0	99.78
G2664	SSU	G2664__RIB_17277	Ascomycota	Eurotiomycetes	Eurotiales	KF152942	2e-124	99.19
G2664	SSU	G2664__RIB_17295	Ascomycota	Eurotiomycetes		KC337077	9e-129	100
G2664	SSU	G2664__RIB_173	Ascomycota	Archaeorhizomycetes		KF993708	6e-108	97.82
G2664	SSU	G2664__RIB_17308	Ascomycota	Eurotiomycetes	Eurotiales	HM799957	4e-127	99.6
G2664	SSU	G2664__RIB_17309	Ascomycota	Eurotiomycetes	Eurotiales	GU823984	0	100
G2664	SSU	G2664__RIB_1731	Ascomycota	Eurotiomycetes		KC337077	9e-129	100
G2664	SSU	G2664__RIB_17311	Ascomycota	Fungi other		KC337077	1e-57	100
G2664	SSU	G2664__RIB_17326	Ascomycota	Eurotiomycetes		KC337077	9e-79	100
G2664	SSU	G2664__RIB_17339	Ascomycota	Eurotiomycetes		KC337077	5e-167	99.69
G2664	SSU	G2664__RIB_17342	Ascomycota	Eurotiomycetes	Eurotiales	FR774046	5e-162	99.68
G2664	SSU	G2664__RIB_17378	Ascomycota	Eurotiomycetes	Eurotiales	KF758801	3e-123	98.8
G2664	SSU	G2664__RIB_1741	Ascomycota	Eurotiomycetes	Eurotiales	FJ545752	0	99.58
G2664	SSU	G2664__RIB_1742	Ascomycota	Eurotiomycetes	Eurotiales	KF776917	0	99.74
G2664	SSU	G2664__RIB_17436	Ascomycota	Eurotiomycetes	Eurotiales	GU823984	0	99.49
G2664	SSU	G2664__RIB_17442	Basidiomycota	Agaricomycetes	Russulales	AY293156	9e-134	98.88
G2664	SSU	G2664__RIB_17444	Ascomycota	Eurotiomycetes	Eurotiales	AAJN01000138	2e-107	99.54
G2664	SSU	G2664__RIB_17450	Ascomycota	Eurotiomycetes	Eurotiales	GU733353	0	99.76
G2664	SSU	G2664__RIB_17551	Basidiomycota	Fungi other	Russulales	U59060	3e-59	98.47
G2664	SSU	G2664__RIB_17557	Basidiomycota	Agaricomycetes		AY382472	1e-127	99.6
G2664	SSU	G2664__RIB_17588	Basidiomycota	Agaricomycetes	Russulales	AY293156	4e-127	99.6
G2664	SSU	G2664__RIB_17599	Ascomycota	Eurotiomycetes		KC337077	4e-127	99.6
G2664	SSU	G2664__RIB_17667	Ascomycota	Eurotiomycetes	Eurotiales	GU824070	7e-105	100
G2664	SSU	G2664__RIB_17679	Ascomycota	Eurotiomycetes		DQ093693	6e-71	98.68
G2664	SSU	G2664__RIB_1772	Basidiomycota	Agaricomycetes		EF024735	5e-121	98.01
G2664	SSU	G2664__RIB_17734	Ascomycota	Eurotiomycetes	Eurotiales	JN397370	2e-129	100
G2664	SSU	G2664__RIB_17741	Ascomycota	Eurotiomycetes	Eurotiales	FJ545752	1e-127	99.6
G2664	SSU	G2664__RIB_17772	Basidiomycota	Agaricomycetes		DQ511230	1e-126	99.6
G2664	SSU	G2664__RIB_17837	Ascomycota	Eurotiomycetes	Eurotiales	JN397370	1e-127	99.6
G2664	SSU	G2664__RIB_17844	Ascomycota	Eurotiomycetes		KC337077	2e-129	100
G2664	SSU	G2664__RIB_17849	Ascomycota	Fungi other	Chaetothyriales	EU090194	9e-69	98.01
G2664	SSU	G2664__RIB_17861	Ascomycota	Lecanoromycetes	Pertusariales	AF274105	5e-111	96.36
G2664	SSU	G2664__RIB_17905	Ascomycota	Eurotiomycetes	Eurotiales	EU136028	0	99.72
G2664	SSU	G2664__RIB_17913	Basidiomycota	Agaricomycetes	Russulales	AY293156	3e-78	99.38
G2664	SSU	G2664__RIB_17946	Ascomycota	Eurotiomycetes	Eurotiales	EU136028	5e-134	98.88
G2664	SSU	G2664__RIB_17996	Basidiomycota	Agaricomycetes	Trechisporales	AY803753	4e-97	99.49
G2664	SSU	G2664__RIB_18002	Ascomycota	Dothideomycetes	Dothideales	EU167562	0	98.51
G2664	SSU	G2664__RIB_18010	Ascomycota	Eurotiomycetes	Eurotiales	KF758801	1e-126	99.6
G2664	SSU	G2664__RIB_18018	Ascomycota	Eurotiomycetes		KC337077	1e-127	99.6
G2664	SSU	G2664__RIB_18025	Ascomycota	Eurotiomycetes	Eurotiales	JX081272	1e-126	99.6
G2664	SSU	G2664__RIB_18030	Basidiomycota	Agaricomycetes	Russulales	AY293156	1e-92	99.47
G2664	SSU	G2664__RIB_18063	Ascomycota	Eurotiomycetes	Eurotiales	KF152942	4e-124	98.8
G2664	SSU	G2664__RIB_18071	Ascomycota	Eurotiomycetes	Eurotiales	FJ947527	6e-151	99.66
G2664	SSU	G2664__RIB_18099	Ascomycota	Fungi other	Eurotiales	FJ545752	4e-57	100
G2664	SSU	G2664__RIB_18136	Ascomycota	Eurotiomycetes	Eurotiales	JN397370	0	100
G2664	SSU	G2664__RIB_18147	Basidiomycota	Agaricomycetes		AY757265	0	97.71
G2664	SSU	G2664__RIB_18177	Ascomycota	Eurotiomycetes	Eurotiales	KF152942	0	99.76
G2664	SSU	G2664__RIB_18180	Ascomycota	Eurotiomycetes		KC337077	0	100
G2664	SSU	G2664__RIB_18210	Basidiomycota	Agaricomycetes	Russulales	AEOJ01000011	5e-137	98.56
G2664	SSU	G2664__RIB_18230	Ascomycota	Eurotiomycetes	Eurotiales	KC842215	0	99.8
G2664	SSU	G2664__RIB_18239	Ascomycota	Eurotiomycetes	Eurotiales	GU823984	4e-127	99.6
G2664	SSU	G2664__RIB_18244	Ascomycota	Eurotiomycetes	Eurotiales	HQ871898	5e-126	100
G2664	SSU	G2664__RIB_18249	Ascomycota	Eurotiomycetes		FJ358299	7e-85	98.33
G2664	SSU	G2664__RIB_183	Ascomycota	Eurotiomycetes		KC337077	2e-129	100
G2664	SSU	G2664__RIB_1835	Ascomycota	Eurotiomycetes	Eurotiales	GU573850	7e-85	99.43
G2664	SSU	G2664__RIB_18350	Basidiomycota	Agaricomycetes	Agaricales	AF076381	2e-86	99.44
G2664	SSU	G2664__RIB_18354	Ascomycota	Eurotiomycetes	Eurotiales	AAKD03000144	2e-99	98.54
G2664	SSU	G2664__RIB_18394	Ascomycota	Eurotiomycetes	Eurotiales	KF758801	5e-126	99.21
G2664	SSU	G2664__RIB_18412	Basidiomycota	Agaricomycetes	Russulales	AY707093	5e-126	99.6
G2664	SSU	G2664__RIB_1850	Ascomycota	Eurotiomycetes	Eurotiales	AB003946	2e-180	99.71
G2664	SSU	G2664__RIB_18511	Ascomycota	Leotiomycetes		KC215423	9e-109	97.83
G2664	SSU	G2664__RIB_18522	Ascomycota	Eurotiomycetes		EU620161	1e-87	99.44
G2664	SSU	G2664__RIB_18537	Ascomycota	Eurotiomycetes	Eurotiales	JN397370	4e-127	99.6
G2664	SSU	G2664__RIB_18545	Ascomycota	Eurotiomycetes	Eurotiales	FJ947527	3e-79	99.39
G2664	SSU	G2664__RIB_18551	Ascomycota	Eurotiomycetes	Eurotiales	AB003946	8e-117	99.57
G2664	SSU	G2664__RIB_18568	Ascomycota	Eurotiomycetes		KC337077	0	100
G2664	SSU	G2664__RIB_18590	Basidiomycota	Agaricomycetes		EF023592	1e-157	99.35
G2664	SSU	G2664__RIB_18638	Ascomycota	Eurotiomycetes	Eurotiales	KC670680	1e-127	99.6
G2664	SSU	G2664__RIB_18639	Ascomycota	Fungi other	Eurotiales	AB003946	4e-62	99.25
G2664	SSU	G2664__RIB_18681	Ascomycota	Eurotiomycetes	Eurotiales	KF758801	1e-127	99.6
G2664	SSU	G2664__RIB_18696	Ascomycota	Eurotiomycetes	Eurotiales	EF395944	1e-127	99.6
G2664	SSU	G2664__RIB_18718	Ascomycota	Eurotiomycetes	Eurotiales	KF152942	5e-102	99.51
G2664	SSU	G2664__RIB_18721	Basidiomycota	Agaricomycetes		DQ511230	1e-127	99.6
G2664	SSU	G2664__RIB_18776	Ascomycota	Eurotiomycetes	Eurotiales	JN397370	0	100
G2664	SSU	G2664__RIB_18804	Ascomycota	Eurotiomycetes	Eurotiales	AB008413	0	99.76
G2664	SSU	G2664__RIB_18835	Ascomycota	Eurotiomycetes		KC337077	2e-129	100
G2664	SSU	G2664__RIB_18851	Ascomycota	Fungi other		AB671440	2e-162	93.16
G2664	SSU	G2664__RIB_18865	Basidiomycota	Agaricomycetes	Gomphales	AY707095	3e-154	99.67
G2664	SSU	G2664__RIB_18906	Basidiomycota	Agaricomycetes	Agaricales	AF076381	3e-76	99.37
G2664	SSU	G2664__RIB_1891	Ascomycota	Sordariomycetes	Hypocreales	JN941688	0	99.76
G2664	SSU	G2664__RIB_18910	Ascomycota	Eurotiomycetes		DQ093693	3e-108	99.54
G2664	SSU	G2664__RIB_18913	Basidiomycota	Agaricomycetes	Russulales	AY707093	9e-175	99.41
G2664	SSU	G2664__RIB_19002	Ascomycota	Eurotiomycetes	Eurotiales	EF395943	4e-127	99.6
G2664	SSU	G2664__RIB_19075	Ascomycota	Arthoniomycetes		KC674794	1e-87	99.44
G2664	SSU	G2664__RIB_19135	Ascomycota	Eurotiomycetes	Eurotiales	KF758801	5e-126	99.2
G2664	SSU	G2664__RIB_19139	Ascomycota	Eurotiomycetes	Eurotiales	JN256017	5e-126	99.2
G2664	SSU	G2664__RIB_1915	Basidiomycota	Fungi other	Russulales	U59068	3e-68	98.64
G2664	SSU	G2664__RIB_19156	Ascomycota	Eurotiomycetes		AF261658	1e-127	99.6
G2664	SSU	G2664__RIB_19185	Ascomycota	Eurotiomycetes	Eurotiales	KC842215	0	99.75
G2664	SSU	G2664__RIB_192	Ascomycota	Eurotiomycetes		EU620161	7e-120	99.17
G2664	SSU	G2664__RIB_19220	Ascomycota	Eurotiomycetes		KC337077	0	100
G2664	SSU	G2664__RIB_19280	Ascomycota	Eurotiomycetes	Eurotiales	U77377	1e-84	99.43
G2664	SSU	G2664__RIB_1930	Ascomycota	Eurotiomycetes		KC337077	2e-129	100
G2664	SSU	G2664__RIB_19308	Basidiomycota	Agaricomycetes	Russulales	AY293156	0	99.53
G2664	SSU	G2664__RIB_19333	Ascomycota	Eurotiomycetes	Eurotiales	AB032070	0	99.75
G2664	SSU	G2664__RIB_19371	Ascomycota	Eurotiomycetes	Chaetothyriales	KC672578	0	99.71
G2664	SSU	G2664__RIB_19377	Ascomycota	Eurotiomycetes	Eurotiales	KF152942	2e-157	97.55
G2664	SSU	G2664__RIB_19432	Ascomycota	Eurotiomycetes	Eurotiales	KF849480	9e-129	100
G2664	SSU	G2664__RIB_19482	Ascomycota	Eurotiomycetes	Eurotiales	JN397370	1e-112	97.11
G2664	SSU	G2664__RIB_19493	Ascomycota	Sordariomycetes	Hypocreales	ABDF02000071	2e-129	100
G2664	SSU	G2664__RIB_1950	Ascomycota	Eurotiomycetes	Eurotiales	AB003946	3e-116	99.57
G2664	SSU	G2664__RIB_19532	Ascomycota	Eurotiomycetes		KC337077	1e-127	99.6
G2664	SSU	G2664__RIB_19570	Ascomycota	Fungi other	Eurotiales	GU573850	4e-62	99.25
G2664	SSU	G2664__RIB_19579	Ascomycota	Eurotiomycetes	Eurotiales	JN397370	1e-127	99.6
G2664	SSU	G2664__RIB_19633	Ascomycota	Eurotiomycetes	Eurotiales	KF758801	0	98.78
G2664	SSU	G2664__RIB_19652	Ascomycota	Eurotiomycetes	Eurotiales	KF758801	2e-124	98.8
G2664	SSU	G2664__RIB_19653	Ascomycota	Sordariomycetes	Hypocreales	KC670876	2e-129	100
G2664	SSU	G2664__RIB_19666	Ascomycota	Eurotiomycetes		KC337077	9e-114	100
G2664	SSU	G2664__RIB_19724	Basidiomycota	Agaricomycetes	Russulales	AY293156	1e-122	98.41
G2664	SSU	G2664__RIB_19725	Ascomycota	Sordariomycetes		JX066710	1e-167	98.51
G2664	SSU	G2664__RIB_19734	Basidiomycota	Agaricomycetes	Russulales	U59093	0	99.31
G2664	SSU	G2664__RIB_19756	Ascomycota	Eurotiomycetes	Eurotiales	ACJE01000015	1e-87	99.44
G2664	SSU	G2664__RIB_19804	Ascomycota	Eurotiomycetes	Eurotiales	JN397370	2e-124	98.8
G2664	SSU	G2664__RIB_19821	Ascomycota	Eurotiomycetes	Eurotiales	EU835655	0	99.77
G2664	SSU	G2664__RIB_19840	Ascomycota	Eurotiomycetes	Eurotiales	JN974021	2e-114	96.41
G2664	SSU	G2664__RIB_19845	Ascomycota	Eurotiomycetes		KC337077	2e-129	100
G2664	SSU	G2664__RIB_19849	Ascomycota	Eurotiomycetes	Eurotiales	FR774046	3e-128	99.6
G2664	SSU	G2664__RIB_19887	Ascomycota	Eurotiomycetes	Eurotiales	KF691806	2e-120	98.38
G2664	SSU	G2664__RIB_19895	Ascomycota	Eurotiomycetes	Eurotiales	KC670680	2e-124	99.59
G2664	SSU	G2664__RIB_19936	Ascomycota	Eurotiomycetes	Eurotiales	KF758801	2e-124	98.8
G2664	SSU	G2664__RIB_19944	Ascomycota	Eurotiomycetes	Eurotiales	JN397370	1e-127	99.6
G2664	SSU	G2664__RIB_19951	Ascomycota	Sordariomycetes	Hypocreales	GQ253352	3e-139	99.63
G2664	SSU	G2664__RIB_19955	Ascomycota	Eurotiomycetes	Eurotiales	JX396260	1e-127	99.6
G2664	SSU	G2664__RIB_19971	Ascomycota	Eurotiomycetes		KC337077	2e-129	100
G2664	SSU	G2664__RIB_1998	Ascomycota	Eurotiomycetes	Eurotiales	GU824070	0	99.76
G2664	SSU	G2664__RIB_19985	Ascomycota	Sordariomycetes	Sordariales	JQ067910	3e-89	98.92
G2664	SSU	G2664__RIB_19989	Ascomycota	Eurotiomycetes	Eurotiales	KF758801	1e-127	99.6
G2664	SSU	G2664__RIB_20008	Ascomycota	Eurotiomycetes	Eurotiales	M83260	3e-174	99.7
G2664	SSU	G2664__RIB_20024	Basidiomycota	Agaricomycetes	Russulales	AY707093	2e-165	99.38
G2664	SSU	G2664__RIB_20051	Ascomycota	Fungi other		JX303664	4e-102	93.95
G2664	SSU	G2664__RIB_20084	Ascomycota	Eurotiomycetes	Chaetothyriales	KF155208	1e-127	99.6
G2664	SSU	G2664__RIB_20133	Ascomycota	Leotiomycetes		JQ689428	5e-112	100
G2664	SSU	G2664__RIB_20136	Ascomycota	Eurotiomycetes	Eurotiales	JN397370	0	99.73
G2664	SSU	G2664__RIB_20164	Ascomycota	Sordariomycetes	Hypocreales	ABDG02000018	0	99.79
G2664	SSU	G2664__RIB_2019	Ascomycota	Eurotiomycetes		KC337077	3e-139	99.63
G2664	SSU	G2664__RIB_20236	Ascomycota	Eurotiomycetes	Eurotiales	GU733351	4e-127	99.6
G2664	SSU	G2664__RIB_20238	Ascomycota	Eurotiomycetes	Eurotiales	AAKD03000141	3e-164	99.68
G2664	SSU	G2664__RIB_20244	Ascomycota	Eurotiomycetes		KC337077	1e-127	99.6
G2664	SSU	G2664__RIB_20253	Ascomycota	Eurotiomycetes	Eurotiales	GU823984	5e-153	100
G2664	SSU	G2664__RIB_20278	Mucoromycota	Mucoromycetes	Endogonales	JF414214	2e-66	93.18
G2664	SSU	G2664__RIB_2029	Ascomycota	Eurotiomycetes	Eurotiales	ABAS01000265	3e-114	99.56
G2664	SSU	G2664__RIB_20315	Ascomycota	Eurotiomycetes	Eurotiales	JN397370	9e-109	99.54
G2664	SSU	G2664__RIB_20317	Ascomycota	Eurotiomycetes	Eurotiales	M83260	0	99.75
G2664	SSU	G2664__RIB_20331	Basidiomycota	Agaricomycetes	Russulales	AY707093	4e-127	99.6
G2664	SSU	G2664__RIB_20370	Ascomycota	Eurotiomycetes	Eurotiales	GU823984	5e-126	99.2
G2664	SSU	G2664__RIB_20377	Ascomycota	Eurotiomycetes	Eurotiales	GU823984	0	100
G2664	SSU	G2664__RIB_20381	Ascomycota	Eurotiomycetes		KC337077	2e-129	100
G2664	SSU	G2664__RIB_2039	Basidiomycota	Agaricomycetes	Russulales	DQ457626	1e-126	99.6
G2664	SSU	G2664__RIB_20394	Ascomycota	Eurotiomycetes	Eurotiales	JN397370	2e-129	100
G2664	SSU	G2664__RIB_20396	Basidiomycota	Fungi other		EF023389	2e-53	99.16
G2664	SSU	G2664__RIB_2040	Ascomycota	Eurotiomycetes		KC337077	0	99.37
G2664	SSU	G2664__RIB_20440	Ascomycota	Eurotiomycetes	Eurotiales	KC670776	2e-125	99.2
G2664	SSU	G2664__RIB_20456	Ascomycota	Fungi other		KF993708	9e-84	93.78
G2664	SSU	G2664__RIB_20469	Ascomycota	Eurotiomycetes	Eurotiales	GU825333	4e-122	98.4
G2664	SSU	G2664__RIB_2051	Ascomycota	Fungi other	Eurotiales	EF395944	9e-69	99.31
G2664	SSU	G2664__RIB_20512	Ascomycota	Eurotiomycetes		KC337077	0	99.77
G2664	SSU	G2664__RIB_20551	Ascomycota	Eurotiomycetes	Eurotiales	JN397370	2e-129	100
G2664	SSU	G2664__RIB_20561	Ascomycota	Sordariomycetes	Hypocreales	AB013010	0	99.77
G2664	SSU	G2664__RIB_20562	Ascomycota	Eurotiomycetes	Eurotiales	GU823984	2e-129	100
G2664	SSU	G2664__RIB_20593	Basidiomycota	Agaricomycetes		KC671164	2e-95	99.48
G2664	SSU	G2664__RIB_20596	Ascomycota	Eurotiomycetes	Eurotiales	KF776917	0	99.72
G2664	SSU	G2664__RIB_20608	Ascomycota	Eurotiomycetes	Eurotiales	GU733351	7e-125	99.2
G2664	SSU	G2664__RIB_20618	Basidiomycota	Agaricomycetes	Russulales	AY707093	0	99.5
G2664	SSU	G2664__RIB_20619	Ascomycota	Eurotiomycetes		KC337077	1e-127	99.6
G2664	SSU	G2664__RIB_20651	Ascomycota	Eurotiomycetes	Eurotiales	AB032070	0	99.73
G2664	SSU	G2664__RIB_2067	Ascomycota	Eurotiomycetes	Eurotiales	AB003946	6e-82	99.41
G2664	SSU	G2664__RIB_20680	Basidiomycota	Agaricomycetes	Agaricales	AF076381	1e-72	99.34
G2664	SSU	G2664__RIB_20695	Basidiomycota	Agaricomycetes	Agaricales	KF471312	4e-115	97.93
G2664	SSU	G2664__RIB_20703	Ascomycota	Eurotiomycetes	Eurotiales	KF152942	4e-127	99.6
G2664	SSU	G2664__RIB_20723	Basidiomycota	Agaricomycetes	Russulales	U59093	5e-126	99.2
G2664	SSU	G2664__RIB_20777	Ascomycota	Eurotiomycetes	Eurotiales	EU136028	3e-140	98.93
G2664	SSU	G2664__RIB_20793	Basidiomycota	Agaricomycetes	Agaricales	L36659	9e-99	99.5
G2664	SSU	G2664__RIB_20802	Ascomycota	Eurotiomycetes	Eurotiales	GU825333	1e-127	100
G2664	SSU	G2664__RIB_20856	Ascomycota	Eurotiomycetes		KC337077	1e-127	99.6
G2664	SSU	G2664__RIB_20882	Ascomycota	Eurotiomycetes	Eurotiales	KF758801	1e-92	100
G2664	SSU	G2664__RIB_20893	Basidiomycota	Agaricomycetes		DQ511033	5e-126	99.2
G2664	SSU	G2664__RIB_20927	Ascomycota	Fungi other	Eurotiales	AP007172	7e-65	97.92
G2664	SSU	G2664__RIB_20947	Basidiomycota	Agaricomycetes	Russulales	AY293156	0	99.58
G2664	SSU	G2664__RIB_20951	Ascomycota	Eurotiomycetes	Eurotiales	FR774046	3e-128	99.6
G2664	SSU	G2664__RIB_20963	Ascomycota	Eurotiomycetes	Eurotiales	JN397370	0	99.71
G2664	SSU	G2664__RIB_20968	Ascomycota	Eurotiomycetes	Eurotiales	KF152942	3e-119	99.58
G2664	SSU	G2664__RIB_20989	Ascomycota	Eurotiomycetes	Eurotiales	KF849480	9e-129	100
G2664	SSU	G2664__RIB_2100	Ascomycota	Eurotiomycetes	Eurotiales	AM270052	0	99.48
G2664	SSU	G2664__RIB_21004	Ascomycota	Eurotiomycetes	Eurotiales	FJ430768	1e-117	97.21
G2664	SSU	G2664__RIB_21018	Basidiomycota	Agaricomycetes	Russulales	AY293156	0	98.56
G2664	SSU	G2664__RIB_2102	Ascomycota	Eurotiomycetes	Eurotiales	AB008406	0	98.95
G2664	SSU	G2664__RIB_21036	Basidiomycota	Agaricomycetes	Polyporales	AF518577	0	99.48
G2664	SSU	G2664__RIB_21056	Ascomycota	Eurotiomycetes	Eurotiales	AF245235	5e-86	99.43
G2664	SSU	G2664__RIB_21064	Ascomycota	Eurotiomycetes	Eurotiales	JN397370	8e-171	99.7
G2664	SSU	G2664__RIB_21067	Basidiomycota	Agaricomycetes		EF053586	5e-126	99.2
G2664	SSU	G2664__RIB_2108	Ascomycota	Eurotiomycetes	Eurotiales	JN397370	1e-73	99.35
G2664	SSU	G2664__RIB_21099	Ascomycota	Eurotiomycetes	Eurotiales	JN397370	0	99.73
G2664	SSU	G2664__RIB_21101	Ascomycota	Eurotiomycetes	Eurotiales	KF849480	0	99.79
G2664	SSU	G2664__RIB_21107	Ascomycota	Eurotiomycetes	Eurotiales	KF758801	1e-127	99.6
G2664	SSU	G2664__RIB_21112	Ascomycota	Eurotiomycetes	Eurotiales	GU823984	2e-129	100
G2664	SSU	G2664__RIB_21120	Ascomycota	Fungi other	Eurotiales	KF152942	3e-64	99.27
G2664	SSU	G2664__RIB_2113	Ascomycota	Eurotiomycetes	Eurotiales	KF758801	2e-81	96.72
G2664	SSU	G2664__RIB_21182	Ascomycota	Eurotiomycetes	Eurotiales	KF758801	6e-166	99.69
G2664	SSU	G2664__RIB_21194	Basidiomycota	Fungi other	Russulales	AEOJ01000011	1e-69	97.44
G2664	SSU	G2664__RIB_21204	Ascomycota	Fungi other	Eurotiales	GU573850	5e-69	99.32
G2664	SSU	G2664__RIB_21212	Ascomycota	Eurotiomycetes		KC337077	0	100
G2664	SSU	G2664__RIB_21220	Ascomycota	Eurotiomycetes		KC337077	1e-127	99.6
G2664	SSU	G2664__RIB_21254	Ascomycota	Eurotiomycetes	Eurotiales	AB002063	1e-132	99.62
G2664	SSU	G2664__RIB_21307	Ascomycota	Eurotiomycetes	Eurotiales	GU823984	2e-90	98.93
G2664	SSU	G2664__RIB_21324	Basidiomycota	Agaricomycetes		EF024735	2e-115	98.32
G2664	SSU	G2664__RIB_21335	Ascomycota	Eurotiomycetes	Eurotiales	KF758801	5e-126	99.2
G2664	SSU	G2664__RIB_21364	Ascomycota	Eurotiomycetes		KC337077	1e-127	99.6
G2664	SSU	G2664__RIB_21366	Ascomycota	Eurotiomycetes	Eurotiales	AB032070	1e-127	99.6
G2664	SSU	G2664__RIB_21383	Ascomycota	Eurotiomycetes	Eurotiales	GU825722	1e-127	99.6
G2664	SSU	G2664__RIB_214	Ascomycota	Eurotiomycetes	Eurotiales	GU733348	2e-125	99.2
G2664	SSU	G2664__RIB_21426	Basidiomycota	Agaricomycetes	Agaricales	AF076381	3e-94	98.97
G2664	SSU	G2664__RIB_21433	Ascomycota	Eurotiomycetes	Eurotiales	KF152942	1e-127	99.6
G2664	SSU	G2664__RIB_21459	Ascomycota	Eurotiomycetes	Eurotiales	KF758801	4e-127	99.6
G2664	SSU	G2664__RIB_21525	Ascomycota	Eurotiomycetes	Eurotiales	GU825367	5e-126	99.2
G2664	SSU	G2664__RIB_21531	Ascomycota	Eurotiomycetes		KC337077	1e-127	99.6
G2664	SSU	G2664__RIB_21548	Ascomycota	Leotiomycetes	Helotiales	HM628675	7e-92	100
G2664	SSU	G2664__RIB_21558	Ascomycota	Fungi other		KC337077	7e-60	100
G2664	SSU	G2664__RIB_21618	Ascomycota	Eurotiomycetes	Eurotiales	GU824070	1e-127	99.6
G2664	SSU	G2664__RIB_21632	Ascomycota	Eurotiomycetes	Eurotiales	KF849480	9e-129	100
G2664	SSU	G2664__RIB_21654	Ascomycota	Eurotiomycetes	Eurotiales	KF152942	0	98.73
G2664	SSU	G2664__RIB_21659	Ascomycota	Eurotiomycetes	Eurotiales	JN397370	1e-127	99.6
G2664	SSU	G2664__RIB_21707	Ascomycota	Eurotiomycetes	Eurotiales	AP007172	1e-93	99.47
G2664	SSU	G2664__RIB_21723	Ascomycota	Dothideomycetes	Botryosphaeriales	U42477	1e-127	99.6
G2664	SSU	G2664__RIB_21726	Ascomycota	Lecanoromycetes		JX098857	2e-104	99.52
G2664	SSU	G2664__RIB_21747	Ascomycota	Fungi other		DQ248313	6e-53	99.15
G2664	SSU	G2664__RIB_21775	Basidiomycota	Agaricomycetes	Russulales	AY707093	1e-127	99.6
G2664	SSU	G2664__RIB_21779	Ascomycota	Eurotiomycetes	Eurotiales	KF758801	3e-154	99.67
G2664	SSU	G2664__RIB_21824	Ascomycota	Eurotiomycetes	Eurotiales	KF152942	3e-149	99.66
G2664	SSU	G2664__RIB_21827	Ascomycota	Eurotiomycetes	Eurotiales	JN397370	1e-127	99.6
G2664	SSU	G2664__RIB_21831	Ascomycota	Eurotiomycetes	Eurotiales	JN397370	1e-127	99.6
G2664	SSU	G2664__RIB_21853	Basidiomycota	Agaricomycetes	Russulales	AY293156	0	99.58
G2664	SSU	G2664__RIB_21860	Ascomycota	Eurotiomycetes	Eurotiales	AB032070	0	99.79
G2664	SSU	G2664__RIB_21877	Ascomycota	Orbiliomycetes	Orbiliales	AJ001990	5e-172	98.54
G2664	SSU	G2664__RIB_21921	Ascomycota	Eurotiomycetes	Eurotiales	AB032070	0	99.78
G2664	SSU	G2664__RIB_21932	Mucoromycota	Mucoromycetes	Endogonales	JF414200	4e-72	94.86
G2664	SSU	G2664__RIB_21983	Ascomycota	Eurotiomycetes	Eurotiales	KF758801	1e-127	99.6
G2664	SSU	G2664__RIB_22023	Basidiomycota	Agaricomycetes	Russulales	AEOJ01000011	1e-99	98.1
G2664	SSU	G2664__RIB_22025	Ascomycota	Eurotiomycetes	Eurotiales	KF758801	3e-118	98.75
G2664	SSU	G2664__RIB_22027	Ascomycota	Eurotiomycetes	Eurotiales	KC842215	2e-150	99.66
G2664	SSU	G2664__RIB_22051	Ascomycota	Eurotiomycetes		KC337077	2e-129	100
G2664	SSU	G2664__RIB_2206	Ascomycota	Eurotiomycetes	Eurotiales	M83260	0	99.79
G2664	SSU	G2664__RIB_22095	Ascomycota	Fungi other		JF836020	3e-90	94.5
G2664	SSU	G2664__RIB_22104	Basidiomycota	Agaricomycetes	Russulales	U59093	2e-129	100
G2664	SSU	G2664__RIB_22141	Ascomycota	Eurotiomycetes	Eurotiales	AORT01023440	1e-98	97.63
G2664	SSU	G2664__RIB_22150	Ascomycota	Leotiomycetes	Helotiales	AY903749	9e-124	98.42
G2664	SSU	G2664__RIB_22205	Basidiomycota	Agaricomycetes	Russulales	DQ457626	0	98.96
G2664	SSU	G2664__RIB_22229	Ascomycota	Eurotiomycetes	Eurotiales	GU823984	1e-126	100
G2664	SSU	G2664__RIB_22249	Ascomycota	Eurotiomycetes	Eurotiales	AAHF01000017	0	99.09
G2664	SSU	G2664__RIB_22252	Ascomycota	Eurotiomycetes		KC337077	1e-127	99.6
G2664	SSU	G2664__RIB_22253	Ascomycota	Eurotiomycetes	Eurotiales	AB003946	4e-94	99.48
G2664	SSU	G2664__RIB_22273	Ascomycota	Eurotiomycetes	Eurotiales	JN397370	0	99.77
G2664	SSU	G2664__RIB_22279	Ascomycota	Eurotiomycetes	Eurotiales	HM590654	0	99.18
G2664	SSU	G2664__RIB_2229	Ascomycota	Eurotiomycetes	Eurotiales	AF245270	4e-127	99.6
G2664	SSU	G2664__RIB_22325	Ascomycota	Eurotiomycetes		KC337077	2e-129	100
G2664	SSU	G2664__RIB_22336	Ascomycota	Eurotiomycetes		KC337077	9e-119	100
G2664	SSU	G2664__RIB_22374	Ascomycota	Eurotiomycetes	Eurotiales	AY256241	1e-127	99.6
G2664	SSU	G2664__RIB_22400	Ascomycota	Eurotiomycetes		KC337077	0	100
G2664	SSU	G2664__RIB_22403	Basidiomycota	Agaricomycetes	Russulales	AY707093	0	98.41
G2664	SSU	G2664__RIB_22423	Basidiomycota	Fungi other	Trechisporales	JQ689450	3e-53	99.15
G2664	SSU	G2664__RIB_22425	Ascomycota	Eurotiomycetes	Eurotiales	JN397370	2e-129	100
G2664	SSU	G2664__RIB_2243	Basidiomycota	Fungi other	Russulales	AY293156	2e-56	98.41
G2664	SSU	G2664__RIB_22435	Ascomycota	Eurotiomycetes		DQ093693	7e-125	99.59
G2664	SSU	G2664__RIB_22442	Basidiomycota	Agaricomycetes	Russulales	AY707093	5e-172	97.46
G2664	SSU	G2664__RIB_22447	Ascomycota	Eurotiomycetes	Eurotiales	KF758801	5e-126	99.2
G2664	SSU	G2664__RIB_2250	Ascomycota	Eurotiomycetes		KC337077	2e-129	100
G2664	SSU	G2664__RIB_2252	Ascomycota	Eurotiomycetes		EU620162	1e-82	99.41
G2664	SSU	G2664__RIB_22581	Ascomycota	Eurotiomycetes	Eurotiales	JN397370	1e-127	99.6
G2664	SSU	G2664__RIB_22587	Ascomycota	Eurotiomycetes	Eurotiales	KF152942	2e-156	99.03
G2664	SSU	G2664__RIB_22596	Ascomycota	Eurotiomycetes	Eurotiales	GU823984	1e-111	97.1
G2664	SSU	G2664__RIB_22597	Ascomycota	Sordariomycetes	Hypocreales	FJ895305	0	97.68
G2664	SSU	G2664__RIB_22598	Ascomycota	Eurotiomycetes	Eurotiales	KF849480	0	99.79
G2664	SSU	G2664__RIB_22606	Ascomycota	Eurotiomycetes		KC337077	1e-127	99.6
G2664	SSU	G2664__RIB_2263	Ascomycota	Eurotiomycetes	Eurotiales	KF758801	2e-129	100
G2664	SSU	G2664__RIB_22633	Basidiomycota	Agaricomycetes	Agaricales	AY705952	1e-106	95.47
G2664	SSU	G2664__RIB_22696	Ascomycota	Eurotiomycetes	Eurotiales	KF152942	1e-174	99.12
G2664	SSU	G2664__RIB_22703	Ascomycota	Eurotiomycetes	Eurotiales	GU573850	3e-89	99.45
G2664	SSU	G2664__RIB_22732	Basidiomycota	Agaricomycetes	Russulales	AY707093	0	99.29
G2664	SSU	G2664__RIB_22747	Ascomycota	Eurotiomycetes	Eurotiales	EF395944	2e-115	99.56
G2664	SSU	G2664__RIB_22777	Basidiomycota	Agaricomycetes	Russulales	AY707093	0	99.57
G2664	SSU	G2664__RIB_22829	Basidiomycota	Agaricomycetes	Russulales	AY293156	0	99.38
G2664	SSU	G2664__RIB_22840	Ascomycota	Eurotiomycetes	Eurotiales	EF395944	6e-126	99.6
G2664	SSU	G2664__RIB_22870	Ascomycota	Eurotiomycetes	Eurotiales	KF849480	2e-115	100
G2664	SSU	G2664__RIB_22876	Ascomycota	Eurotiomycetes		KC337077	4e-127	99.6
G2664	SSU	G2664__RIB_22903	Ascomycota	Eurotiomycetes		KC337077	4e-127	99.6
G2664	SSU	G2664__RIB_22945	Ascomycota	Lecanoromycetes	Agyriales	AF119501	4e-70	99.32
G2664	SSU	G2664__RIB_22962	Ascomycota	Eurotiomycetes		KC337077	2e-129	100
G2664	SSU	G2664__RIB_2302	Ascomycota	Eurotiomycetes	Eurotiales	EF395943	0	99.76
G2664	SSU	G2664__RIB_23029	Ascomycota	Eurotiomycetes	Chaetothyriales	KC672595	0	99.49
G2664	SSU	G2664__RIB_23035	Ascomycota	Sordariomycetes	Microascales	HG530965	2e-76	99.37
G2664	SSU	G2664__RIB_23078	Ascomycota	Eurotiomycetes	Eurotiales	AAJN01000138	7e-110	99.54
G2664	SSU	G2664__RIB_23080	Ascomycota	Sordariomycetes	Xylariales	EU089663	1e-112	99.12
G2664	SSU	G2664__RIB_23143	Ascomycota	Eurotiomycetes	Eurotiales	EF411061	0	99.78
G2664	SSU	G2664__RIB_23146	Ascomycota	Eurotiomycetes	Eurotiales	M83260	0	99.78
G2664	SSU	G2664__RIB_23164	Ascomycota	Eurotiomycetes	Eurotiales	JN397370	0	99.74
G2664	SSU	G2664__RIB_23199	Ascomycota	Fungi other		EF468714	1e-57	92.9
G2664	SSU	G2664__RIB_23200	Ascomycota	Eurotiomycetes	Eurotiales	GU733359	1e-127	99.6
G2664	SSU	G2664__RIB_23214	Basidiomycota	Fungi other	Russulales	U59093	3e-69	99.32
G2664	SSU	G2664__RIB_23232	Ascomycota	Eurotiomycetes	Eurotiales	AB003946	6e-82	99.41
G2664	SSU	G2664__RIB_23240	Basidiomycota	Agaricomycetes	Atheliales	M55638	1e-77	99.38
G2664	SSU	G2664__RIB_23243	Ascomycota	Eurotiomycetes		KC337077	1e-127	99.6
G2664	SSU	G2664__RIB_23317	Ascomycota	Eurotiomycetes	Eurotiales	JN397370	0	100
G2664	SSU	G2664__RIB_23321	Ascomycota	Eurotiomycetes	Eurotiales	GU825367	2e-129	100
G2664	SSU	G2664__RIB_23325	Ascomycota	Leotiomycetes	Thelebolales	FM178231	1e-112	96.37
G2664	SSU	G2664__RIB_23337	Basidiomycota	Wallemiomycetes	Geminibasidiales	JX242894	0	99.49
G2664	SSU	G2664__RIB_23357	Ascomycota	Eurotiomycetes	Eurotiales	JN397370	1e-127	99.6
G2664	SSU	G2664__RIB_23359	Ascomycota	Eurotiomycetes	Eurotiales	GU568129	1e-127	99.6
G2664	SSU	G2664__RIB_23378	Ascomycota	Sordariomycetes	Sordariales	AY502933	9e-124	98.8
G2664	SSU	G2664__RIB_23381	Ascomycota	Eurotiomycetes	Eurotiales	AB032070	9e-180	99.71
G2664	SSU	G2664__RIB_23383	Basidiomycota	Fungi other	Agaricales	AF076381	1e-67	99.3
G2664	SSU	G2664__RIB_23402	Basidiomycota	Agaricomycetes	Russulales	U59093	5e-126	99.2
G2664	SSU	G2664__RIB_23452	Ascomycota	Eurotiomycetes	Eurotiales	FJ545752	0	99.43
G2664	SSU	G2664__RIB_23456	Ascomycota	Eurotiomycetes	Eurotiales	D88323	1e-127	99.6
G2664	SSU	G2664__RIB_23467	Ascomycota	Eurotiomycetes	Eurotiales	KF758801	0	98.71
G2664	SSU	G2664__RIB_23470	Ascomycota	Eurotiomycetes		KC337077	2e-129	100
G2664	SSU	G2664__RIB_23523	Basidiomycota	Agaricomycetes	Russulales	AEOJ01000011	5e-137	98.56
G2664	SSU	G2664__RIB_23524	Ascomycota	Eurotiomycetes	Eurotiales	KF758801	2e-129	100
G2664	SSU	G2664__RIB_23542	Basidiomycota	Agaricomycetes	Russulales	U59093	4e-127	99.6
G2664	SSU	G2664__RIB_23568	Ascomycota	Eurotiomycetes	Eurotiales	AKCU01000548	0	99.55
G2664	SSU	G2664__RIB_23595	Ascomycota	Eurotiomycetes		KC337077	1e-127	99.6
G2664	SSU	G2664__RIB_23646	Ascomycota	Eurotiomycetes		KC337077	2e-129	100
G2664	SSU	G2664__RIB_23657	Ascomycota	Eurotiomycetes	Eurotiales	FJ430768	1e-127	99.6
G2664	SSU	G2664__RIB_23660	Basidiomycota	Agaricomycetes		EF024011	0	99.27
G2664	SSU	G2664__RIB_23661	Ascomycota	Eurotiomycetes	Eurotiales	JN397370	2e-125	99.6
G2664	SSU	G2664__RIB_23663	Ascomycota	Eurotiomycetes	Eurotiales	JN397370	2e-129	100
G2664	SSU	G2664__RIB_23680	Ascomycota	Eurotiomycetes	Eurotiales	GQ120164	3e-108	99.09
G2664	SSU	G2664__RIB_23692	Ascomycota	Sordariomycetes	Hypocreales	GQ253352	0	99.75
G2664	SSU	G2664__RIB_2371	Ascomycota	Eurotiomycetes	Eurotiales	JN397370	0	99.76
G2664	SSU	G2664__RIB_23790	Ascomycota	Eurotiomycetes		DQ093693	1e-122	98.41
G2664	SSU	G2664__RIB_23806	Ascomycota	Fungi other		KC337077	1e-62	100
G2664	SSU	G2664__RIB_23828	Ascomycota	Eurotiomycetes	Eurotiales	KF152942	0	99.76
G2664	SSU	G2664__RIB_23853	Ascomycota	Eurotiomycetes	Eurotiales	GU824070	0	99.77
G2664	SSU	G2664__RIB_23875	Ascomycota	Eurotiomycetes	Eurotiales	KF152942	0	98.93
G2664	SSU	G2664__RIB_23885	Ascomycota	Eurotiomycetes	Eurotiales	KF849480	5e-126	99.2
G2664	SSU	G2664__RIB_23914	Ascomycota	Eurotiomycetes	Eurotiales	AKCU01000548	2e-101	99.51
G2664	SSU	G2664__RIB_23916	Basidiomycota	Agaricomycetes	Polyporales	AF334917	7e-80	98.81
G2664	SSU	G2664__RIB_2394	Ascomycota	Eurotiomycetes	Eurotiales	AB032070	0	99.58
G2664	SSU	G2664__RIB_23943	Basidiomycota	Agaricomycetes	Russulales	AY293156	0	98.69
G2664	SSU	G2664__RIB_23945	Ascomycota	Eurotiomycetes		KC337077	2e-129	100
G2664	SSU	G2664__RIB_23965	Ascomycota	Eurotiomycetes	Eurotiales	GU733348	1e-126	99.6
G2664	SSU	G2664__RIB_24002	Ascomycota	Eurotiomycetes	Eurotiales	KF849480	1e-127	99.6
G2664	SSU	G2664__RIB_24048	Ascomycota	Eurotiomycetes		KC337077	1e-127	99.6
G2664	SSU	G2664__RIB_24078	Ascomycota	Eurotiomycetes	Eurotiales	KC670680	0	99.76
G2664	SSU	G2664__RIB_24079	Ascomycota	Eurotiomycetes	Eurotiales	GQ120164	3e-131	97.46
G2664	SSU	G2664__RIB_24112	Ascomycota	Eurotiomycetes	Eurotiales	AAKD03000144	5e-102	99.51
G2664	SSU	G2664__RIB_24125	Ascomycota	Eurotiomycetes	Eurotiales	AB031391	0	99.74
G2664	SSU	G2664__RIB_2414	Ascomycota	Eurotiomycetes		KC337077	8e-155	99.67
G2664	SSU	G2664__RIB_24214	Ascomycota	Dothideomycetes	Botryosphaeriales	U42477	2e-135	100
G2664	SSU	G2664__RIB_24218	Ascomycota	Sordariomycetes	Hypocreales	HQ232202	3e-111	99.55
G2664	SSU	G2664__RIB_24244	Ascomycota	Eurotiomycetes	Eurotiales	GU825722	4e-117	99.57
G2664	SSU	G2664__RIB_24255	Ascomycota	Eurotiomycetes	Eurotiales	JN397370	0	100
G2664	SSU	G2664__RIB_24302	Basidiomycota	Agaricomycetes	Polyporales	AF518577	0	99.73
G2664	SSU	G2664__RIB_24320	Ascomycota	Eurotiomycetes	Eurotiales	GU825367	2e-129	100
G2664	SSU	G2664__RIB_2433	Ascomycota	Eurotiomycetes	Eurotiales	JN397370	2e-129	100
G2664	SSU	G2664__RIB_24333	Basidiomycota	Agaricomycetes	Russulales	AEOJ01000011	1e-114	97.92
G2664	SSU	G2664__RIB_24339	Ascomycota	Eurotiomycetes		KC337077	3e-113	100
G2664	SSU	G2664__RIB_2438	Basidiomycota	Agaricomycetes	Russulales	AY293156	1e-127	99.6
G2664	SSU	G2664__RIB_24401	Ascomycota	Eurotiomycetes	Eurotiales	JN397370	5e-121	98.01
G2664	SSU	G2664__RIB_24453	Basidiomycota	Wallemiomycetes	Geminibasidiales	KC751418	1e-127	99.6
G2664	SSU	G2664__RIB_24465	Basidiomycota	Agaricomycetes	Russulales	AY707093	4e-102	99.04
G2664	SSU	G2664__RIB_24486	Ascomycota	Eurotiomycetes	Eurotiales	GU733351	1e-126	99.6
G2664	SSU	G2664__RIB_24492	Ascomycota	Eurotiomycetes	Eurotiales	GU573850	4e-82	99.41
G2664	SSU	G2664__RIB_24503	Ascomycota	Eurotiomycetes	Eurotiales	GU823984	1e-127	99.6
G2664	SSU	G2664__RIB_24525	Ascomycota	Eurotiomycetes	Eurotiales	KF849480	2e-129	100
G2664	SSU	G2664__RIB_24528	Ascomycota	Eurotiomycetes	Eurotiales	M83260	0	99.73
G2664	SSU	G2664__RIB_2454	Ascomycota	Sordariomycetes	Hypocreales	ABDF02000071	0	100
G2664	SSU	G2664__RIB_24568	Ascomycota	Eurotiomycetes	Eurotiales	JX396260	6e-156	99.67
G2664	SSU	G2664__RIB_24571	Ascomycota	Fungi other		KC337077	2e-55	100
G2664	SSU	G2664__RIB_24613	Ascomycota	Eurotiomycetes	Eurotiales	GU733348	1e-127	99.6
G2664	SSU	G2664__RIB_24614	Ascomycota	Eurotiomycetes	Eurotiales	AOTG01000575	5e-126	99.2
G2664	SSU	G2664__RIB_24635	Ascomycota	Leotiomycetes	Erysiphales	AB120751	2e-120	98.38
G2664	SSU	G2664__RIB_24643	Ascomycota	Eurotiomycetes	Eurotiales	JN397370	1e-96	96.3
G2664	SSU	G2664__RIB_24645	Ascomycota	Sordariomycetes	Hypocreales	GU823680	0	99.75
G2664	SSU	G2664__RIB_24657	Ascomycota	Fungi other		GU214605	8e-52	94.78
G2664	SSU	G2664__RIB_24675	Ascomycota	Eurotiomycetes	Eurotiales	AORT01023440	3e-176	98.31
G2664	SSU	G2664__RIB_2468	Ascomycota	Sordariomycetes	Hypocreales	AF281178	5e-86	96.88
G2664	SSU	G2664__RIB_2471	Ascomycota	Eurotiomycetes		KC337077	2e-129	100
G2664	SSU	G2664__RIB_24715	Ascomycota	Eurotiomycetes	Eurotiales	KF849480	0	99.77
G2664	SSU	G2664__RIB_24720	Ascomycota	Eurotiomycetes	Eurotiales	AF245266	4e-127	99.6
G2664	SSU	G2664__RIB_24721	Ascomycota	Eurotiomycetes		AY391833	7e-125	99.59
G2664	SSU	G2664__RIB_24724	Ascomycota	Eurotiomycetes		KC337077	2e-129	100
G2664	SSU	G2664__RIB_24734	Ascomycota	Eurotiomycetes	Chaetothyriales	EF053595	1e-127	99.6
G2664	SSU	G2664__RIB_24796	Ascomycota	Eurotiomycetes	Eurotiales	EU835655	5e-121	99.58
G2664	SSU	G2664__RIB_24806	Ascomycota	Sordariomycetes	Hypocreales	HQ232201	0	99.09
G2664	SSU	G2664__RIB_24814	Ascomycota	Eurotiomycetes	Eurotiales	KF849480	3e-113	99.56
G2664	SSU	G2664__RIB_2490	Ascomycota	Fungi other		FR774046	2e-81	93.27
G2664	SSU	G2664__RIB_24930	Ascomycota	Eurotiomycetes	Eurotiales	KF758801	0	99.78
G2664	SSU	G2664__RIB_24936	Ascomycota	Eurotiomycetes	Eurotiales	JN397370	2e-129	100
G2664	SSU	G2664__RIB_24945	Ascomycota	Eurotiomycetes	Eurotiales	KC670824	0	99.78
G2664	SSU	G2664__RIB_24980	Basidiomycota	Agaricomycetes	Russulales	AY707093	9e-114	99.56
G2664	SSU	G2664__RIB_24983	Ascomycota	Eurotiomycetes	Eurotiales	EU136028	2e-101	99.51
G2664	SSU	G2664__RIB_24991	Basidiomycota	Agaricomycetes	Russulales	AEOJ01000011	2e-102	98.14
G2664	SSU	G2664__RIB_24994	Basidiomycota	Agaricomycetes	Russulales	AY707093	4e-127	99.6
G2664	SSU	G2664__RIB_25090	Ascomycota	Eurotiomycetes	Eurotiales	KF758801	4e-127	99.6
G2664	SSU	G2664__RIB_25124	Ascomycota	Eurotiomycetes	Eurotiales	JN397370	4e-127	100
G2664	SSU	G2664__RIB_25159	Ascomycota	Sordariomycetes	Hypocreales	JX121089	4e-72	99.34
G2664	SSU	G2664__RIB_25172	Ascomycota	Eurotiomycetes	Eurotiales	KF849480	9e-175	100
G2664	SSU	G2664__RIB_25175	Ascomycota	Eurotiomycetes		KF545538	1e-77	100
G2664	SSU	G2664__RIB_25176	Ascomycota	Eurotiomycetes	Eurotiales	AB003808	4e-127	99.6
G2664	SSU	G2664__RIB_25188	Ascomycota	Eurotiomycetes	Eurotiales	JN397370	2e-157	99.67
G2664	SSU	G2664__RIB_2523	Basidiomycota	Agaricomycetes	Gomphales	AY707095	5e-157	99.67
G2664	SSU	G2664__RIB_25272	Ascomycota	Eurotiomycetes	Eurotiales	AAJN01000138	1e-103	99.52
G2664	SSU	G2664__RIB_25327	Ascomycota	Eurotiomycetes	Eurotiales	KF152942	0	99.75
G2664	SSU	G2664__RIB_25353	Ascomycota	Fungi other	Eurotiales	GU573850	1e-57	99.2
G2664	SSU	G2664__RIB_25373	Ascomycota	Eurotiomycetes	Eurotiales	AB003946	2e-114	99.56
G2664	SSU	G2664__RIB_25381	Ascomycota	Eurotiomycetes	Eurotiales	JN397370	9e-129	100
G2664	SSU	G2664__RIB_25409	Ascomycota	Eurotiomycetes	Eurotiales	KF152942	0	99.77
G2664	SSU	G2664__RIB_25417	Ascomycota	Sordariomycetes	Hypocreales	ABDF02000071	7e-110	96.67
G2664	SSU	G2664__RIB_25419	Ascomycota	Eurotiomycetes	Eurotiales	JN397370	0	100
G2664	SSU	G2664__RIB_25444	Ascomycota	Eurotiomycetes	Eurotiales	JN397370	5e-121	100
G2664	SSU	G2664__RIB_25448	Ascomycota	Eurotiomycetes	Eurotiales	AAKD03000144	1e-118	99.16
G2664	SSU	G2664__RIB_25496	Ascomycota	Dothideomycetes	Botryosphaeriales	U42476	1e-127	99.6
G2664	SSU	G2664__RIB_25509	Ascomycota	Eurotiomycetes	Eurotiales	AAKD03000144	5e-121	99.17
G2664	SSU	G2664__RIB_25559	Ascomycota	Eurotiomycetes		JN825677	1e-127	99.6
G2664	SSU	G2664__RIB_25564	Ascomycota	Eurotiomycetes		KC337077	1e-97	100
G2664	SSU	G2664__RIB_25572	Ascomycota	Eurotiomycetes	Eurotiales	EU136028	0	99.73
G2664	SSU	G2664__RIB_25579	Ascomycota	Fungi other		KC337077	7e-60	99.22
G2664	SSU	G2664__RIB_256	Ascomycota	Fungi other	Eurotiales	AAKD03000144	2e-51	99.12
G2664	SSU	G2664__RIB_25601	Ascomycota	Eurotiomycetes	Eurotiales	KF849480	1e-127	99.6
G2664	SSU	G2664__RIB_25603	Ascomycota	Eurotiomycetes		KC337077	9e-79	100
G2664	SSU	G2664__RIB_25628	Ascomycota	Eurotiomycetes	Eurotiales	JN397370	0	99.76
G2664	SSU	G2664__RIB_25644	Ascomycota	Eurotiomycetes	Eurotiales	GU824070	2e-129	100
G2664	SSU	G2664__RIB_25693	Ascomycota	Sordariomycetes	uncultured	FJ848497	7e-135	99.62
G2664	SSU	G2664__RIB_25710	Ascomycota	Eurotiomycetes	Eurotiales	JN397370	1e-127	99.6
G2664	SSU	G2664__RIB_25721	Ascomycota	Eurotiomycetes	Eurotiales	EU136028	4e-117	99.57
G2664	SSU	G2664__RIB_25734	Ascomycota	Sordariomycetes	Hypocreales	ABDF02000071	1e-127	99.6
G2664	SSU	G2664__RIB_25754	Ascomycota	Eurotiomycetes	Eurotiales	JN546127	3e-118	97.97
G2664	SSU	G2664__RIB_25761	Ascomycota	Fungi other		KF758801	1e-106	94.78
G2664	SSU	G2664__RIB_2580	Ascomycota	Eurotiomycetes	Chaetothyriales	JN856010	3e-144	99.64
G2664	SSU	G2664__RIB_25829	Ascomycota	Geoglossomycetes	Geoglossales	KC671703	2e-125	99.6
G2664	SSU	G2664__RIB_25837	Ascomycota	Fungi other		FJ545752	5e-106	94.44
G2664	SSU	G2664__RIB_25864	Ascomycota	Eurotiomycetes	Eurotiales	GU823984	1e-127	99.6
G2664	SSU	G2664__RIB_25866	Basidiomycota	Agaricomycetes	Russulales	AY293156	2e-160	99.36
G2664	SSU	G2664__RIB_25903	Basidiomycota	Wallemiomycetes	Geminibasidiales	JX242894	2e-155	99.34
G2664	SSU	G2664__RIB_25934	Ascomycota	Eurotiomycetes	Eurotiales	GU825367	2e-129	100
G2664	SSU	G2664__RIB_25950	Basidiomycota	Agaricomycetes	Hymenochaetales	AY771611	5e-86	99.44
G2664	SSU	G2664__RIB_25981	Basidiomycota	Agaricomycetes		KC672651	9e-89	98.4
G2664	SSU	G2664__RIB_25991	Ascomycota	Eurotiomycetes	Eurotiales	JN397370	2e-129	100
G2664	SSU	G2664__RIB_26006	Ascomycota	Dothideomycetes	Pleosporales	KC672738	2e-172	99.4
G2664	SSU	G2664__RIB_2602	Ascomycota	Eurotiomycetes	Eurotiales	AOTG01000575	2e-146	99.31
G2664	SSU	G2664__RIB_26072	Ascomycota	Eurotiomycetes	Eurotiales	KF849480	5e-126	99.6
G2664	SSU	G2664__RIB_26079	Ascomycota	Eurotiomycetes	Eurotiales	AOTG01000575	2e-125	99.2
G2664	SSU	G2664__RIB_26083	Ascomycota	Eurotiomycetes	Eurotiales	JN397370	2e-129	100
G2664	SSU	G2664__RIB_26121	Ascomycota	Eurotiomycetes		KC337077	1e-127	99.6
G2664	SSU	G2664__RIB_26127	Ascomycota	Sordariomycetes	Hypocreales	ABDF02000071	9e-129	100
G2664	SSU	G2664__RIB_26136	Ascomycota	Eurotiomycetes		KC337077	2e-86	100
G2664	SSU	G2664__RIB_26141	Basidiomycota	Agaricomycetes	Russulales	AY293156	2e-140	99.28
G2664	SSU	G2664__RIB_26155	Ascomycota	Sordariomycetes	Hypocreales	AJ301966	5e-96	99.48
G2664	SSU	G2664__RIB_26165	Ascomycota	Eurotiomycetes	Eurotiales	KF758801	1e-127	99.6
G2664	SSU	G2664__RIB_26174	Ascomycota	Eurotiomycetes	Eurotiales	EU136028	2e-116	99.57
G2664	SSU	G2664__RIB_26192	Ascomycota	Eurotiomycetes	Eurotiales	JN397370	6e-71	100
G2664	SSU	G2664__RIB_26194	Ascomycota	Eurotiomycetes	Eurotiales	KF776917	2e-129	100
G2664	SSU	G2664__RIB_26221	Ascomycota	Eurotiomycetes		KC337077	2e-155	99.67
G2664	SSU	G2664__RIB_26225	Ascomycota	Eurotiomycetes	Eurotiales	ABAS01000104	2e-121	99.58
G2664	SSU	G2664__RIB_26230	Ascomycota	Eurotiomycetes	Eurotiales	AOTG01000575	1e-127	99.6
G2664	SSU	G2664__RIB_26252	Ascomycota	Eurotiomycetes	Eurotiales	JN397370	3e-119	99.58
G2664	SSU	G2664__RIB_26254	Ascomycota	Eurotiomycetes	Eurotiales	GU573850	7e-75	99.36
G2664	SSU	G2664__RIB_26260	Basidiomycota	Agaricomycetes	Russulales	AY707093	1e-107	99.08
G2664	SSU	G2664__RIB_26265	Ascomycota	Eurotiomycetes		KC337077	2e-129	100
G2664	SSU	G2664__RIB_26301	Ascomycota	Eurotiomycetes	Eurotiales	KF152942	0	99.77
G2664	SSU	G2664__RIB_26307	Ascomycota	Eurotiomycetes	Eurotiales	JN397370	2e-171	100
G2664	SSU	G2664__RIB_26325	Basidiomycota	Agaricomycetes	Russulales	U59093	1e-77	99.38
G2664	SSU	G2664__RIB_26377	Ascomycota	Eurotiomycetes		KC337077	2e-129	100
G2664	SSU	G2664__RIB_26384	Basidiomycota	Agaricomycetes	Agaricales	AY771605	1e-87	98.9
G2664	SSU	G2664__RIB_26418	Ascomycota	Eurotiomycetes		KC337077	2e-129	100
G2664	SSU	G2664__RIB_26419	Mucoromycota	Mucoromycetes	Endogonales	EF023703	1e-110	93.14
G2664	SSU	G2664__RIB_26464	Ascomycota	Eurotiomycetes	Eurotiales	KF849480	2e-129	100
G2664	SSU	G2664__RIB_26475	Ascomycota	Eurotiomycetes	Eurotiales	JN397370	7e-75	100
G2664	SSU	G2664__RIB_265	Ascomycota	Eurotiomycetes		KC337077	2e-129	100
G2664	SSU	G2664__RIB_26507	Ascomycota	Eurotiomycetes	Eurotiales	AF245270	1e-127	99.6
G2664	SSU	G2664__RIB_26511	Ascomycota	Eurotiomycetes	Eurotiales	GU733351	1e-127	99.6
G2664	SSU	G2664__RIB_26526	Ascomycota	Eurotiomycetes	Eurotiales	JN397370	9e-109	95.9
G2664	SSU	G2664__RIB_26533	Ascomycota	Fungi other	Eurotiales	GU573850	4e-60	99.23
G2664	SSU	G2664__RIB_26538	Ascomycota	Eurotiomycetes	Eurotiales	JN397370	4e-127	99.6
G2664	SSU	G2664__RIB_26574	Ascomycota	Eurotiomycetes	Eurotiales	KF758801	0	99.78
G2664	SSU	G2664__RIB_2661	Ascomycota	Eurotiomycetes	Eurotiales	AB008406	0	99.38
G2664	SSU	G2664__RIB_26642	Ascomycota	Sordariomycetes	Hypocreales	ABDF02000071	5e-126	99.2
G2664	SSU	G2664__RIB_26660	Ascomycota	Eurotiomycetes	Eurotiales	GU825367	1e-127	99.6
G2664	SSU	G2664__RIB_26665	Ascomycota	Eurotiomycetes	Eurotiales	JN397370	1e-127	99.6
G2664	SSU	G2664__RIB_26666	Ascomycota	Eurotiomycetes	Eurotiales	KF758801	1e-126	99.6
G2664	SSU	G2664__RIB_26684	Basidiomycota	Agaricomycetes	Russulales	AY293156	0	98.45
G2664	SSU	G2664__RIB_2675	Basidiomycota	Agaricomycetes		DQ092920	5e-108	99.54
G2664	SSU	G2664__RIB_26766	Ascomycota	Eurotiomycetes	Eurotiales	KF152942	5e-121	98.01
G2664	SSU	G2664__RIB_26771	Ascomycota	Eurotiomycetes		KC337077	2e-160	100
G2664	SSU	G2664__RIB_26784	Ascomycota	Eurotiomycetes	Eurotiales	KF152942	3e-151	99.66
G2664	SSU	G2664__RIB_26797	Basidiomycota	Agaricomycetes	Russulales	AY293156	0	99.46
G2664	SSU	G2664__RIB_26804	Ascomycota	Eurotiomycetes	Eurotiales	GU823984	2e-129	100
G2664	SSU	G2664__RIB_26806	Ascomycota	Dothideomycetes	Capnodiales	KC674593	5e-106	99.53
G2664	SSU	G2664__RIB_2682	Ascomycota	Eurotiomycetes	Eurotiales	M83260	0	99.76
G2664	SSU	G2664__RIB_26856	Ascomycota	Eurotiomycetes	Eurotiales	JN397370	0	100
G2664	SSU	G2664__RIB_26879	Basidiomycota	Agaricomycetes	Russulales	U59093	9e-129	100
G2664	SSU	G2664__RIB_2688	Ascomycota	Eurotiomycetes		KC337077	0	99.77
G2664	SSU	G2664__RIB_2689	Ascomycota	Sordariomycetes	Hypocreales	HQ191353	7e-86	95.54
G2664	SSU	G2664__RIB_26913	Ascomycota	Eurotiomycetes	Eurotiales	KF758801	7e-75	100
G2664	SSU	G2664__RIB_26971	Ascomycota	Fungi other		KC337077	2e-56	100
G2664	SSU	G2664__RIB_26986	Ascomycota	Eurotiomycetes		KC337077	2e-125	99.2
G2664	SSU	G2664__RIB_27003	Ascomycota	Eurotiomycetes	Eurotiales	M83260	0	99.76
G2664	SSU	G2664__RIB_27061	Ascomycota	Eurotiomycetes	Eurotiales	KC962231	1e-127	99.6
G2664	SSU	G2664__RIB_27083	Ascomycota	Eurotiomycetes	Eurotiales	FJ716250	9e-129	100
G2664	SSU	G2664__RIB_27173	Ascomycota	Eurotiomycetes	Eurotiales	U77377	2e-72	96.41
G2664	SSU	G2664__RIB_27183	Ascomycota	Eurotiomycetes	Eurotiales	KF758801	1e-127	99.6
G2664	SSU	G2664__RIB_27193	Ascomycota	Eurotiomycetes	Eurotiales	M60300	1e-127	99.6
G2664	SSU	G2664__RIB_27227	Ascomycota	Eurotiomycetes		KC337077	4e-127	99.6
G2664	SSU	G2664__RIB_27257	Basidiomycota	Agaricomycetes	Agaricales	KF291252	6e-146	98.63
G2664	SSU	G2664__RIB_27258	Ascomycota	Eurotiomycetes	Eurotiales	U77377	7e-71	95.81
G2664	SSU	G2664__RIB_27263	Basidiomycota	Fungi other	Russulales	U59060	9e-59	98.46
G2664	SSU	G2664__RIB_27306	Basidiomycota	Agaricomycetes	Russulales	AY707093	1e-117	99.15
G2664	SSU	G2664__RIB_27355	Ascomycota	Eurotiomycetes	Eurotiales	KF758801	0	99.79
G2664	SSU	G2664__RIB_27365	Ascomycota	Eurotiomycetes	Eurotiales	KF758801	4e-127	99.6
G2664	SSU	G2664__RIB_27379	Ascomycota	Eurotiomycetes		EU620161	4e-122	98.79
G2664	SSU	G2664__RIB_27382	Ascomycota	Eurotiomycetes		KC337077	2e-129	100
G2664	SSU	G2664__RIB_27404	Ascomycota	Eurotiomycetes	Eurotiales	KF776917	1e-127	99.6
G2664	SSU	G2664__RIB_27420	Ascomycota	Dothideomycetes	Capnodiales	GU214590	2e-124	98.8
G2664	SSU	G2664__RIB_27495	Ascomycota	Eurotiomycetes	Eurotiales	KF758801	9e-119	97.6
G2664	SSU	G2664__RIB_27501	Basidiomycota	Agaricomycetes		KC673286	4e-97	100
G2664	SSU	G2664__RIB_27529	Basidiomycota	Agaricomycetes	Russulales	U59093	1e-127	99.6
G2664	SSU	G2664__RIB_27530	Ascomycota	Eurotiomycetes		KC337077	3e-113	100
G2664	SSU	G2664__RIB_27539	Ascomycota	Eurotiomycetes	Eurotiales	AF245266	1e-127	99.6
G2664	SSU	G2664__RIB_27549	Ascomycota	Eurotiomycetes		KC337077	2e-129	100
G2664	SSU	G2664__RIB_27594	Ascomycota	Eurotiomycetes	Eurotiales	KF758801	0	99.8
G2664	SSU	G2664__RIB_2760	Ascomycota	Sordariomycetes	Hypocreales	GU823680	9e-129	100
G2664	SSU	G2664__RIB_27619	Basidiomycota	Agaricomycetes	Russulales	AY707093	0	99.32
G2664	SSU	G2664__RIB_27669	Ascomycota	Eurotiomycetes	Eurotiales	FR774046	3e-128	99.6
G2664	SSU	G2664__RIB_27695	Ascomycota	Eurotiomycetes	Eurotiales	JN397370	2e-129	100
G2664	SSU	G2664__RIB_27726	Ascomycota	Eurotiomycetes	Eurotiales	FJ545752	1e-122	98.41
G2664	SSU	G2664__RIB_27730	Ascomycota	Eurotiomycetes	Eurotiales	KF152942	2e-152	99.01
G2664	SSU	G2664__RIB_27737	Ascomycota	Eurotiomycetes		KC337077	2e-95	100
G2664	SSU	G2664__RIB_27752	Ascomycota	Eurotiomycetes	Eurotiales	EU136028	6e-167	99.69
G2664	SSU	G2664__RIB_27766	Ascomycota	Eurotiomycetes	Eurotiales	JN397370	1e-127	99.6
G2664	SSU	G2664__RIB_27834	Ascomycota	Eurotiomycetes	Eurotiales	GU824070	2e-129	100
G2664	SSU	G2664__RIB_27839	Basidiomycota	Agaricomycetes	Russulales	AY293156	0	98.77
G2664	SSU	G2664__RIB_27856	Ascomycota	Eurotiomycetes	Eurotiales	JN397370	1e-127	99.6
G2664	SSU	G2664__RIB_27880	Ascomycota	Eurotiomycetes	Eurotiales	GU824070	2e-129	100
G2664	SSU	G2664__RIB_27893	Ascomycota	Eurotiomycetes		KC337077	9e-119	100
G2664	SSU	G2664__RIB_27899	Ascomycota	Eurotiomycetes	Eurotiales	AB245443	0	99.74
G2664	SSU	G2664__RIB_2791	Ascomycota	Leotiomycetes		GQ154631	3e-124	97.34
G2664	SSU	G2664__RIB_27922	Ascomycota	Eurotiomycetes	Eurotiales	GU825333	1e-132	98.51
G2664	SSU	G2664__RIB_27940	Basidiomycota	Wallemiomycetes	Geminibasidiales	JX242894	0	99.72
G2664	SSU	G2664__RIB_27976	Basidiomycota	Agaricomycetes	Gomphales	AY752968	5e-126	99.2
G2664	SSU	G2664__RIB_28010	Ascomycota	Eurotiomycetes	Eurotiales	AAKD03000141	0	99.72
G2664	SSU	G2664__RIB_28039	Ascomycota	Eurotiomycetes	Eurotiales	JN397370	2e-129	100
G2664	SSU	G2664__RIB_28041	Basidiomycota	Fungi other	Russulales	U59093	2e-50	99.11
G2664	SSU	G2664__RIB_28049	Basidiomycota	Agaricomycetes	Russulales	AY293156	0	99.38
G2664	SSU	G2664__RIB_28167	Ascomycota	Eurotiomycetes	Eurotiales	KF152942	0	99.51
G2664	SSU	G2664__RIB_28169	Ascomycota	Eurotiomycetes	Eurotiales	KF758801	1e-127	99.6
G2664	SSU	G2664__RIB_2817	Basidiomycota	Fungi other		AF518581	4e-174	90.58
G2664	SSU	G2664__RIB_28200	Ascomycota	Eurotiomycetes	Chaetothyriales	Y11714	3e-156	99.67
G2664	SSU	G2664__RIB_28249	Chytridiomycota	Chytridiomycetes		KC670541	1e-127	99.6
G2664	SSU	G2664__RIB_28252	Ascomycota	Dothideomycetes	Pleosporales	KC670862	0	99.56
G2664	SSU	G2664__RIB_2826	Ascomycota	Eurotiomycetes	Eurotiales	JX396260	1e-126	99.6
G2664	SSU	G2664__RIB_28304	Basidiomycota	Agaricomycetes		DQ511033	5e-126	99.2
G2664	SSU	G2664__RIB_28305	Ascomycota	Eurotiomycetes	Eurotiales	M60300	1e-177	99.71
G2664	SSU	G2664__RIB_28311	Ascomycota	Eurotiomycetes	Chaetothyriales	EU090194	1e-127	99.6
G2664	SSU	G2664__RIB_28322	Ascomycota	Fungi other	Eurotiales	FJ947527	9e-69	99.31
G2664	SSU	G2664__RIB_28324	Ascomycota	Eurotiomycetes		KF768889	1e-116	98.33
G2664	SSU	G2664__RIB_28366	Basidiomycota	Agaricomycetes	Russulales	U59093	0	99.17
G2664	SSU	G2664__RIB_28386	Ascomycota	Eurotiomycetes	Eurotiales	U77377	1e-127	99.6
G2664	SSU	G2664__RIB_28412	Ascomycota	Eurotiomycetes	Eurotiales	KC962231	0	99.78
G2664	SSU	G2664__RIB_28422	Ascomycota	Eurotiomycetes	Eurotiales	KF758801	0	99.52
G2664	SSU	G2664__RIB_28473	Ascomycota	Eurotiomycetes	Eurotiales	AM270052	3e-101	99.03
G2664	SSU	G2664__RIB_2855	Ascomycota	Sordariomycetes	Hypocreales	HQ232191	1e-127	99.6
G2664	SSU	G2664__RIB_28558	Ascomycota	Sordariomycetes	Hypocreales	X69852	6e-107	99.08
G2664	SSU	G2664__RIB_28559	Ascomycota	Eurotiomycetes	Eurotiales	JN397370	3e-123	98.8
G2664	SSU	G2664__RIB_28580	Basidiomycota	Agaricomycetes	Russulales	DQ457626	4e-169	98.81
G2664	SSU	G2664__RIB_28601	Ascomycota	Eurotiomycetes		KC337077	1e-127	99.6
G2664	SSU	G2664__RIB_28650	Ascomycota	Eurotiomycetes		KC337077	4e-127	99.6
G2664	SSU	G2664__RIB_28679	Ascomycota	Eurotiomycetes	Eurotiales	AAJN01000138	1e-107	99.54
G2664	SSU	G2664__RIB_28696	Ascomycota	Eurotiomycetes	Eurotiales	M83260	2e-125	99.2
G2664	SSU	G2664__RIB_28706	Ascomycota	Fungi other		KC337077	2e-60	100
G2664	SSU	G2664__RIB_28730	Ascomycota	Eurotiomycetes	Eurotiales	KF758801	4e-127	99.6
G2664	SSU	G2664__RIB_28758	Ascomycota	Eurotiomycetes	Eurotiales	JN397370	2e-129	100
G2664	SSU	G2664__RIB_28765	Basidiomycota	Agaricomycetes		AY382472	8e-160	99.68
G2664	SSU	G2664__RIB_2884	Ascomycota	Eurotiomycetes	Eurotiales	GU823984	2e-119	97.61
G2664	SSU	G2664__RIB_28842	Ascomycota	Eurotiomycetes		KC337077	0	98.44
G2664	SSU	G2664__RIB_28890	Ascomycota	Eurotiomycetes	Eurotiales	AY526487	0	99.72
G2664	SSU	G2664__RIB_28902	Ascomycota	Eurotiomycetes	Eurotiales	EU136028	6e-158	98.73
G2664	SSU	G2664__RIB_28913	Ascomycota	Fungi other		GQ154631	3e-69	99.32
G2664	SSU	G2664__RIB_28933	Basidiomycota	Fungi other		KC673393	6e-56	99.18
G2664	SSU	G2664__RIB_28956	Ascomycota	Eurotiomycetes		KC337077	9e-129	100
G2664	SSU	G2664__RIB_2898	Basidiomycota	Agaricomycetes	Russulales	AY293156	0	99.49
G2664	SSU	G2664__RIB_29009	Ascomycota	Eurotiomycetes	Eurotiales	KF152942	0	99.77
G2664	SSU	G2664__RIB_29042	Ascomycota	Fungi other	Eurotiales	JN397370	7e-65	100
G2664	SSU	G2664__RIB_29094	Ascomycota	Eurotiomycetes		KC337077	4e-127	99.6
G2664	SSU	G2664__RIB_291	Ascomycota	Fungi other	Pleosporales	KC670842	1e-67	100
G2664	SSU	G2664__RIB_29103	Basidiomycota	Agaricomycetes		AY382472	9e-84	99.42
G2664	SSU	G2664__RIB_29107	Basidiomycota	Agaricomycetes		DQ511816	2e-100	99.51
G2664	SSU	G2664__RIB_29115	Ascomycota	Fungi other	Eurotiales	AF245255	4e-65	99.28
G2664	SSU	G2664__RIB_29142	Basidiomycota	Agaricomycetes	Russulales	AY293156	0	97.94
G2664	SSU	G2664__RIB_2917	Basidiomycota	Agaricomycetes		KJ417175	3e-128	99.6
G2664	SSU	G2664__RIB_29205	Ascomycota	Eurotiomycetes	Eurotiales	KF758801	5e-126	99.2
G2664	SSU	G2664__RIB_2922	Ascomycota	Eurotiomycetes	Eurotiales	AB032070	1e-127	99.6
G2664	SSU	G2664__RIB_29225	Ascomycota	Eurotiomycetes	Eurotiales	EU136028	6e-71	98.08
G2664	SSU	G2664__RIB_29251	Ascomycota	Eurotiomycetes	Eurotiales	GU823984	1e-127	99.6
G2664	SSU	G2664__RIB_29302	Ascomycota	Eurotiomycetes	Eurotiales	EU136028	4e-82	99.41
G2664	SSU	G2664__RIB_29304	Basidiomycota	Agaricomycetes	Russulales	DQ457626	4e-155	97.81
G2664	SSU	G2664__RIB_29317	Ascomycota	Eurotiomycetes	Eurotiales	JQ693067	0	99.78
G2664	SSU	G2664__RIB_29323	Ascomycota	Eurotiomycetes	Eurotiales	KF758801	7e-75	100
G2664	SSU	G2664__RIB_29334	Basidiomycota	Agaricomycetes	Russulales	AY707093	0	98.78
G2664	SSU	G2664__RIB_29341	Ascomycota	Dothideomycetes	Pleosporales	KC674552	5e-111	99.55
G2664	SSU	G2664__RIB_29343	Ascomycota	Sordariomycetes	Sordariales	AB278186	4e-129	97.11
G2664	SSU	G2664__RIB_29357	Ascomycota	Eurotiomycetes		KC337077	9e-129	100
G2664	SSU	G2664__RIB_29369	Ascomycota	Eurotiomycetes	Eurotiales	KF152942	0	99.3
G2664	SSU	G2664__RIB_29447	Ascomycota	Eurotiomycetes	Eurotiales	JX396260	1e-127	99.6
G2664	SSU	G2664__RIB_29448	Ascomycota	Eurotiomycetes	Eurotiales	GU568129	1e-92	100
G2664	SSU	G2664__RIB_29480	Ascomycota	Eurotiomycetes	Eurotiales	U77377	2e-85	100
G2664	SSU	G2664__RIB_29524	Ascomycota	Sordariomycetes	Hypocreales	ABDF02000071	3e-108	100
G2664	SSU	G2664__RIB_2955	Ascomycota	Eurotiomycetes		KC337077	1e-127	100
G2664	SSU	G2664__RIB_29560	Ascomycota	Eurotiomycetes	Eurotiales	JN397370	4e-122	100
G2664	SSU	G2664__RIB_29565	Ascomycota	Sordariomycetes	Hypocreales	ABDG02000018	2e-124	98.8
G2664	SSU	G2664__RIB_29586	Ascomycota	Eurotiomycetes	Eurotiales	KF152942	0	99.76
G2664	SSU	G2664__RIB_29592	Ascomycota	Eurotiomycetes		KC337077	0	100
G2664	SSU	G2664__RIB_29612	Ascomycota	Eurotiomycetes		KC337077	9e-129	100
G2664	SSU	G2664__RIB_29618	Ascomycota	Eurotiomycetes	Eurotiales	KC670680	2e-120	99.58
G2664	SSU	G2664__RIB_29626	Basidiomycota	Agaricomycetes	Russulales	AEOJ01000011	3e-83	97.78
G2664	SSU	G2664__RIB_29630	Ascomycota	Eurotiomycetes	Eurotiales	GU823984	2e-134	99.62
G2664	SSU	G2664__RIB_29644	Ascomycota	Dothideomycetes	Botryosphaeriales	U42477	2e-135	100
G2664	SSU	G2664__RIB_29658	Ascomycota	Eurotiomycetes		KC337077	3e-128	100
G2664	SSU	G2664__RIB_29666	Ascomycota	Eurotiomycetes		KC337077	1e-147	100
G2664	SSU	G2664__RIB_29706	Ascomycota	Eurotiomycetes	Eurotiales	EU136028	4e-129	99.61
G2664	SSU	G2664__RIB_29723	Ascomycota	Eurotiomycetes	Eurotiales	AB032070	0	99.79
G2664	SSU	G2664__RIB_2973	Ascomycota	Eurotiomycetes		KC337077	2e-120	99.58
G2664	SSU	G2664__RIB_29745	Glomeromycota	Glomeromycetes	Diversisporales	KC708363	7e-50	100
G2664	SSU	G2664__RIB_29747	Ascomycota	Eurotiomycetes	Eurotiales	JN397370	0	100
G2664	SSU	G2664__RIB_29773	Basidiomycota	Wallemiomycetes	Geminibasidiales	JX242894	4e-127	99.6
G2664	SSU	G2664__RIB_29787	Ascomycota	Eurotiomycetes	Eurotiales	EU136028	2e-125	99.6
G2664	SSU	G2664__RIB_29799	Basidiomycota	Agaricomycetes	Agaricales	AF076381	7e-70	99.32
G2664	SSU	G2664__RIB_29852	Basidiomycota	Agaricomycetes	Russulales	U59093	1e-162	99.37
G2664	SSU	G2664__RIB_29906	Ascomycota	Eurotiomycetes	Eurotiales	M83260	0	99.76
G2664	SSU	G2664__RIB_2995	Ascomycota	Eurotiomycetes	Eurotiales	KF758801	1e-87	100
G2664	SSU	G2664__RIB_29982	Ascomycota	Eurotiomycetes	Eurotiales	JN397370	5e-126	99.2
G2664	SSU	G2664__RIB_30000	Basidiomycota	Agaricomycetes	Russulales	AY293156	2e-124	98.8
G2664	SSU	G2664__RIB_30038	Ascomycota	Eurotiomycetes	Eurotiales	KF152942	2e-104	95.04
G2664	SSU	G2664__RIB_30079	Ascomycota	Eurotiomycetes	Eurotiales	JN397370	1e-127	99.6
G2664	SSU	G2664__RIB_30102	Basidiomycota	Agaricomycetes	Russulales	DQ457626	5e-91	99.46
G2664	SSU	G2664__RIB_30115	Ascomycota	Eurotiomycetes	Eurotiales	JN397370	1e-127	99.6
G2664	SSU	G2664__RIB_3012	Ascomycota	Eurotiomycetes	Eurotiales	GQ458038	2e-104	96.15
G2664	SSU	G2664__RIB_30136	Ascomycota	Fungi other		JF836023	0	94.25
G2664	SSU	G2664__RIB_30138	Ascomycota	Eurotiomycetes		KC337077	2e-129	100
G2664	SSU	G2664__RIB_30140	Ascomycota	Eurotiomycetes		KC337077	2e-115	100
G2664	SSU	G2664__RIB_30143	Ascomycota	Eurotiomycetes	Eurotiales	KF758801	1e-127	99.6
G2664	SSU	G2664__RIB_30145	Ascomycota	Eurotiomycetes		KC337077	2e-129	100
G2664	SSU	G2664__RIB_30161	Ascomycota	Eurotiomycetes		KC337077	2e-129	100
G2664	SSU	G2664__RIB_30178	Basidiomycota	Fungi other	Boletales	AEQB01000388	2e-60	99.23
G2664	SSU	G2664__RIB_30188	Ascomycota	Eurotiomycetes	Eurotiales	JN397370	2e-129	100
G2664	SSU	G2664__RIB_3019	Ascomycota	Eurotiomycetes	Eurotiales	JQ693067	0	99.12
G2664	SSU	G2664__RIB_30215	Ascomycota	Eurotiomycetes		KC337077	0	100
G2664	SSU	G2664__RIB_30219	Basidiomycota	Agaricomycetes	Russulales	AY293156	1e-126	99.6
G2664	SSU	G2664__RIB_3023	Ascomycota	Eurotiomycetes		KC337077	5e-116	98.33
G2664	SSU	G2664__RIB_30249	Basidiomycota	Agaricomycetes	Russulales	AY707093	5e-126	99.2
G2664	SSU	G2664__RIB_30256	Ascomycota	Eurotiomycetes	Eurotiales	GQ120164	7e-115	98.72
G2664	SSU	G2664__RIB_30261	Ascomycota	Eurotiomycetes	Eurotiales	FJ430768	1e-127	99.6
G2664	SSU	G2664__RIB_30271	Ascomycota	Eurotiomycetes	Eurotiales	AB032070	2e-109	95.22
G2664	SSU	G2664__RIB_30278	Ascomycota	Sordariomycetes	Hypocreales	JQ837837	3e-108	100
G2664	SSU	G2664__RIB_30285	Ascomycota	Eurotiomycetes		KC337077	2e-129	100
G2664	SSU	G2664__RIB_30315	Ascomycota	Eurotiomycetes	Eurotiales	AF245255	2e-95	99.48
G2664	SSU	G2664__RIB_30366	Ascomycota	Eurotiomycetes		KC337077	2e-129	100
G2664	SSU	G2664__RIB_30407	Ascomycota	Eurotiomycetes	Eurotiales	KF758801	0	99.75
G2664	SSU	G2664__RIB_30551	Basidiomycota	Agaricomycetes	Russulales	DQ457626	0	98.36
G2664	SSU	G2664__RIB_3057	Ascomycota	Eurotiomycetes		KC337077	0	100
G2664	SSU	G2664__RIB_30574	Basidiomycota	Agaricomycetes	Gomphales	AY707095	4e-87	96
G2664	SSU	G2664__RIB_30635	Basidiomycota	Agaricomycetes	Hymenochaetales	U59064	2e-119	97.62
G2664	SSU	G2664__RIB_30636	Basidiomycota	Agaricomycetes	Cantharellales	AFRT01001168	2e-90	98.42
G2664	SSU	G2664__RIB_3064	Ascomycota	Fungi other		KC337077	2e-60	100
G2664	SSU	G2664__RIB_30653	Ascomycota	Eurotiomycetes	Eurotiales	GU824070	0	100
G2664	SSU	G2664__RIB_30672	Ascomycota	Eurotiomycetes	Eurotiales	KF758801	0	98.96
G2664	SSU	G2664__RIB_30681	Basidiomycota	Agaricomycetes		KC673286	2e-75	100
G2664	SSU	G2664__RIB_30693	Ascomycota	Eurotiomycetes	Eurotiales	GU733351	4e-127	99.6
G2664	SSU	G2664__RIB_30711	Ascomycota	Eurotiomycetes		KC337077	2e-129	100
G2664	SSU	G2664__RIB_30725	Basidiomycota	Agaricomycetes	Russulales	AY293156	0	99.78
G2664	SSU	G2664__RIB_30728	Ascomycota	Eurotiomycetes		KC337077	1e-127	99.6
G2664	SSU	G2664__RIB_30743	Ascomycota	Eurotiomycetes	Eurotiales	KF758801	5e-126	99.6
G2664	SSU	G2664__RIB_30758	Ascomycota	Eurotiomycetes	Eurotiales	JN397370	1e-127	99.6
G2664	SSU	G2664__RIB_30782	Ascomycota	Eurotiomycetes	Eurotiales	KF758801	0	99.23
G2664	SSU	G2664__RIB_30784	Ascomycota	Eurotiomycetes		KC337077	2e-129	100
G2664	SSU	G2664__RIB_30805	Ascomycota	Eurotiomycetes	Eurotiales	KF849480	2e-129	100
G2664	SSU	G2664__RIB_30806	Basidiomycota	Agaricomycetes		DQ511033	1e-126	99.6
G2664	SSU	G2664__RIB_30810	Ascomycota	Eurotiomycetes	Eurotiales	AB032070	1e-127	99.6
G2664	SSU	G2664__RIB_30814	Ascomycota	Sordariomycetes	Hypocreales	ABDF02000071	2e-129	100
G2664	SSU	G2664__RIB_30817	Glomeromycota	Glomeromycetes	Glomerales	JF414192	2e-55	99.17
G2664	SSU	G2664__RIB_3082	Basidiomycota	Agaricomycetes	Cantharellales	AY757262	5e-101	99.51
G2664	SSU	G2664__RIB_30830	Ascomycota	Eurotiomycetes	Eurotiales	GU733351	4e-127	99.6
G2664	SSU	G2664__RIB_30849	Ascomycota	Eurotiomycetes	Eurotiales	GU825722	4e-153	99.66
G2664	SSU	G2664__RIB_30941	Ascomycota	Sordariomycetes		JQ437439	1e-153	99.34
G2664	SSU	G2664__RIB_30951	Ascomycota	Eurotiomycetes	Eurotiales	AY526487	0	99.72
G2664	SSU	G2664__RIB_30968	Basidiomycota	Agaricomycetes		AY382472	2e-80	99.4
G2664	SSU	G2664__RIB_30969	Ascomycota	Eurotiomycetes	Eurotiales	JN397370	0	99.77
G2664	SSU	G2664__RIB_3097	Ascomycota	Eurotiomycetes		KC337077	0	100
G2664	SSU	G2664__RIB_31006	Ascomycota	Eurotiomycetes	Eurotiales	KF758801	1e-122	98.41
G2664	SSU	G2664__RIB_31010	Basidiomycota	Agaricomycetes		DQ511624	5e-126	99.2
G2664	SSU	G2664__RIB_31037	Ascomycota	Eurotiomycetes	Eurotiales	KF776917	0	99.75
G2664	SSU	G2664__RIB_3106	Ascomycota	Eurotiomycetes	Eurotiales	AORT01023440	2e-86	97.85
G2664	SSU	G2664__RIB_31061	Ascomycota	Eurotiomycetes	Eurotiales	JX396260	1e-127	99.6
G2664	SSU	G2664__RIB_31077	Ascomycota	Eurotiomycetes		KC337077	2e-129	100
G2664	SSU	G2664__RIB_3108	Basidiomycota	Agaricomycetes		EF024197	5e-123	99.19
G2664	SSU	G2664__RIB_31115	Ascomycota	Eurotiomycetes	Eurotiales	JN397370	2e-129	100
G2664	SSU	G2664__RIB_31129	Ascomycota	Eurotiomycetes	Eurotiales	KF758801	1e-127	99.6
G2664	SSU	G2664__RIB_31154	Ascomycota	Sordariomycetes	Hypocreales	ANBJ01000199	3e-171	99.7
G2664	SSU	G2664__RIB_31169	Ascomycota	Eurotiomycetes	Eurotiales	GQ903337	9e-89	100
G2664	SSU	G2664__RIB_31180	Ascomycota	Fungi other		FR774045	3e-93	91.6
G2664	SSU	G2664__RIB_31194	Ascomycota	Eurotiomycetes	Eurotiales	GU825367	2e-129	100
G2664	SSU	G2664__RIB_31198	Ascomycota	Eurotiomycetes	Eurotiales	FJ947527	1e-152	99.66
G2664	SSU	G2664__RIB_31207	Basidiomycota	Agaricomycetes	Russulales	U59093	1e-82	98.84
G2664	SSU	G2664__RIB_31211	Ascomycota	Eurotiomycetes	Eurotiales	KC842215	2e-166	99.69
G2664	SSU	G2664__RIB_31237	Ascomycota	Fungi other		AB245443	2e-56	94.44
G2664	SSU	G2664__RIB_31279	Ascomycota	Eurotiomycetes	Eurotiales	GU733351	5e-126	99.2
G2664	SSU	G2664__RIB_31289	Ascomycota	Eurotiomycetes		KC337077	0	99.77
G2664	SSU	G2664__RIB_31308	Ascomycota	Eurotiomycetes	Eurotiales	JN397370	1e-126	100
G2664	SSU	G2664__RIB_3134	Basidiomycota	Agaricomycetes	Boletales	DQ534688	7e-100	99.02
G2664	SSU	G2664__RIB_31358	Basidiomycota	Agaricomycetes		JN940333	1e-127	99.6
G2664	SSU	G2664__RIB_31374	Basidiomycota	Agaricomycetes	Russulales	AY707093	0	99.27
G2664	SSU	G2664__RIB_31385	Ascomycota	Eurotiomycetes	Eurotiales	KF758801	2e-129	100
G2664	SSU	G2664__RIB_31391	Ascomycota	Eurotiomycetes	Eurotiales	FJ545752	1e-127	99.6
G2664	SSU	G2664__RIB_31456	Ascomycota	Eurotiomycetes	Eurotiales	KC670680	1e-127	99.6
G2664	SSU	G2664__RIB_31473	Ascomycota	Eurotiomycetes	Eurotiales	JN397370	1e-127	99.6
G2664	SSU	G2664__RIB_31512	Ascomycota	Eurotiomycetes	Eurotiales	AORT01023440	0	99.57
G2664	SSU	G2664__RIB_31587	Basidiomycota	Agaricomycetes	Russulales	AY293156	2e-124	98.8
G2664	SSU	G2664__RIB_31593	Ascomycota	Eurotiomycetes		KC337077	1e-111	100
G2664	SSU	G2664__RIB_31607	Ascomycota	Eurotiomycetes	Eurotiales	JN397370	0	99.76
G2664	SSU	G2664__RIB_31610	Ascomycota	Eurotiomycetes	Eurotiales	GU824070	2e-129	100
G2664	SSU	G2664__RIB_31612	Ascomycota	Eurotiomycetes	Eurotiales	KF152942	0	99.78
G2664	SSU	G2664__RIB_31621	Ascomycota	Eurotiomycetes	Eurotiales	EF395944	1e-125	99.6
G2664	SSU	G2664__RIB_31635	Basidiomycota	Agaricomycetes	Agaricales	L36659	1e-97	98.52
G2664	SSU	G2664__RIB_31687	Ascomycota	Leotiomycetes	Helotiales	HM628675	7e-92	100
G2664	SSU	G2664__RIB_31713	Basidiomycota	Agaricomycetes	Russulales	AY293156	8e-170	99.39
G2664	SSU	G2664__RIB_31717	Ascomycota	Eurotiomycetes	Eurotiales	JN397370	1e-131	100
G2664	SSU	G2664__RIB_31718	Ascomycota	Eurotiomycetes	Eurotiales	JN397370	1e-127	99.6
G2664	SSU	G2664__RIB_31719	Basidiomycota	Agaricomycetes	Russulales	AY293156	5e-126	99.2
G2664	SSU	G2664__RIB_31728	Ascomycota	Eurotiomycetes	Eurotiales	AB032070	1e-127	99.6
G2664	SSU	G2664__RIB_31732	Ascomycota	Eurotiomycetes		KC337077	2e-129	100
G2664	SSU	G2664__RIB_31740	Ascomycota	Eurotiomycetes	Eurotiales	KF152942	0	98.56
G2664	SSU	G2664__RIB_31742	Ascomycota	Eurotiomycetes	Eurotiales	KF758801	0	99.79
G2664	SSU	G2664__RIB_31743	Ascomycota	Eurotiomycetes		KC337077	2e-129	100
G2664	SSU	G2664__RIB_31748	Ascomycota	Eurotiomycetes	Eurotiales	KF758801	0	99.79
G2664	SSU	G2664__RIB_31763	Ascomycota	Eurotiomycetes	Eurotiales	GU823984	1e-127	99.6
G2664	SSU	G2664__RIB_31780	Basidiomycota	Agaricomycetes		EF023860	0	98.97
G2664	SSU	G2664__RIB_31797	Ascomycota	Sordariomycetes	Hypocreales	ABDF02000071	2e-129	100
G2664	SSU	G2664__RIB_31829	Ascomycota	Eurotiomycetes		KC337077	2e-129	100
G2664	SSU	G2664__RIB_31847	Ascomycota	Eurotiomycetes	Eurotiales	KF152942	0	99.5
G2664	SSU	G2664__RIB_31861	Ascomycota	Eurotiomycetes	Eurotiales	HM188427	7e-110	97.05
G2664	SSU	G2664__RIB_31890	Ascomycota	Eurotiomycetes	Eurotiales	AAJN01000138	1e-102	99.52
G2664	SSU	G2664__RIB_31907	Ascomycota	Eurotiomycetes	Eurotiales	JX396260	1e-127	99.6
G2664	SSU	G2664__RIB_31978	Ascomycota	Eurotiomycetes	Eurotiales	JN397370	1e-127	99.6
G2664	SSU	G2664__RIB_32030	Ascomycota	Eurotiomycetes	Eurotiales	GU823984	1e-127	99.6
G2664	SSU	G2664__RIB_32036	Basidiomycota	Agaricomycetes	Agaricales	AF518591	1e-152	99.33
G2664	SSU	G2664__RIB_32060	Ascomycota	Eurotiomycetes		KC337077	1e-97	99.49
G2664	SSU	G2664__RIB_32083	Ascomycota	Eurotiomycetes	Eurotiales	JN397370	2e-129	100
G2664	SSU	G2664__RIB_32107	Ascomycota	Eurotiomycetes	Eurotiales	JN397370	1e-127	99.6
G2664	SSU	G2664__RIB_32130	Ascomycota	Eurotiomycetes	Eurotiales	AAKD03000144	7e-105	99.52
G2664	SSU	G2664__RIB_32163	Ascomycota	Eurotiomycetes	Eurotiales	KF758801	1e-127	99.6
G2664	SSU	G2664__RIB_32164	Basidiomycota	Wallemiomycetes	Geminibasidiales	JX242894	1e-127	99.6
G2664	SSU	G2664__RIB_32175	Ascomycota	Eurotiomycetes		KC337077	2e-129	100
G2664	SSU	G2664__RIB_32181	Ascomycota	Eurotiomycetes	Eurotiales	JN397370	1e-127	99.6
G2664	SSU	G2664__RIB_32232	Ascomycota	Sordariomycetes	Hypocreales	ABDF02000071	0	99.28
G2664	SSU	G2664__RIB_32257	Basidiomycota	Fungi other	Agaricales	AF076381	4e-65	98.59
G2664	SSU	G2664__RIB_32268	Ascomycota	Eurotiomycetes	Eurotiales	JN397370	7e-176	99.7
G2664	SSU	G2664__RIB_32269	Ascomycota	Eurotiomycetes	Eurotiales	KF849480	5e-142	96.42
G2664	SSU	G2664__RIB_32279	Ascomycota	Sordariomycetes		JN941689	9e-114	99.56
G2664	SSU	G2664__RIB_32308	Basidiomycota	Agaricomycetes	Gomphales	AF026637	0	99.76
G2664	SSU	G2664__RIB_32319	Ascomycota	Sordariomycetes	Hypocreales	AY261367	0	99.49
G2664	SSU	G2664__RIB_32325	Ascomycota	Eurotiomycetes	Eurotiales	KF152942	1e-127	99.6
G2664	SSU	G2664__RIB_32327	Ascomycota	Eurotiomycetes	Eurotiales	JF895928	0	99.32
G2664	SSU	G2664__RIB_32331	Ascomycota	Eurotiomycetes		KC337077	0	100
G2664	SSU	G2664__RIB_32357	Basidiomycota	Agaricomycetes	Russulales	DQ457626	9e-119	97.98
G2664	SSU	G2664__RIB_32359	Ascomycota	Fungi other		KF993708	2e-60	97.79
G2664	SSU	G2664__RIB_32441	Ascomycota	Archaeorhizomycetes		KF993708	0	95.53
G2664	SSU	G2664__RIB_32452	Ascomycota	Eurotiomycetes		KC337077	2e-129	100
G2664	SSU	G2664__RIB_32466	Ascomycota	Eurotiomycetes	Eurotiales	JN397370	9e-129	100
G2664	SSU	G2664__RIB_32481	Ascomycota	Eurotiomycetes	Eurotiales	KF758801	7e-125	99.2
G2664	SSU	G2664__RIB_32530	Ascomycota	Sordariomycetes	Xylariales	DQ471012	2e-120	98.01
G2664	SSU	G2664__RIB_32536	Ascomycota	Eurotiomycetes	Chaetothyriales	KC672693	2e-124	98.8
G2664	SSU	G2664__RIB_32538	Ascomycota	Eurotiomycetes	Eurotiales	AOTG01000575	0	99.75
G2664	SSU	G2664__RIB_3256	Ascomycota	Eurotiomycetes	Eurotiales	JN397370	8e-155	100
G2664	SSU	G2664__RIB_32561	Basidiomycota	Agaricomycetes		AY382472	1e-127	99.6
G2664	SSU	G2664__RIB_32582	Ascomycota	Eurotiomycetes	Eurotiales	FJ358354	0	98.9
G2664	SSU	G2664__RIB_32597	Ascomycota	Eurotiomycetes	Eurotiales	AAJN01000138	9e-109	99.54
G2664	SSU	G2664__RIB_32599	Ascomycota	Eurotiomycetes	Eurotiales	AY526487	1e-127	99.6
G2664	SSU	G2664__RIB_32633	Basidiomycota	Fungi other	Russulales	U59093	3e-68	99.31
G2664	SSU	G2664__RIB_32661	Ascomycota	Eurotiomycetes	Eurotiales	M83260	0	99.74
G2664	SSU	G2664__RIB_32680	Ascomycota	Fungi other	Eurotiales	EF395944	1e-50	99.12
G2664	SSU	G2664__RIB_32681	Ascomycota	Eurotiomycetes	Eurotiales	JN397370	1e-127	99.6
G2664	SSU	G2664__RIB_32735	Ascomycota	Sordariomycetes	Hypocreales	ABDF02000071	4e-127	99.6
G2664	SSU	G2664__RIB_3274	Ascomycota	Eurotiomycetes	Eurotiales	GU568129	2e-130	99.23
G2664	SSU	G2664__RIB_32740	Ascomycota	Fungi other		KC337077	6e-61	100
G2664	SSU	G2664__RIB_32741	Ascomycota	Eurotiomycetes	Eurotiales	AM270052	1e-168	99.39
G2664	SSU	G2664__RIB_32791	Basidiomycota	Agaricomycetes	Russulales	AEOJ01000011	6e-91	97.94
G2664	SSU	G2664__RIB_32837	Ascomycota	Eurotiomycetes	Eurotiales	JN397370	2e-129	100
G2664	SSU	G2664__RIB_32878	Basidiomycota	Agaricomycetes	Russulales	AY293156	2e-124	98.8
G2664	SSU	G2664__RIB_32907	Ascomycota	Eurotiomycetes		KC337077	1e-127	99.6
G2664	SSU	G2664__RIB_32912	Ascomycota	Eurotiomycetes	Eurotiales	EU136028	5e-121	99.58
G2664	SSU	G2664__RIB_32932	Basidiomycota	Agaricomycetes	Russulales	AY293156	0	98.67
G2664	SSU	G2664__RIB_32967	Ascomycota	Eurotiomycetes	Eurotiales	GU823984	1e-127	99.6
G2664	SSU	G2664__RIB_32996	Ascomycota	Sordariomycetes	Xylariales	AY315416	0	99.58
G2664	SSU	G2664__RIB_33008	Ascomycota	Eurotiomycetes		KC337077	2e-129	100
G2664	SSU	G2664__RIB_33092	Basidiomycota	Agaricomycetes	Russulales	DQ911615	7e-120	98.37
G2664	SSU	G2664__RIB_33100	Ascomycota	Eurotiomycetes	Eurotiales	KF152942	9e-99	99.5
G2664	SSU	G2664__RIB_33108	Ascomycota	Eurotiomycetes	Eurotiales	AOTG01000575	0	99.77
G2664	SSU	G2664__RIB_33112	Basidiomycota	Agaricomycetes		KC673286	2e-125	99.2
G2664	SSU	G2664__RIB_33119	Basidiomycota	Fungi other		KC672702	4e-62	100
G2664	SSU	G2664__RIB_3312	Entomophthoromycota	Entomophthoromycetes		EF219013	1e-112	96.03
G2664	SSU	G2664__RIB_33134	Ascomycota	Eurotiomycetes	Eurotiales	KF758801	1e-127	99.6
G2664	SSU	G2664__RIB_33181	Ascomycota	Sordariomycetes	Hypocreales	GU823680	0	99.78
G2664	SSU	G2664__RIB_33208	Ascomycota	Fungi other		ADWL01011213	3e-59	94.08
G2664	SSU	G2664__RIB_33229	Ascomycota	Eurotiomycetes	Eurotiales	KC670680	1e-111	96.34
G2664	SSU	G2664__RIB_33319	Basidiomycota	Fungi other	Russulales	U59093	2e-50	99.11
G2664	SSU	G2664__RIB_33333	Ascomycota	Eurotiomycetes	Eurotiales	KF758801	2e-104	100
G2664	SSU	G2664__RIB_33342	Ascomycota	Eurotiomycetes	Eurotiales	JN397370	8e-146	99.65
G2664	SSU	G2664__RIB_33378	Ascomycota	Eurotiomycetes	Eurotiales	KF152942	2e-120	98.77
G2664	SSU	G2664__RIB_33382	Ascomycota	Eurotiomycetes		KC337077	4e-122	99.59
G2664	SSU	G2664__RIB_33451	Ascomycota	Sordariomycetes	Hypocreales	KC987194	7e-90	99.46
G2664	SSU	G2664__RIB_33471	Ascomycota	Fungi other	Eurotiales	GU573850	6e-67	99.3
G2664	SSU	G2664__RIB_33485	Basidiomycota	Agaricomycetes	Russulales	U59093	6e-141	99.64
G2664	SSU	G2664__RIB_33511	Ascomycota	Eurotiomycetes	Eurotiales	JX396260	7e-115	97.92
G2664	SSU	G2664__RIB_33527	Ascomycota	Eurotiomycetes		KC337077	0	100
G2664	SSU	G2664__RIB_33567	Ascomycota	Eurotiomycetes	Eurotiales	FJ545752	4e-163	99.37
G2664	SSU	G2664__RIB_3359	Ascomycota	Eurotiomycetes	Eurotiales	JN397370	1e-122	98.41
G2664	SSU	G2664__RIB_33617	Ascomycota	Eurotiomycetes	Eurotiales	EU136028	4e-129	99.22
G2664	SSU	G2664__RIB_3365	Ascomycota	Eurotiomycetes		KC337077	2e-124	98.8
G2664	SSU	G2664__RIB_33651	Ascomycota	Eurotiomycetes	Eurotiales	AY256241	1e-127	99.6
G2664	SSU	G2664__RIB_33745	Basidiomycota	Agaricomycetes	Russulales	AY293156	9e-114	96.4
G2664	SSU	G2664__RIB_33764	Ascomycota	Eurotiomycetes	Eurotiales	D63698	3e-114	98.71
G2664	SSU	G2664__RIB_338	Ascomycota	Eurotiomycetes	Eurotiales	JN397370	1e-127	99.6
G2664	SSU	G2664__RIB_33806	Ascomycota	Eurotiomycetes	Eurotiales	GU824008	5e-126	99.2
G2664	SSU	G2664__RIB_3381	Basidiomycota	Agaricomycetes	Agaricales	KF471312	4e-164	97.91
G2664	SSU	G2664__RIB_33827	Ascomycota	Eurotiomycetes	Eurotiales	ABAS01000265	4e-102	100
G2664	SSU	G2664__RIB_3383	Ascomycota	Eurotiomycetes	Eurotiales	AB032070	1e-117	97.96
G2664	SSU	G2664__RIB_33843	Ascomycota	Eurotiomycetes	Chaetothyriales	EU541481	6e-118	96.51
G2664	SSU	G2664__RIB_33851	Ascomycota	Eurotiomycetes		KC337077	2e-129	100
G2664	SSU	G2664__RIB_33852	Ascomycota	Sordariomycetes	Trichosphaeriales	EF183485	1e-127	99.6
G2664	SSU	G2664__RIB_33859	Ascomycota	Eurotiomycetes	Eurotiales	KC842215	0	99.74
G2664	SSU	G2664__RIB_33860	Ascomycota	Sordariomycetes	Hypocreales	ABDF02000071	2e-129	100
G2664	SSU	G2664__RIB_33861	Ascomycota	Eurotiomycetes	Eurotiales	KF758801	1e-127	99.6
G2664	SSU	G2664__RIB_33907	Ascomycota	Eurotiomycetes	Eurotiales	JN397370	1e-177	99.71
G2664	SSU	G2664__RIB_33922	Basidiomycota	Agaricomycetes	Russulales	AY707093	0	99.49
G2664	SSU	G2664__RIB_33925	Ascomycota	Eurotiomycetes	Eurotiales	KF758801	2e-129	100
G2664	SSU	G2664__RIB_33943	Ascomycota	Leotiomycetes	Helotiales	EU940042	0	99.55
G2664	SSU	G2664__RIB_33970	Ascomycota	Eurotiomycetes		KC337077	5e-126	99.2
G2664	SSU	G2664__RIB_33987	Ascomycota	Eurotiomycetes		KC337077	9e-119	99.16
G2664	SSU	G2664__RIB_33998	Ascomycota	Sordariomycetes	Hypocreales	JN941704	3e-108	98.23
G2664	SSU	G2664__RIB_34004	Ascomycota	Eurotiomycetes		KC337077	2e-129	100
G2664	SSU	G2664__RIB_34023	Ascomycota	Eurotiomycetes	Eurotiales	KF758801	1e-127	99.6
G2664	SSU	G2664__RIB_34031	Ascomycota	Eurotiomycetes	Eurotiales	KF758801	0	97.04
G2664	SSU	G2664__RIB_34046	Basidiomycota	Wallemiomycetes	Geminibasidiales	JX242894	0	99.45
G2664	SSU	G2664__RIB_34056	Basidiomycota	Agaricomycetes		DQ511033	2e-124	98.8
G2664	SSU	G2664__RIB_34060	Ascomycota	Eurotiomycetes	Eurotiales	M83260	0	99.74
G2664	SSU	G2664__RIB_34074	Ascomycota	Sordariomycetes		EU863581	0	97.33
G2664	SSU	G2664__RIB_34077	Ascomycota	Eurotiomycetes	Eurotiales	JQ693067	0	99.74
G2664	SSU	G2664__RIB_34090	Ascomycota	Sordariomycetes	Hypocreales	ABDF02000071	0	99.77
G2664	SSU	G2664__RIB_34100	Basidiomycota	Agaricomycetes	Russulales	U59093	3e-108	99.54
G2664	SSU	G2664__RIB_34141	Ascomycota	Eurotiomycetes	Eurotiales	KF152942	0	98.48
G2664	SSU	G2664__RIB_34207	Basidiomycota	Fungi other		U59093	2e-105	94.74
G2664	SSU	G2664__RIB_34236	Ascomycota	Fungi other		KF758801	2e-104	94.05
G2664	SSU	G2664__RIB_34288	Ascomycota	Eurotiomycetes	Eurotiales	KF758801	0	99.23
G2664	SSU	G2664__RIB_34294	Ascomycota	Eurotiomycetes	Eurotiales	KF758801	0	99.43
G2664	SSU	G2664__RIB_34339	Ascomycota	Eurotiomycetes	Eurotiales	JN397370	4e-127	99.6
G2664	SSU	G2664__RIB_34351	Ascomycota	Eurotiomycetes	Eurotiales	AP007172	2e-85	99.43
G2664	SSU	G2664__RIB_34361	Ascomycota	Eurotiomycetes		KC337077	2e-129	100
G2664	SSU	G2664__RIB_3437	Ascomycota	Eurotiomycetes	Eurotiales	AB032070	2e-119	97.61
G2664	SSU	G2664__RIB_34374	Ascomycota	Eurotiomycetes	Eurotiales	KF758801	0	98.54
G2664	SSU	G2664__RIB_34376	Basidiomycota	Fungi other	Russulales	AF334918	6e-51	97.48
G2664	SSU	G2664__RIB_34381	Mucoromycota	Mucoromycetes	Mucorales	HM161751	9e-64	98.56
G2664	SSU	G2664__RIB_3439	Ascomycota	Eurotiomycetes	Eurotiales	JN397370	1e-127	99.6
G2664	SSU	G2664__RIB_34393	Ascomycota	Fungi other	Eurotiales	AF245255	7e-50	99.1
G2664	SSU	G2664__RIB_3441	Chytridiomycota	Chytridiomycetes	Chytridiales	FJ799984	0	97.23
G2664	SSU	G2664__RIB_34436	Ascomycota	Eurotiomycetes	Eurotiales	JX396260	1e-127	99.6
G2664	SSU	G2664__RIB_34448	Ascomycota	Eurotiomycetes	Eurotiales	JN397370	2e-70	100
G2664	SSU	G2664__RIB_34462	Basidiomycota	Agaricomycetes	Russulales	AY293156	4e-153	97.2
G2664	SSU	G2664__RIB_34496	Ascomycota	Eurotiomycetes		KC337077	1e-127	99.6
G2664	SSU	G2664__RIB_34516	Ascomycota	Eurotiomycetes	Eurotiales	JN397370	1e-127	99.6
G2664	SSU	G2664__RIB_34551	Ascomycota	Eurotiomycetes	Eurotiales	JN397370	3e-174	99.7
G2664	SSU	G2664__RIB_3456	Ascomycota	Dothideomycetes	Acrospermales	JQ345727	3e-89	96.08
G2664	SSU	G2664__RIB_34592	Basidiomycota	Agaricomycetes	Russulales	AY707093	0	97.68
G2664	SSU	G2664__RIB_34602	Ascomycota	Eurotiomycetes	Eurotiales	AOTG01000575	0	99.05
G2664	SSU	G2664__RIB_34611	Ascomycota	Dothideomycetes	Dothideales	EU167562	0	99.78
G2664	SSU	G2664__RIB_34616	Ascomycota	Fungi other		ABPE01001451	7e-75	90.7
G2664	SSU	G2664__RIB_34670	Ascomycota	Eurotiomycetes		KC337077	1e-107	100
G2664	SSU	G2664__RIB_34684	Ascomycota	Eurotiomycetes	Eurotiales	JN397370	4e-92	99.47
G2664	SSU	G2664__RIB_34690	Ascomycota	Fungi other	Saccharomycetales	KC674744	4e-58	99.21
G2664	SSU	G2664__RIB_34697	Ascomycota	Eurotiomycetes	Eurotiales	AB032070	1e-127	99.6
G2664	SSU	G2664__RIB_34699	Ascomycota	Eurotiomycetes	Eurotiales	JN397370	2e-124	99.19
G2664	SSU	G2664__RIB_34721	Ascomycota	Eurotiomycetes		KC337077	7e-135	100
G2664	SSU	G2664__RIB_34756	Ascomycota	Eurotiomycetes	Eurotiales	EU136028	1e-111	99.55
G2664	SSU	G2664__RIB_34773	Ascomycota	Eurotiomycetes	Eurotiales	KF758801	0	99.72
G2664	SSU	G2664__RIB_34782	Chytridiomycota	Chytridiomycetes	Spizellomycetales	M59759	0	98.14
G2664	SSU	G2664__RIB_34855	Basidiomycota	Agaricomycetes	Russulales	AY707093	4e-127	99.6
G2664	SSU	G2664__RIB_34902	Ascomycota	Fungi other		KC790496	7e-60	97.1
G2664	SSU	G2664__RIB_34925	Ascomycota	Sordariomycetes	Hypocreales	FJ810620	2e-129	100
G2664	SSU	G2664__RIB_34941	Basidiomycota	Agaricomycetes	Russulales	AY707093	4e-87	99.44
G2664	SSU	G2664__RIB_35000	Ascomycota	Fungi other	Chaetothyriales	AY554290	3e-59	99.21
G2664	SSU	G2664__RIB_35012	Ascomycota	Eurotiomycetes	Eurotiales	JN397370	8e-170	99.39
G2664	SSU	G2664__RIB_35027	Ascomycota	Eurotiomycetes	Eurotiales	KF152942	1e-111	99.55
G2664	SSU	G2664__RIB_35037	Basidiomycota	Agaricomycetes	Russulales	AEOJ01000011	8e-130	98.48
G2664	SSU	G2664__RIB_35054	Basidiomycota	Agaricomycetes	Russulales	U59093	1e-157	99.04
G2664	SSU	G2664__RIB_35080	Ascomycota	Eurotiomycetes	Eurotiales	AAKD03000144	7e-105	99.52
G2664	SSU	G2664__RIB_35085	Basidiomycota	Agaricomycetes	Hymenochaetales	AY771611	2e-70	99.33
G2664	SSU	G2664__RIB_35092	Ascomycota	Eurotiomycetes		KC337077	2e-135	100
G2664	SSU	G2664__RIB_35102	Basidiomycota	Agaricomycetes	Russulales	U59093	5e-126	99.2
G2664	SSU	G2664__RIB_35128	Ascomycota	Eurotiomycetes	Eurotiales	GQ458035	0	99.78
G2664	SSU	G2664__RIB_35132	Basidiomycota	Agaricomycetes	Russulales	DQ457626	1e-131	99.61
G2664	SSU	G2664__RIB_35136	Ascomycota	Eurotiomycetes	Eurotiales	KF758801	1e-127	99.6
G2664	SSU	G2664__RIB_35153	Ascomycota	Eurotiomycetes	Eurotiales	KC842215	0	99.79
G2664	SSU	G2664__RIB_35158	Basidiomycota	Agaricomycetes	Russulales	AY293156	7e-176	99.13
G2664	SSU	G2664__RIB_35165	Ascomycota	Eurotiomycetes	Eurotiales	JX396260	1e-127	99.6
G2664	SSU	G2664__RIB_35200	Ascomycota	Fungi other	Chaetothyriales	KC672693	4e-57	99.19
G2664	SSU	G2664__RIB_35229	Ascomycota	Sordariomycetes	Hypocreales	JX121089	4e-127	99.6
G2664	SSU	G2664__RIB_35266	Ascomycota	Eurotiomycetes		KC337077	9e-129	100
G2664	SSU	G2664__RIB_35270	Ascomycota	Eurotiomycetes	Eurotiales	EF211128	1e-154	99.34
G2664	SSU	G2664__RIB_35290	Ascomycota	Eurotiomycetes	Eurotiales	M83260	1e-127	99.6
G2664	SSU	G2664__RIB_35315	Ascomycota	Eurotiomycetes	Eurotiales	EU136028	5e-101	99.51
G2664	SSU	G2664__RIB_35322	Ascomycota	Eurotiomycetes	Eurotiales	KF758801	9e-180	99.71
G2664	SSU	G2664__RIB_35369	Ascomycota	Eurotiomycetes	Eurotiales	M83256	2e-124	98.8
G2664	SSU	G2664__RIB_35389	Ascomycota	Eurotiomycetes	Eurotiales	KF152942	0	99.75
G2664	SSU	G2664__RIB_35399	Ascomycota	Pezizomycetes	Pezizales	EF025014	6e-71	99.33
G2664	SSU	G2664__RIB_35430	Basidiomycota	Agaricomycetes	Agaricales	ABRE01017991	4e-74	96.47
G2664	SSU	G2664__RIB_3544	Ascomycota	Eurotiomycetes	Eurotiales	FJ947527	1e-127	99.6
G2664	SSU	G2664__RIB_35460	Ascomycota	Eurotiomycetes	Eurotiales	JN397370	2e-129	100
G2664	SSU	G2664__RIB_35487	Basidiomycota	Agaricomycetes	Russulales	AY707093	2e-124	98.8
G2664	SSU	G2664__RIB_35523	Ascomycota	Eurotiomycetes	Eurotiales	KF152942	0	99.76
G2664	SSU	G2664__RIB_35526	Ascomycota	Eurotiomycetes		KC337077	2e-129	100
G2664	SSU	G2664__RIB_35573	Ascomycota	Eurotiomycetes	Eurotiales	KF758801	0	99.79
G2664	SSU	G2664__RIB_35582	Ascomycota	Eurotiomycetes	Eurotiales	KF758801	0	99.56
G2664	SSU	G2664__RIB_35587	Ascomycota	Eurotiomycetes		KC337077	9e-79	100
G2664	SSU	G2664__RIB_35661	Basidiomycota	Agaricomycetes	Polyporales	AYOR01000592	9e-124	99.59
G2664	SSU	G2664__RIB_35714	Ascomycota	Eurotiomycetes	Eurotiales	KF758801	0	99.58
G2664	SSU	G2664__RIB_35730	Ascomycota	Eurotiomycetes		KC337077	2e-129	100
G2664	SSU	G2664__RIB_3574	Ascomycota	Eurotiomycetes	Eurotiales	JF895928	0	99.76
G2664	SSU	G2664__RIB_35777	Ascomycota	Fungi other	Eurotiales	GU573850	7e-57	99.19
G2664	SSU	G2664__RIB_35780	Basidiomycota	Agaricomycetes		EF024735	1e-122	98.41
G2664	SSU	G2664__RIB_35804	Ascomycota	Eurotiomycetes		KC337077	2e-129	100
G2664	SSU	G2664__RIB_35819	Glomeromycota	Glomeromycetes	Glomerales	L20824	1e-127	99.6
G2664	SSU	G2664__RIB_35826	Ascomycota	Eurotiomycetes	Eurotiales	M83260	1e-127	99.6
G2664	SSU	G2664__RIB_35868	Ascomycota	Eurotiomycetes	Eurotiales	JN397370	2e-129	100
G2664	SSU	G2664__RIB_35869	Ascomycota	Eurotiomycetes	Eurotiales	GQ120164	2e-119	99.58
G2664	SSU	G2664__RIB_35878	Ascomycota	Eurotiomycetes		KC337077	9e-129	100
G2664	SSU	G2664__RIB_35898	Ascomycota	Eurotiomycetes	Eurotiales	JN397370	2e-129	100
G2664	SSU	G2664__RIB_35940	Ascomycota	Eurotiomycetes	Eurotiales	AP007172	4e-82	99.41
G2664	SSU	G2664__RIB_35941	Basidiomycota	Fungi other		AAAA02041554	3e-55	99.17
G2664	SSU	G2664__RIB_35962	Ascomycota	Eurotiomycetes	Eurotiales	AOTG01000575	0	99.54
G2664	SSU	G2664__RIB_35979	Ascomycota	Eurotiomycetes	Eurotiales	AORT01023440	0	98.3
G2664	SSU	G2664__RIB_360	Basidiomycota	Agaricomycetes	Russulales	DQ457626	7e-125	99.2
G2664	SSU	G2664__RIB_36008	Ascomycota	Eurotiomycetes		KC337077	2e-129	100
G2664	SSU	G2664__RIB_36022	Ascomycota	Sordariomycetes	Hypocreales	AF218790	9e-79	99.39
G2664	SSU	G2664__RIB_36030	Ascomycota	Eurotiomycetes	Eurotiales	M83260	0	99.77
G2664	SSU	G2664__RIB_3608	Ascomycota	Leotiomycetes		JQ689428	7e-177	98.05
G2664	SSU	G2664__RIB_36094	Ascomycota	Eurotiomycetes		KC337077	2e-129	100
G2664	SSU	G2664__RIB_361	Ascomycota	Eurotiomycetes	Eurotiales	AAJN01000138	2e-104	99.52
G2664	SSU	G2664__RIB_36125	Ascomycota	Eurotiomycetes		KC337077	2e-129	100
G2664	SSU	G2664__RIB_36131	Ascomycota	Eurotiomycetes	Eurotiales	AP007172	3e-89	99.45
G2664	SSU	G2664__RIB_36133	Ascomycota	Eurotiomycetes	Eurotiales	FJ430768	0	99.57
G2664	SSU	G2664__RIB_36152	Basidiomycota	Agaricomycetes		DQ511230	1e-127	99.6
G2664	SSU	G2664__RIB_36211	Ascomycota	Eurotiomycetes	Eurotiales	EU835655	0	99.79
G2664	SSU	G2664__RIB_36233	Ascomycota	Eurotiomycetes	Eurotiales	U77377	1e-127	99.6
G2664	SSU	G2664__RIB_36289	Basidiomycota	Agaricomycetes	Russulales	AY707093	3e-159	99.36
G2664	SSU	G2664__RIB_36314	Ascomycota	Sordariomycetes	Hypocreales	ABDF02000071	2e-129	100
G2664	SSU	G2664__RIB_36341	Ascomycota	Eurotiomycetes	Eurotiales	FJ947527	1e-127	99.6
G2664	SSU	G2664__RIB_36358	Ascomycota	Eurotiomycetes	Eurotiales	GU824070	7e-75	99.36
G2664	SSU	G2664__RIB_36366	Basidiomycota	Agaricomycetes		KC673286	4e-127	99.6
G2664	SSU	G2664__RIB_36367	Ascomycota	Eurotiomycetes	Eurotiales	JN397370	1e-127	99.6
G2664	SSU	G2664__RIB_36382	Basidiomycota	Agaricomycetes	Polyporales	AF518577	3e-174	98.84
G2664	SSU	G2664__RIB_3639	Ascomycota	Eurotiomycetes	Eurotiales	EU136028	4e-128	99.6
G2664	SSU	G2664__RIB_36414	Ascomycota	Sordariomycetes	Hypocreales	EF397557	2e-143	96.76
G2664	SSU	G2664__RIB_36431	Basidiomycota	Agaricomycetes	Boletales	DQ534688	2e-95	98.98
G2664	SSU	G2664__RIB_3647	Basidiomycota	Agaricomycetes		DQ511033	1e-127	99.6
G2664	SSU	G2664__RIB_36492	Ascomycota	Fungi other	Eurotiales	GU573850	4e-69	99.32
G2664	SSU	G2664__RIB_3652	Ascomycota	Eurotiomycetes		KC337077	0	100
G2664	SSU	G2664__RIB_36527	Ascomycota	Sordariomycetes	Hypocreales	ABDF02000071	3e-174	100
G2664	SSU	G2664__RIB_36546	Basidiomycota	Fungi other		KC671457	7e-60	97.78
G2664	SSU	G2664__RIB_36555	Ascomycota	Eurotiomycetes	Eurotiales	M83260	0	99.76
G2664	SSU	G2664__RIB_36615	Ascomycota	Sordariomycetes	Xylariales	AF346563	0	99.09
G2664	SSU	G2664__RIB_36624	Ascomycota	Eurotiomycetes	Eurotiales	GU733351	1e-127	99.6
[truncated: 20,353 more rows]
